# Supplementary material for: Analysis of transcription factor- and ncRNA-mediated potential pathogenic gene modules in Alzheimer’s disease
Source: publisher site journal article supplement (doi:10.18632/aging.102169), 2019-08-16
Supplement: Supplementary file [file aging-v11i16-102169-supplementary-material-SD1.pdf]

**Supplementary Table 1. Clinical information for GSE110226.**

| Clinical information for GSE110226 |     |        |               |        |         |               |                            |
|------------------------------------|-----|--------|---------------|--------|---------|---------------|----------------------------|
| Samples                            | Age | Sex    | Apoe genotype | ba_rin | ba8s18s | disease state | Braak staging              |
| GSM2982966                         | 74  | female | E4/E4         | 4.1    | 0.648   | AD            | III-IV                     |
| GSM2982967                         | 84  | female | E3/E4         | 6.5    | 0.826   | AD            | severe V-VI                |
| GSM2982968                         | 84  | male   | E3/E4         | 6.6    | 0.814   | AD            | severe V-VI                |
| GSM2982969                         | 84  | female | E3/E4         | 6.9    | 1.007   | AD            | severe + Lewy body disease |
| GSM2982970                         | 89  | male   | E2/E3         | 6.8    | 0.947   | AD            | severe V-VI                |
| GSM2982971                         | 73  | male   | E3/E3         | 6.1    | 0.855   | AD            | severe V-VI                |
| GSM2982972                         | 70  | male   | E3/E4         | 7      | 0.953   | AD            | severe V-VI                |
| GSM2982973                         | 62  | male   | E3/E4         | 6.9    | 0.841   | Control       |                            |
| GSM2982974                         | 55  | female | E3/E3         | 7.6    | 1.197   | Control       |                            |
| GSM2982975                         | 37  | male   | E3/E3         | 6.9    | 1.036   | Control       |                            |
| GSM2982976                         | 64  | male   | E3/E3         | 7.2    | 1.12    | Control       |                            |
| GSM2982977                         | 69  | female | E3/E3         | 6.9    | 0.997   | Control       |                            |
| GSM2982978                         | 70  | male   | E3/E4         | 5.8    | 0.636   | Control       |                            |
