# Supplementary material for: Analysis of transcription factor- and ncRNA-mediated potential pathogenic gene modules in Alzheimer’s disease
Source: Aging (Albany NY). 2019 Aug 16;11(16):6109–19. doi: 10.18632/aging.102169 (PMC6738443; doi:10.18632/aging.102169)
Supplement: Supplementary Table 2 [file aging-11-102169-s002.xlsx]

## Sheet: S3_W
gene	logFC	P.Value	Dgree	W
SLC11A1	1.82671	3.21e-05	373	3061.92
SERPINE1	2.59718	2.69e-05	241	2860.59
EFCAB3	2.13187	0.000804494	388	2559.64
PIM1	0.96404	5.02e-05	567	2350.21
IL6	2.13581	0.00583859	457	2180.23
BCL6	1.18556	0.0002103	483	2105.63
RND3	1.2378	0.000691422	535	2092.8
ZBTB16	1.69497	0.000749144	387	2050.14
LRG1	1.2988	0.000840504	445	1777.5
RASL10B	1.37238	0.000832378	411	1737.09
CALB1	-1.67733	0.0033634	412	1709.14
ABL2	0.751049	2.22e-05	484	1691.55
CSF3	2.34404	0.00119494	239	1637.35
NFKB2	0.888276	0.000153534	470	1592.22
NFKB1	0.600443	0.00025721	701	1510.95
TIMP1	1.44207	0.000140019	269	1494.96
IRAK3	0.92833	0.00121179	544	1472.9
OGN	-1.09825	0.00483767	568	1444.33
MLKL	1.15911	0.00429683	521	1429.34
ZSCAN4	1.43708	0.000410745	281	1367.51
CTSG	-1.21413	1.55e-07	154	1273.35
FOSL1	1.6854	0.00011016	187	1247.43
KANK4	-1.50132	0.00544782	360	1223.52
FURIN	0.670636	0.000192664	475	1183.48
TNS1	0.715441	8.22e-05	402	1174.91
IL8	1.27419	0.00819307	438	1164.5
NPR3	-1.45872	0.0018489	286	1140.22
CCNA2	1.1793	0.00423941	404	1130.44
HIVEP1	0.778175	0.000278047	397	1098.54
CDKN3	0.801521	0.000331191	383	1068.28
CCL20	2.63685	0.00527549	170	1021.03
HMOX1	1.25051	3.74e-05	184	1018.55
SLC5A5	-1.11776	4.66e-05	210	1016.84
FGR	0.680514	0.00337921	591	993.871
RND1	1.07227	0.00876884	450	992.578
RHOBTB1	-0.655606	0.00034549	434	984.93
TLR2	0.839987	0.0145477	637	983.037
PCSK1	1.20613	0.0056009	360	977.724
AGT	1.05985	2.94e-05	199	955.891
RERGL	-0.908943	0.00268723	409	955.676
OSR1	-0.939521	0.000280503	286	954.45
JAK3	0.551006	0.000972846	572	949.294
ARL5B	0.775805	0.00133536	423	943.28
LRRC17	-0.80364	0.00193731	429	935.27
MDH1B	-0.961304	0.000684831	306	930.841
SPP1	1.44649	0.00281231	250	922.478
ASB13	0.736336	0.000978731	415	919.591
FLT4	0.515316	0.000423474	523	909.105
NFKBIA	0.683136	0.00363914	545	908.062
PDGFRL	-0.763038	0.00310507	468	895.586
ISG20	0.957795	8.07e-05	228	893.897
SOCS3	1.16558	0.000479717	231	893.644
TLR8	0.883898	0.0134991	536	885.804
BAZ1A	0.611336	0.00014094	375	882.838
PRELP	0.761968	0.0027865	446	868.266
HCK	0.647132	0.00519774	587	867.686
ISLR	-0.751705	0.0027803	451	866.501
ASB9	-0.692001	0.00101053	418	866.453
TTK	-1.53797	0.000791109	177	844.364
SERPINA3	2.08169	3.27e-05	88	821.654
RHBDF2	0.81549	0.000421909	297	817.374
HSD17B6	0.759068	0.00196323	397	815.763
ACTB	-0.562443	0.0138107	768	803.345
KLC2	0.717081	0.00160218	399	799.775
LRRC8A	0.607147	0.000933648	433	796.522
FLT1	0.564181	0.00744122	662	794.915
MAP3K11	0.600429	0.00283154	519	794.007
IGF1R	0.415836	0.000942299	624	785.143
STAT5B	0.606712	6.75e-05	305	771.766
MAPK13	0.718586	0.0070916	495	764.49
CXCL1	1.39187	0.00550103	239	751.659
ALPL	1.13748	0.00441053	279	747.539
CDK18	0.721843	0.00725908	478	738.083
SHPRH	-0.611777	0.000690321	381	736.777
TESC	0.698029	0.00138282	369	736.461
CYP2B6	-0.860455	0.000305362	243	734.992
LDHA	1.09464	0.00788001	315	725.299
ADM	1.42433	0.000489159	153	721.443
IRAK1	0.402457	0.000834622	581	719.841
SLC7A1	0.889383	0.000293399	227	713.185
HMGCLL1	-1.40435	3.68e-05	114	709.961
CDK3	0.533308	0.00203429	493	707.675
BCL3	0.694943	0.00672881	466	703.408
MTF1	0.509671	0.000161687	363	701.435
PDLIM1	0.834419	0.00143171	294	697.723
MYO1F	0.72715	0.000289885	271	697.145
CD44	0.756567	0.000960672	305	696.28
APOA1	-1.39752	0.0013652	170	680.615
RHOG	0.458893	0.000540079	449	673.254
MARK2	0.503325	0.000505739	403	668.575
CAPSL	-0.957583	0.00224166	263	667.244
ANKRD37	0.855745	0.00896826	373	653.481
PNPLA6	0.630088	0.0103309	519	649.408
TEAD4	0.765521	2.12e-05	181	647.615
OXTR	1.11322	0.000889528	189	641.892
ZNF396	-0.636519	0.000292563	284	638.806
RAD54L	0.59314	0.00182266	392	636.917
DUSP4	0.763893	0.00405413	348	635.904
STAT3	0.562732	0.00119731	386	634.656
ZSCAN22	0.668767	0.000628654	295	631.629
CCNA1	-0.832069	0.00626566	344	630.578
TDRD9	1.05212	0.000360196	172	623.143
RHOBTB2	0.445967	0.000567765	430	622.439
TUBAL3	-1.38512	0.0229736	274	621.95
TESK1	0.552974	0.00403739	467	618.198
ZNF43	-0.959882	0.00612301	291	618.158
FLRT3	-0.686636	0.00622923	407	616.369
RIPK1	0.37978	0.00114273	548	612.298
NGF	0.887255	0.00624421	312	610.264
F2	0.666279	0.0101776	452	600.013
BRSK2	0.66797	0.00106134	302	599.965
MME	-1.11535	0.0192252	312	597.194
FGFR1	0.516478	0.0110559	591	597.171
ICAM1	0.928133	0.00595889	288	594.704
GSK3A	0.4221	0.003112	562	594.702
KIT	0.605195	0.0389854	694	591.829
LIPG	1.69794	0.00117986	118	586.68
TYRO3	0.531574	0.0281248	702	578.745
SSH1	0.614149	0.000199846	254	577.068
CD40LG	0.67869	0.00645768	388	576.677
TXK	0.524433	0.0151287	603	575.608
CYP27B1	1.10856	0.000239166	143	574.066
ECM2	-0.679288	0.011194	433	573.855
TOX3	0.876883	0.000496565	198	573.654
ERN1	0.40981	0.00476376	588	559.541
HPGDS	-0.715614	0.00742683	367	559.192
TUBA3C	1.06758	0.0365481	364	558.467
HIST1H4C	-0.49181	0.00142854	399	558.301
ZBTB1	0.609758	0.00114633	311	557.657
LIF	1.12181	0.00136202	173	556.18
NOP2	0.83516	0.000419588	197	555.635
ELL	0.614962	0.000116362	229	554.037
VEGFA	0.55427	0.00319111	398	550.629
SH3GL1	0.638033	0.000561667	265	549.594
TTC32	-0.577923	0.00294775	373	545.49
RLF	0.565162	0.00052358	294	545.166
EREG	1.40585	0.0236462	238	544.125
ANKRD7	-0.528244	0.00636515	467	541.778
ITGA5	1.17744	8e-06	90	540.12
ASB14	0.498371	0.00446475	453	530.587
CCT6B	-1.26663	0.00489006	181	529.749
ZNF624	-0.80589	0.0108533	333	527.18
LUM	-0.59935	0.0336568	588	519.086
KCNU1	-1.43309	0.000284145	102	518.406
IRAK2	0.606476	0.0228883	519	516.33
CETN2	-0.624545	0.00702227	382	513.779
LOX	0.997664	0.00111749	173	509.461
THBS1	1.09556	0.00283603	182	507.907
IL1RL1	2.4838	0.000140227	53	507.237
EPHA2	0.492874	0.0150968	565	507.133
ZKSCAN3	-0.588818	0.0017559	309	501.349
MYLK4	-0.628757	0.000462458	239	501.149
MXRA5	-0.817396	0.037115	428	500.437
INSR	0.446356	0.021113	665	497.319
OMD	-0.61143	0.0321825	540	492.742
FOXO3	0.557715	0.00316449	353	492.124
ZNF646	0.655229	0.00226002	282	488.893
ZNF214	-0.592254	0.00134296	287	488.163
MMP1	1.95763	0.0230669	152	487.11
TOP2A	-0.406452	0.0137514	642	485.784
EGR4	0.822407	0.00893197	288	485.325
YWHAH	0.484587	0.00286589	391	481.782
LAT2	0.76866	0.000688137	197	478.858
MYO9B	0.529039	0.000239267	249	477.012
MAPK11	0.436526	0.00836133	524	475.258
XPO6	0.435102	0.00108942	368	474.398
MAP3K6	0.46082	0.00156649	367	474.397
MEFV	0.799307	0.000791141	191	473.536
MAP3K5	0.421994	0.00364773	459	472.225
RASD1	0.736143	0.0342377	436	470.363
CCRN4L	0.794567	0.000924928	195	470.073
ARL4A	-0.494693	0.00568632	420	466.481
AIFM3	-1.04441	0.00544338	197	465.844
SHMT2	0.583839	0.000109738	201	464.671
MAPK14	0.346584	0.0133786	714	463.64
STK11	0.439552	0.0150789	578	462.806
ARL10	0.462531	0.00277618	391	462.351
STC1	1.18078	0.000108332	98	458.845
PIM3	0.380012	0.00383878	498	457.182
SGK1	-0.573846	0.00499173	346	457.014
SERPINF2	0.7926	0.000938398	190	455.94
ZNF552	-0.668829	0.00643589	310	454.356
MAP3K1	-0.394533	0.00949124	568	453.272
SIK1	0.745038	0.0191585	352	450.456
CEBPB	0.927221	0.000596577	150	448.451
DLD	-0.547138	0.000221259	224	447.965
DNA2	1.10672	0.00277794	158	446.993
ZNF772	-0.600498	0.00214625	278	445.445
IL4R	0.84904	0.000229057	143	441.949
ZNF486	0.675857	0.00439964	276	439.589
MAP3K3	0.35636	0.00231834	466	437.549
CASP4	0.80305	0.00215026	204	436.997
TSKU	0.529586	0.013994	445	436.938
GAK	0.385789	0.00199416	413	430.232
KDR	-0.432836	0.0281711	640	429.427
ANKRA2	-0.47026	0.0047977	392	427.482
TEP1	0.448054	0.00118736	325	425.992
CTTNBP2	-0.495167	0.00510895	374	424.399
ADCY1	0.589643	0.00744162	336	421.665
SPTBN5	0.7772	0.00299778	215	421.622
CETN3	-0.488998	0.0063377	389	418.117
ZNF692	0.560033	0.00260345	287	415.398
HIC2	0.488143	0.000965358	282	415.077
EPHX2	-0.72465	0.00112321	193	412.515
BRD4	0.425552	0.00196556	358	412.331
BUB1B	-0.99104	0.00149548	147	411.587
SP6	0.69835	0.00896604	287	410.353
SPAG6	-0.602036	0.00174762	247	410.056
RASIP1	0.575893	0.00459959	304	409.191
PECR	-0.649357	0.00270575	245	408.504
TLR3	-0.39558	0.0134277	551	408.029
TLR5	0.474719	0.0231164	521	404.649
HERC2	0.471562	0.0065938	393	404.166
LRRC46	-0.511595	0.027031	502	402.73
ANKS6	0.412824	0.00261178	375	399.881
CDK1	-0.341231	0.0127027	611	395.322
EDN1	0.782033	0.0106938	256	394.569
HIVEP2	0.577489	0.0112328	349	392.912
ATP13A1	0.469064	0.000514829	254	391.78
CD80	1.03087	0.0097263	188	389.944
FGFR2	-0.382667	0.019884	596	388.059
CXCL6	1.80427	0.000688638	68	387.949
ZNF226	-0.553498	0.00461678	300	387.835
CHD7	0.392379	0.00247845	379	387.515
TYK2	0.332038	0.00988267	581	386.817
CHD1	0.486785	0.00670785	364	385.107
ARG1	1.70414	0.0344738	154	383.817
BCL2L1	0.606435	0.0096491	314	383.795
KIAA1210	-2.10245	0.00013427	47	382.614
MAPK1	0.224624	0.00659898	777	380.573
VCAM1	-0.775881	0.00918202	239	377.744
HDAC7	0.444093	0.0037195	350	377.626
BRWD3	0.517225	0.0071304	339	376.433
SHANK3	0.521614	0.0157257	400	376.27
FOSL2	0.86875	0.000962826	143	374.738
ANKDD1B	-0.619807	0.0268551	384	373.901
REM1	-0.341688	0.0223461	660	372.278
ENO4	-0.637014	0.00498325	252	369.613
DIRAS3	-0.617176	0.0365502	416	368.971
PIP5K1C	0.89204	0.000605707	127	364.535
LRIG3	-0.481876	0.0188981	438	363.782
PPARG	0.663849	0.0191746	319	363.663
SERPINA1	0.731741	0.00420907	209	363.342
MAP3K9	0.482863	0.0228002	456	361.558
ZNF473	0.507358	0.00518038	311	360.647
ANKRD30B	-0.443131	0.00581687	364	360.555
PTPRR	-1.39789	0.0348461	176	358.671
SMTNL2	-1.18856	0.0138186	162	358.048
TNFSF13B	0.613083	0.00199532	216	357.548
ZBTB40	0.39603	0.00238179	343	356.317
PCCB	-0.665081	0.00016232	140	352.857
PXN	0.334005	0.00216565	396	352.411
C14orf39	-1.76897	0.00273212	77	349.176
HIST1H4D	0.530921	0.0217933	395	348.477
WDR16	-0.552495	0.012022	328	347.944
CDC20B	-0.69571	0.0136009	267	346.698
ANKHD1-EIF4EBP3	0.34955	0.00261896	384	346.557
MARK1	-0.506479	0.0154839	377	345.629
ALDH3A1	-0.718529	0.00149699	170	345.047
LRIT3	0.895414	5.88e-05	91	344.71
ARHGAP26	0.534685	0.000688421	203	343.223
ETV6	0.467976	0.00731107	342	341.865
ANKRD27	0.365805	0.00290889	368	341.423
LARGE	0.688595	0.000341019	143	341.414
TUBB3	0.458032	0.00462244	319	341.191
SRF	0.340379	0.00180543	364	339.904
PTGS2	0.756714	0.0330218	303	339.616
ZNF737	-0.622195	0.020847	324	338.866
CD38	0.81943	0.00144413	145	337.488
ZNF282	0.444686	0.00243105	290	337.125
NACC1	0.429176	0.00187501	288	337.064
SPAG1	-0.478824	0.0138677	378	336.288
MTHFD2	0.705268	0.000827523	154	334.764
ZFP41	0.592494	0.0100671	282	333.681
HGF	0.576298	0.00210246	215	331.725
BIRC3	0.704799	0.00354588	192	331.575
LYN	0.327271	0.0335808	685	330.422
ANKRD30A	-0.663969	0.0444582	367	329.462
MCM4	-0.405203	0.00694901	376	328.797
ADA	0.492738	0.00490743	288	327.688
CDK16	0.281939	0.00693233	538	327.503
FPR1	1.29785	0.0302235	165	325.427
ZNF557	0.578867	0.0123944	294	324.508
EEF1B2	-0.714776	9.58e-06	90	322.843
LRRN4	0.402577	0.0131861	426	322.396
PKN3	0.484286	0.00648908	304	322.097
FBXO32	1.21835	0.00215269	99	321.688
LATS1	-0.547205	0.0260276	371	321.687
DUSP19	-0.462933	0.00105621	232	319.651
BAZ2A	0.363098	0.00389997	363	317.509
PLA2G6	0.312007	0.00450373	433	317
CD55	0.819258	0.00620782	175	316.427
PITPNM2	0.649068	0.00158956	174	316.082
PRKACG	0.41416	0.0279197	490	315.384
SGTB	0.477912	0.0235381	405	315.151
PRND	-1.69232	0.00026444	52	314.837
SERPINH1	1.37224	0.00658407	105	314.323
ASB5	-0.407169	0.0147337	417	311.001
RXFP1	-0.480667	0.034352	439	308.933
CD36	-0.864252	0.0171798	202	308.129
SP4	-0.543348	0.0186842	328	308.054
ZNF687	0.404807	0.00250901	292	307.388
GNA14	0.603926	0.0131799	270	306.567
AKAP13	0.414154	0.00126412	254	304.877
ZNF705A	0.601186	0.0206	299	303.09
TSPYL6	-0.740269	0.00434718	173	302.467
TGM2	0.720165	0.000596479	130	301.873
MCM7	0.3807	0.00989582	393	299.911
CIRBP	-0.622822	0.00417454	202	299.351
ZNF805	0.340733	0.00406726	367	298.955
RIPK2	0.40564	0.037744	515	297.303
BDKRB2	1.08865	0.000229443	75	297.147
PLIN1	0.908965	0.00753781	154	297.145
DUSP16	0.440698	0.00143984	237	296.801
GTF3A	0.415614	0.00689551	330	296.447
BRD2	0.392601	0.0366445	523	294.853
MFHAS1	0.405986	0.0203793	429	294.485
IGFALS	-0.389098	0.0206289	449	294.469
TG	1.11283	0.0117377	137	294.306
IL7R	0.668898	0.0122351	230	294.215
ZNF420	0.424225	0.00468084	297	293.527
NLRC4	0.782145	0.000951569	124	293.049
KIF21B	0.660869	0.0267394	281	292.084
ARL16	-0.48444	0.0330527	407	291.964
RPS6KA2	0.392542	0.00836907	358	291.926
APOBEC4	-1.55783	0.00210841	70	291.817
ZNF224	0.487081	0.0179323	343	291.763
RPS6KA6	0.436688	0.00844065	322	291.58
KIF20B	-0.578881	0.00782371	238	290.232
TSSK3	0.310057	0.0123035	488	288.994
ZNF397	0.434067	0.0280753	427	287.598
HLTF	-0.50284	0.00396901	238	287.38
IL18R1	1.42035	0.000616975	63	287.213
PNPLA7	0.353358	0.0202651	478	285.999
PTPN5	0.732481	0.0145405	212	285.326
FKBP4	0.826362	0.0133745	184	284.901
TXNDC16	-0.600139	0.0302998	310	282.518
DDX21	0.533961	0.024676	329	282.434
DDX27	0.438423	0.00186044	235	281.31
MMP3	1.26235	0.0408005	160	280.613
LRRC69	0.398836	0.0309303	466	280.573
CD1C	-1.2463	0.000153586	59	280.423
ZNF202	0.393746	0.0032069	285	279.861
ITSN2	0.43631	0.00344041	260	279.448
ZNF284	0.474233	0.00761285	278	279.29
ZNF558	0.453762	0.00682461	283	278.136
MDFIC	-0.458881	0.000454266	181	277.635
MYH3	0.564567	0.00920826	241	276.995
NDC80	-0.628486	0.0450202	327	276.745
HPR	0.865726	0.0084452	154	276.428
RBM3	-0.521257	0.00306749	211	276.416
NOTCH4	0.351826	0.016298	439	276.139
REL	0.358943	0.0239988	474	275.593
MOCS3	-0.609289	0.00507517	197	275.415
SFN	0.447707	0.0299876	403	274.799
LRRC25	1.04843	4.3e-05	60	274.707
KIF11	-0.495779	0.0148095	300	272.102
KLF10	0.458569	0.0108745	302	271.933
OLAH	1.10234	0.000305056	70	271.278
UACA	-0.367152	0.0097533	366	270.213
ALDH1A1	-0.613719	0.00884655	214	269.662
ZNF571	-0.383745	0.00527624	307	268.332
PDK4	0.788137	0.0290033	221	267.808
ZNF80	-0.612586	0.0381609	308	267.615
LRRC40	-0.409243	0.0329922	441	267.391
TNFAIP3	1.15459	0.00593481	104	267.364
HIST1H4E	0.500949	0.0452871	396	266.622
CTSO	-0.70485	5.66e-05	89	266.423
NOD2	0.79415	0.00301707	133	266.211
CYP4X1	-0.936488	0.00174275	103	266.106
ACOT8	-0.659788	0.00428592	170	265.599
NOTCH2NL	-0.670743	4.54e-05	91	265.077
ZNF341	0.45966	0.00833332	277	264.733
REXO1	0.6235	0.00150939	150	263.853
WEE2	-0.542912	0.00460822	208	263.847
RRM2	-0.655706	0.00653675	184	263.576
ZGLP1	0.608907	0.00325754	174	263.509
IRF7	1.04242	0.0109834	129	263.466
DUSP2	0.746286	0.0371252	246	262.589
SKIV2L	0.569007	0.000565149	142	262.422
GNAI1	-0.362865	0.00564997	321	261.841
FARS2	-0.58005	0.0047354	194	261.591
EFCAB6	-0.418711	0.0450771	464	261.512
PHLPP2	0.298687	0.0360347	604	260.377
ACTN1	0.453627	0.0031329	229	260.123
FPR2	1.34136	0.026673	123	259.679
ZNF436	-0.405707	0.00700475	297	259.619
COLQ	-0.604615	0.00737456	201	259.129
CDK5	-0.272369	0.0172172	538	258.492
CXorf22	-1.92095	0.000744184	43	258.401
CHAD	-0.320005	0.0146746	439	257.565
SLC14A1	0.837606	0.0195817	180	257.536
ACTR1B	0.333288	0.0287503	501	257.372
RELB	0.686069	0.00195488	138	256.47
ZNF684	-0.466205	0.0105664	277	255.187
LIAS	-0.574636	0.00914864	217	254.211
ABHD10	-0.64275	0.00057493	122	254.096
WDR88	-0.388571	0.00815342	313	254.029
WT1	0.397092	0.031471	425	253.498
ANKRD50	-0.345232	0.00989063	366	253.314
DYX1C1	-0.390866	0.0200824	381	252.744
CFB	0.800845	0.00298721	125	252.74
ANKRD29	-0.342196	0.0112592	379	252.705
IDH1	-0.46134	0.00776271	259	252.116
CYP2S1	0.93866	0.00171452	97	251.831
ALDH7A1	-0.461245	0.00904573	267	251.669
ANKRD23	0.386236	0.0198805	382	251.053
HLA-DQA2	-1.9622	0.0107976	65	250.835
KIFC3	0.475567	0.00162468	189	250.702
POLD1	0.314386	0.00915964	391	250.536
ACADSB	-0.684845	0.000514787	111	249.975
LRIG2	-0.337136	0.0315961	493	249.373
DARC	1.31558	0.0021431	71	249.297
ZNF319	0.397824	0.00579941	279	248.248
ZNF619	-0.463871	0.0175316	304	247.651
PDLIM5	-0.265731	0.011937	483	246.827
F3	-0.599933	0.00662608	188	245.735
PRMT6	-0.755637	0.00233209	123	244.651
NPY2R	-1.35727	0.000403527	53	244.158
MYL5	-0.414912	0.0217783	354	244.109
TRUB1	-0.446715	0.000393639	160	243.364
AEN	0.432067	0.00672158	259	243.117
TOX	-0.47532	0.00840094	246	242.706
PLK3	0.502852	0.0183919	278	242.593
TNFRSF1B	0.693152	0.0100446	175	242.369
DDX18	0.375306	0.00337734	261	242.088
ZNF143	0.279771	0.00731271	404	241.418
DGKA	0.45984	0.00104355	176	241.298
ZNF274	0.347683	0.00463734	297	240.986
MAPK6	-0.261271	0.0132423	489	239.941
ANKRD9	0.425421	0.0283745	364	239.569
NDUFS1	-0.608837	6.55e-05	94	239.454
C7orf61	1.17052	0.00278736	80	239.236
SIK3	0.26895	0.0101805	446	238.971
LINGO2	-0.353653	0.0257318	425	238.91
ZBTB45	0.377912	0.00560787	280	238.212
RRAS	0.325355	0.0242831	452	237.458
MYO1H	-0.841187	0.0221193	170	236.701
ZNF592	0.350251	0.00648088	307	235.308
LRRC49	-0.334892	0.0224305	424	234.171
ZNF662	-0.455155	0.0143298	279	234.136
EXTL3	0.488398	0.0020292	178	234.087
JAK1	0.203505	0.0238923	709	233.993
LRFN1	0.308586	0.0166168	426	233.922
AADACL4	1.81948	0.00211248	48	233.64
HIPK2	0.391077	0.0217783	359	233.336
DCT	-0.735738	0.00400323	132	232.848
MAPK7	0.249519	0.0149497	510	232.287
APP	-0.273319	0.00565723	378	232.189
HPCAL1	0.327757	0.00650919	323	231.472
PI4K2A	0.40702	0.00226963	215	231.379
RAB11A	-0.288263	0.0204525	474	230.814
C10orf12	0.606238	0.00320919	152	229.781
PPARA	0.504377	0.0142717	246	228.987
CASP1	0.412586	0.0188976	321	228.273
CHEK2	0.505674	0.025657	283	227.652
HNRNPA1L2	-0.521075	0.00868835	211	226.607
SIRPA	0.527205	0.00222844	162	226.5
THNSL1	-0.699033	0.00199494	120	226.492
PDE4A	0.515	0.00275849	171	225.387
MYH9	0.294867	0.0074439	357	224.03
CAMK4	0.421113	0.0160435	296	223.709
TOP2B	-0.213434	0.019453	612	223.495
CDKN2D	0.288663	0.0126071	407	223.151
KIF13B	0.447914	0.0123486	260	222.246
ZBTB9	-0.493469	0.0253295	282	222.149
PAPOLG	0.518045	0.000542939	131	221.593
RHOU	0.374256	0.0433936	434	221.319
PRSS50	0.68689	0.000646862	101	221.253
HSF2	-0.41455	0.00536317	235	221.198
PLA2G2A	1.74334	0.0287431	82	220.359
GNA12	0.391788	0.0102648	282	219.714
RBAK	0.291688	0.0066197	345	219.294
DDX56	0.499694	0.00141799	154	219.187
C1GALT1	-0.575812	0.000348357	110	219.026
PPBP	1.30438	0.0273199	107	218.219
TEAD2	0.383533	0.0118375	295	217.996
KLF6	0.443633	0.0334689	332	217.3
SPTBN4	0.451566	0.00615894	217	216.606
IFFO2	0.564512	0.00387614	159	216.459
KLC1	0.263998	0.0142212	443	216.016
ZNF138	-0.363719	0.00744661	279	215.949
LDHC	0.503705	0.0466468	322	215.908
HSD17B14	-0.680243	0.0100909	159	215.892
PAPD4	-0.397963	0.000455222	162	215.444
RAD54L2	0.329581	0.0113866	335	214.593
GLIS3	0.345695	0.00633824	282	214.277
HIVEP3	0.351798	0.00771047	288	214.077
TBC1D2	0.477526	0.0017124	162	214.006
SUCLG2	-0.51649	0.000732655	132	213.741
CSNK1D	0.379056	0.000659664	177	213.401
TNFRSF11B	1.02328	0.00991413	104	213.241
SPA17	-0.743698	0.00164806	103	213.182
LXN	0.806833	0.0294124	172	212.53
PGF	0.755719	0.00223812	106	212.291
CCL7	0.514274	0.0203842	244	212.155
SGCG	-0.948543	0.0142631	121	211.848
CAD	0.248761	0.0267494	540	211.26
ZNF653	0.399021	0.0122689	277	211.242
KLHL2	0.645552	0.000335052	94	210.863
SIK2	0.36499	0.0163882	322	209.841
ZFP62	-0.383752	0.0300187	359	209.765
COL14A1	-0.706325	0.00480364	128	209.608
ZNF852	0.388605	0.0260047	340	209.412
ATXN7	0.400003	0.000803862	169	209.211
TTC6	-0.37845	0.0321605	369	208.449
ATP1A2	-0.581868	0.0293572	233	207.74
SERPINA5	0.868651	0.0273587	152	206.358
FEM1C	0.270074	0.00838974	368	206.353
HMG20A	-0.361436	0.00121544	195	205.468
ZNF324	0.386338	0.0136478	285	205.341
CSK	0.28522	0.0481043	546	205.224
GP1BA	0.292195	0.0318104	469	205.207
ACADM	-0.454345	0.00320727	181	205.087
NRG1	-0.615054	0.00732572	156	204.864
TRAF1	0.642762	0.000996211	106	204.511
AATF	0.334702	0.00384554	253	204.505
CDH17	-0.489181	0.00178621	152	204.334
ZNF275	0.311699	0.00561405	290	203.449
CKS2	0.695293	0.00261589	113	202.893
BAX	0.410117	0.0180562	283	202.341
MARK4	0.283706	0.00758391	336	202.099
RFC4	0.405407	0.011005	254	201.664
ITLN1	-1.12447	0.00843344	86	200.565
EFCAB1	-0.346286	0.0188743	335	200.009
OPA1	-0.37069	0.00740558	253	199.803
ZNF469	0.429412	0.0222281	281	199.471
ASB8	-0.270302	0.0166655	415	199.468
SERPINE2	0.756925	0.00345578	107	199.356
SMARCA1	-0.270437	0.015688	407	198.61
ZNF787	0.377107	0.0154049	290	198.2
XPO5	0.270491	0.00428306	309	197.942
SMTN	0.482949	0.00384256	169	197.139
PPM1L	0.288246	0.0211217	408	197.019
RASL10A	0.314267	0.0299378	411	196.817
PLAUR	0.674603	0.00918123	143	196.515
TBC1D16	0.473795	0.000803455	134	196.499
PNPT1	0.402601	0.00325609	196	196.273
TLR9	0.270329	0.0476697	549	196.163
1-Mar	0.561013	0.00882157	170	195.938
PRDM5	-0.330757	0.00986799	295	195.71
PFN2	-0.523406	0.000524907	114	195.707
SULT1B1	1.44038	0.0115212	70	195.452
NFKBIE	0.288779	0.0210295	403	195.185
ADH5	-0.55704	5.43e-05	82	194.841
ELF3	0.475371	0.0125424	215	194.355
SRRM5	1.21055	0.010446	81	194.251
PF4	0.931133	0.0222223	126	193.959
CBR1	-0.538431	0.00677809	166	193.855
ZNF81	0.293845	0.015505	364	193.547
ARHGEF11	0.478938	0.00211501	151	193.432
RABGAP1L	-0.386033	0.00943978	247	193.088
DUSP9	0.369475	0.00477161	225	192.977
ZNF256	0.35736	0.0114213	278	192.958
EPHB4	0.255269	0.0304806	498	192.717
IL27RA	1.10724	4.47e-05	40	192.627
DNAL1	-0.270311	0.0221519	430	192.319
UBQLN4	0.380695	0.0117164	261	191.887
ESCO2	-0.7882	0.000993345	81	191.718
C11orf70	-0.777348	0.00169877	89	191.63
ACADVL	0.526248	0.00240755	139	191.534
IRF1	0.34429	0.0117422	288	191.395
GADD45B	0.831114	0.00807296	110	191.344
IL17RA	0.569406	0.000375784	98	191.125
PRDM4	0.343939	0.0136713	298	191.068
PRKAA2	-0.346342	0.0278247	354	190.721
CIB4	-0.285686	0.0238444	411	190.522
CBLB	0.635219	0.00457401	128	190.237
ZNF492	-0.360279	0.0132541	281	190.09
FES	0.552802	0.000585423	106	189.417
PAPSS2	0.49511	0.0497053	293	189.109
IQUB	-0.747333	0.00379958	104	188.109
CDC25B	0.413745	0.00320365	182	187.829
PI4KA	0.310817	0.020562	357	187.185
NIPBL	0.334698	0.00230481	212	187.137
ZNF845	0.344061	0.0311796	361	187.07
HSD17B8	-0.638833	0.0180966	168	187.002
CYP2D6	0.540936	0.00513822	151	186.984
MTA2	0.44241	0.003661	173	186.474
RERE	0.371826	0.00676038	231	186.388
PSKH1	0.410202	0.0124636	238	185.919
ZNF69	-0.451995	0.03567	284	185.836
ZNF566	-0.362136	0.0141691	277	185.442
ZNF345	-0.336769	0.0150221	302	185.434
SSH2	0.340336	0.046191	407	184.981
ZNF491	-0.335843	0.0104984	278	184.756
TNNC1	-0.36809	0.0463335	375	184.152
ATP5B	-0.39345	0.00592287	210	184.043
SLFNL1	0.713157	0.00126879	89	183.851
INO80	0.340946	0.00863402	261	183.65
ANKS1A	0.287176	0.0222317	386	183.238
ZNF454	0.438557	0.0314541	277	182.503
ZNF493	-0.318339	0.0426111	418	182.363
GP5	-0.224493	0.0168842	458	182.246
COMP	0.617317	0.0199313	173	181.602
HDAC4	0.29734	0.0384047	430	180.996
CD79A	0.434131	0.0317403	278	180.838
GNA15	0.350843	0.0374231	361	180.718
HORMAD2	-0.573812	0.00173243	114	180.632
IRF3	0.553643	0.0054443	144	180.501
IRF2	0.600452	0.000991721	100	180.353
ADD3	-0.538535	0.000232354	92	180.04
LDLR	0.59602	0.0272508	193	179.981
LPAR3	-0.747224	0.000681403	76	179.828
TNIP1	0.469276	0.00120496	131	179.448
GLB1L	-0.74394	0.000972032	80	179.279
ZNF621	0.296845	0.00755904	283	178.224
CCDC110	0.589282	0.000562763	93	178.093
HBB	-0.524133	0.0293956	221	177.424
FLII	0.226527	0.0232507	479	177.252
TTC16	-0.323943	0.0386124	387	177.176
ACSBG1	0.51959	0.0115811	176	177.066
SELP	0.561929	0.0123223	165	177.028
SELPLG	0.577302	0.00935889	151	176.854
UPF1	0.390964	0.00558047	200	176.194
BRPF3	0.25644	0.0125891	361	175.893
CCDC89	-0.864683	0.00526054	89	175.382
TBL1X	0.341156	0.000539688	157	175.031
PKN1	0.32761	0.024919	333	174.929
GRHL3	0.803221	0.00357272	89	174.928
FOXO4	0.353098	0.0112322	254	174.848
CAPS2	-0.487012	0.0420196	260	174.303
ITGAX	0.657271	0.0491613	202	173.712
EXOSC6	-0.512153	0.000952807	112	173.288
PDHA1	-0.40463	0.00660999	196	172.874
SLA	0.66894	0.01446	140	172.303
ZNF562	0.306894	0.0130646	298	172.291
HERC4	0.244085	0.042328	513	171.968
ISM1	0.83326	0.00643182	94	171.665
ZNF664	-0.279473	0.00700923	285	171.592
FAM20C	0.651114	0.0066438	121	171.561
INTU	-0.53565	0.00481085	138	171.329
ZNF287	-0.357654	0.0222504	289	170.822
ILKAP	0.217321	0.0103149	395	170.528
PLK1	0.286226	0.0320823	398	170.163
PAG1	0.480324	0.00405111	148	170.073
NNT	-0.364148	0.00330875	188	169.803
CRISP2	-1.14628	0.0323881	99	169.044
ANGPT1	-0.660755	0.0096995	127	168.944
MITF	-0.396643	0.0187829	246	168.436
ZNF524	0.32769	0.0144411	279	168.26
ANKRD60	0.290962	0.0378155	406	168.021
PRKCH	0.288795	0.0489458	442	167.255
PTPRN2	-0.382407	0.0126285	230	166.993
PDE10A	0.672507	0.0150082	136	166.795
PIH1D2	-0.605206	0.00389711	114	166.223
ZBTB7B	0.256152	0.00589209	291	166.205
ZNF213	0.326624	0.0163976	284	165.599
IKBKB	0.325217	0.0134419	272	165.554
RORA	0.470044	0.00119688	120	164.814
KLF16	0.285862	0.0106523	292	164.653
PPM1B	-0.233549	0.0345547	481	164.18
CTSB	0.398913	0.00843416	198	163.811
ANKRD46	-0.305215	0.0348503	368	163.738
DUSP6	0.448517	0.0406945	262	163.395
ZNF25	-0.342329	0.0229662	291	163.265
SULT2A1	-1.03616	0.0295321	103	163.257
VPS4B	-0.516674	0.00839763	152	163.025
PTPN7	0.587438	0.0199554	163	162.773
PUS7	0.441771	0.000763578	118	162.494
NPR2	-0.307721	0.0142387	284	161.374
ZNF614	0.333487	0.0204943	286	161.032
SNCAIP	-0.321668	0.0481942	380	160.983
IL1R1	0.616402	0.0244611	162	160.922
ADRA2B	1.38811	0.0053634	51	160.741
COPZ2	-0.779457	0.000417162	61	160.694
FOXA1	-0.414831	0.0252356	242	160.42
ECE1	0.3404	0.0106568	238	159.792
ZNF709	-0.308298	0.0145269	282	159.78
KLHDC9	-0.49759	0.00531143	141	159.6
KIF9	-0.488299	0.00965898	162	159.401
NEK7	-0.322971	0.00599404	222	159.337
ZNF419	0.3729	0.0309891	283	159.224
C9orf114	0.675269	0.000593597	73	159.05
C4orf22	-0.961743	0.0134065	88	158.492
ZNF33B	-0.335649	0.0324103	317	158.464
HDAC10	0.308736	0.0270095	327	158.349
ZNF512	-0.277861	0.0200236	335	158.098
ZNF101	0.30615	0.0328567	348	158.039
ASB6	0.258485	0.0322993	409	157.608
LCP1	0.501652	0.0384689	222	157.572
KLRB1	-0.880071	0.00923959	88	157.553
IMPACT	-0.468186	0.00126317	116	157.418
ATP5G3	-0.505278	0.000574782	96	157.186
WAS	0.366098	0.019618	251	156.889
ALDH3A2	-0.294289	0.00723424	249	156.859
BUB1	-0.276662	0.0150424	311	156.827
BOP1	0.424011	0.00610595	167	156.79
HLA-DRB5	1.59644	0.036599	68	155.947
EIF4G1	0.412024	0.00235307	144	155.945
IKBKG	0.321519	0.00297949	192	155.925
C1orf162	1.1157	0.000167575	37	155.868
KLHL13	-0.549429	0.000651769	89	155.788
TTC37	-0.348587	0.00764245	211	155.692
ZNF681	-0.422093	0.0494244	282	155.46
ACAT1	-0.46289	0.013323	179	155.391
MDM4	-0.300919	0.00312944	206	155.254
MXD1	1.06148	0.00486055	63	154.698
PFKFB4	0.595552	0.000468153	78	154.671
CHD8	0.248667	0.0140679	334	153.798
LCP2	0.507702	0.0174654	172	153.501
NHS	-0.447195	0.00552666	152	153.453
CDKN1A	0.345048	0.023186	272	153.428
MCM9	-0.385751	0.0464406	298	153.245
ANPEP	0.467681	0.0192934	191	153.159
ACSL4	0.459352	0.0464223	250	153.111
ZNF546	-0.331736	0.0317536	308	153.079
PRKAR1A	-0.277353	0.0476108	417	152.932
RALGAPA2	0.480121	0.00312075	127	152.788
FAM81B	-0.645969	0.00154655	84	152.509
KDM5A	0.273153	0.00602001	250	151.627
ASAP1	0.326539	0.00687884	214	151.113
DRAM1	0.891175	0.000408412	50	151.005
CXCL12	-0.417444	0.0325488	243	150.887
PFKP	0.461907	0.00368363	134	150.637
BDKRB1	0.893186	0.00305571	67	150.5
PAN2	0.445857	0.0265316	213	149.691
UBR4	0.65026	0.00112759	78	149.516
SUCLG1	-0.362202	0.00398925	172	149.462
PCNT	0.356157	0.0145821	228	149.105
TUBD1	0.306388	0.0175667	277	148.972
AOC2	0.602026	0.0102654	124	148.453
CRP	0.380994	0.0245853	242	148.381
RRAS2	-0.215902	0.0244601	425	147.872
ZBTB5	0.288596	0.0155105	283	147.777
CRTC3	0.697443	0.00558542	94	147.702
ZXDC	0.262821	0.0118291	291	147.382
NUDT10	-0.538167	5.39e-05	64	147.028
DHDH	0.608231	0.000666724	76	146.815
ZNF205	0.3344	0.0284874	284	146.761
MAP3K2	0.206865	0.0469675	534	146.721
STK40	0.199582	0.036514	511	146.609
AKR7A3	-1.2209	0.00214829	45	146.576
MRPL16	-0.374033	0.00132384	136	146.408
FHDC1	0.785805	0.00469877	80	146.349
ELN	-0.359815	0.0225709	247	146.327
TNNT1	0.366194	0.0303018	263	146.248
MAEL	-0.658138	0.00751779	104	145.374
NET1	-0.643441	0.00220724	85	145.272
LDHB	-0.339186	0.0222584	259	145.171
DHX34	0.419524	0.0100089	173	145.127
TNFSF14	0.588455	0.00482154	106	144.514
SLPI	1.22874	0.0259193	74	144.244
PLXNA2	0.625768	0.00156656	82	143.936
FCN3	1.72671	0.00204886	31	143.909
GNAZ	0.321131	0.0241628	277	143.824
ALKBH8	-0.352438	0.00417941	171	143.368
MYL3	-0.312881	0.0488436	349	143.176
STK33	-0.364531	0.0227362	239	143.168
SLC6A1	-0.892679	0.0222619	97	143.084
PDK1	0.503708	0.0291813	185	143.031
YY1	0.215512	0.0199239	390	142.937
SGSM3	0.452769	0.0266537	200	142.554
ALDH1A3	-0.444857	0.0158491	178	142.532
FOXL1	0.508755	0.029594	183	142.334
CYP51A1	-0.482976	0.00842846	142	142.258
PDCD11	0.303479	0.0031299	187	142.13
CYP4Z1	-0.766629	0.0178922	106	141.993
TARBP1	-0.594345	0.00239978	91	141.694
ZNF358	0.313004	0.0240003	279	141.452
C3AR1	0.793371	0.0133037	95	141.397
CCNF	0.269846	0.0350652	360	141.358
CCIN	0.417048	0.000950151	112	141.165
RPTOR	0.357658	0.0069849	183	141.103
ZNF577	0.280767	0.0185289	290	141.036
FMO1	-1.24805	0.000886993	37	140.939
PARP1	-0.249293	0.00911081	277	140.901
HMGB1	-0.253029	0.0196542	325	140.336
SDHD	-0.493352	0.00650214	130	140.261
HIST1H4H	0.260236	0.0450348	400	140.158
PITPNC1	0.399756	0.00824151	168	139.959
ZNF530	-0.369439	0.0458023	282	139.511
SERPIND1	0.807593	0.00498991	75	139.425
ARG2	0.805417	0.00530209	76	139.29
CYP21A2	0.555052	0.0105393	126	138.278
PEA15	0.480443	0.0015479	102	137.717
IDH2	-0.40561	0.023374	208	137.625
BBS10	-0.300162	0.0121367	239	137.444
CYP2C8	-0.62205	0.0200451	130	137.311
SNRPA	0.296245	0.019204	270	137.305
SLC38A4	-1.22079	0.0013085	39	137.273
PWP1	-0.460848	0.00559815	132	136.991
TAS2R3	0.599583	0.00164081	82	136.924
RGN	-0.431007	0.0019712	117	136.421
ATP5C1	-0.478167	0.0114832	147	136.359
AGBL2	-0.674724	0.00258934	78	136.14
KDM2A	0.262978	0.0352109	356	136.06
HFM1	-0.419194	0.0130136	172	135.955
FBXL5	-0.472598	0.00257317	111	135.843
ACSL1	0.376915	0.0253188	225	135.398
DUSP23	0.354162	0.0226102	232	135.219
MNS1	-0.55151	0.00233624	93	134.97
PPM1G	0.25299	0.0424894	388	134.648
COX5A	-0.336113	0.0120644	208	134.125
MCCC2	-0.49181	0.0079929	130	134.091
BTG4	-0.794226	0.0223963	102	133.654
ZIC5	-0.335931	0.037537	279	133.608
STAT6	0.367922	0.0221784	219	133.277
ZNF292	0.229187	0.0425857	424	133.202
7-Mar	-0.319937	0.00358962	170	132.979
NOLC1	0.512967	0.00378741	107	132.919
DAND5	-0.434612	0.0156032	169	132.707
MRPS5	0.376655	0.00258332	136	132.561
CA2	-0.381015	0.049665	266	132.155
MRAP	0.769774	0.0466865	129	132.15
CABYR	0.515437	0.00345904	104	131.925
NPM1	-0.276188	0.0236701	293	131.565
UBE2T	0.3994	0.0171186	186	131.233
DENND3	0.540239	0.000597955	75	130.603
PHLDA2	0.663663	0.00372959	81	130.54
CSNK1E	0.324381	0.00454028	171	129.96
SPAG8	-0.803182	0.00327287	65	129.738
UBXN2B	0.550902	0.000963416	78	129.607
ACE	-0.281716	0.0197942	270	129.571
CCNG1	-0.273007	0.0440266	348	128.856
IL1R2	1.40701	0.0492553	70	128.782
PDE4B	0.441801	0.0154813	161	128.759
DCAF4L1	0.915804	0.0118792	73	128.708
PTPN9	0.374546	0.00261856	133	128.618
DUS4L	-0.641581	0.000670916	63	128.265
MRPS10	-0.39885	0.00209629	119	127.132
ZNF48	0.304204	0.0306103	276	127.127
ZNF528	-0.279196	0.0287683	295	126.928
IL18RAP	1.1049	0.0337231	78	126.867
RBM34	0.249143	0.00693663	235	126.398
FOXK2	0.312036	0.012561	213	126.346
TAB3	-0.560304	0.00585471	101	126.338
ALDH9A1	-0.330002	0.00779523	181	125.922
DLAT	-0.370872	0.0126916	179	125.9
AK1	-0.484173	0.0220698	157	125.896
CX3CR1	-0.775612	0.033468	110	125.875
ITGA2B	0.46316	0.0181786	156	125.752
RHBDL3	0.41401	0.0392772	216	125.72
CD3G	-0.724181	0.0256064	109	125.638
TNFRSF9	0.620243	0.0377385	142	125.349
TEAD3	0.391248	0.0145078	174	125.153
EFTUD1	0.291331	0.0171333	243	125.032
KIF12	-0.537714	0.0352276	160	125.018
ZWILCH	-0.746186	0.00509191	73	124.91
ZNF516	0.305692	0.0377023	287	124.9
MUC1	0.431214	0.0103818	146	124.89
ZCCHC6	0.325157	0.00698745	178	124.766
NDUFB5	-0.670371	0.0020154	69	124.688
CHD3	0.293289	0.0194294	247	123.988
DYNC1H1	0.330198	0.000618253	117	123.967
STAT5A	0.266224	0.0137454	250	123.917
SPATS1	-0.739145	0.0121529	87	123.166
PRKCD	0.258131	0.0417361	345	122.851
TCP10L	0.590138	0.00356158	85	122.814
CD40	0.285757	0.0219951	259	122.686
CHODL	-1.33865	0.0173703	52	122.527
TTBK1	0.498338	0.0100579	123	122.437
IFIT5	0.237907	0.0434897	377	122.124
EP400	0.252106	0.0237527	298	122.029
PTPN23	0.267699	0.0284921	294	121.619
PDE5A	-0.372545	0.00588967	146	121.288
MICAL2	0.316402	0.0117588	198	120.887
BMS1	0.433031	0.00827216	134	120.833
PTTG1	0.487317	0.00372169	102	120.75
ATP2C1	-0.25597	0.00946712	233	120.701
DCTN1	0.490305	0.00211807	92	120.622
DMRT1	-0.757336	0.013062	84	119.852
CPSF4	0.317374	0.0197663	221	119.523
PLCL2	0.418229	0.0381858	201	119.211
ZNF628	0.310017	0.0463259	286	118.294
CALCR	-0.499054	0.00503574	103	118.12
TAOK3	0.409671	0.00892255	140	117.548
PAK7	-0.406887	0.0393066	205	117.238
ZNF649	-0.271376	0.0292651	280	116.535
ELK4	0.42352	0.00342733	111	115.884
IL2RG	0.488979	0.00218629	89	115.773
CD276	0.38179	0.00865889	147	115.756
ZNF536	-0.29726	0.0417408	282	115.634
ZNF578	-0.237884	0.0184905	280	115.434
PIK3R3	0.551702	0.0233434	128	115.237
FGL2	-0.691614	0.0192055	97	115.159
CD1D	0.693104	0.0302593	109	114.769
GNL2	0.356902	0.00432734	136	114.735
C12orf56	-0.742167	0.000368776	45	114.662
SPIN1	-0.316007	0.00187164	133	114.646
CCDC67	-0.70027	0.0240836	101	114.457
ZNF280D	-0.228887	0.0244278	310	114.387
REPIN1	0.296073	0.045116	287	114.345
CASP10	0.326855	0.0272257	223	114.072
TAZ	0.344027	0.0125147	174	113.89
SP110	0.498919	0.0215734	137	113.88
SF3B3	0.329013	0.0039487	144	113.875
BANP	0.390101	0.000955919	96	113.082
ODF3L1	-0.663476	0.00146801	60	112.788
ZNF263	0.264738	0.0316537	284	112.747
MYO7A	0.41446	0.0431844	199	112.555
KIF1C	0.362565	0.0128163	164	112.514
SETD8	0.245037	0.0468526	345	112.373
LILRB2	0.830579	0.009956	67	111.404
GPR65	0.59324	0.0218881	113	111.266
ZNF534	-0.277812	0.0394748	285	111.138
DYNLRB2	-0.577207	0.0244005	119	110.766
HSF1	0.26025	0.0212302	254	110.594
MIB1	-0.185293	0.043965	439	110.375
SPAG5	0.713971	0.00355583	63	110.159
ZFYVE16	-0.364484	0.000968525	100	109.851
SCAND3	-0.659757	0.00882477	81	109.782
C4B	0.844817	0.0205696	77	109.726
IGF2R	0.296265	0.00816026	177	109.508
FTSJ3	0.469688	0.0222233	141	109.484
KIF5B	0.224646	0.0229506	297	109.368
PLAC8L1	0.575819	0.000981505	63	109.124
ACCS	-0.472329	0.00393921	96	109.033
GABPB2	-0.184109	0.0444664	438	109.022
MDH1	-0.265679	0.0290922	267	108.974
FBXL6	0.514407	0.00163702	76	108.916
TDRD6	0.635643	0.00642565	78	108.684
ZNF606	-0.278706	0.0420844	281	107.754
ZNF410	0.274842	0.0436974	288	107.614
LMNB2	0.344561	0.000561418	96	107.527
PIP4K2A	0.338337	0.012874	168	107.445
MARS	0.342725	0.010676	159	107.439
FAM13B	-0.292452	0.00841872	177	107.397
HDAC5	0.214983	0.0449315	370	107.181
CAMKV	0.260788	0.0207582	244	107.081
PPP3CB	-0.180404	0.0410714	427	106.802
MPST	0.617481	0.000923958	57	106.798
PLEC	0.295467	0.0491332	276	106.717
ZNF581	0.268017	0.0374834	279	106.644
CPT1A	0.633018	0.00834271	81	106.584
WDR5	0.190717	0.0307669	367	105.824
EPOR	0.350986	0.0483086	229	105.772
CBR4	-0.266701	0.0064418	181	105.766
ZNF506	-0.205976	0.0492091	392	105.607
TRIO	0.338779	0.00579243	139	105.347
TMEM154	0.770412	0.00263405	53	105.321
ZBTB44	0.214293	0.0426863	358	105.08
ARHGAP28	-0.650568	0.00147483	57	104.99
DMGDH	-0.471056	0.0312814	148	104.903
RBM8A	-0.347982	0.042727	220	104.828
NXF1	0.4161	0.00443138	107	104.782
ZNF19	-0.27254	0.042639	280	104.561
KIF26A	0.40156	0.0315164	173	104.306
CIC	0.485921	0.00242984	82	104.173
HP1BP3	0.448796	0.0108007	118	104.144
IL3RA	0.462904	0.00227883	85	103.966
NR3C2	-0.282974	0.0116122	189	103.492
ECHDC1	-0.361583	0.00368276	117	102.964
TUBGCP6	0.534	0.00575916	86	102.853
MBTD1	-0.331565	0.0139749	167	102.695
FBXL13	-0.695793	0.00185549	54	102.632
HERC3	-0.167477	0.0419999	445	102.606
SDHB	-0.361676	0.0371016	198	102.448
GBP2	0.531069	0.00610196	87	102.318
USP3	0.303283	0.0235367	207	102.221
RPL27A	0.40196	0.0115549	131	102.009
CWC22	0.279491	0.0120423	190	101.921
KIF14	0.279188	0.0150586	199	101.239
CLTC	-0.250862	0.0187451	233	100.951
ERC1	0.384648	0.0275455	168	100.805
PDE2A	0.595469	0.0349314	116	100.627
SIN3B	0.228911	0.0316955	292	100.196
RPL10A	-0.36441	0.00986222	137	100.149
KDM4D	-0.481976	0.0217858	125	100.12
MYO5B	0.239326	0.0282284	269	99.7428
XPOT	-0.41965	0.000918328	78	99.4093
P2RY12	-0.770631	0.0129294	68	98.9588
ACSS1	0.387462	0.0159791	142	98.8399
QTRTD1	-0.403318	0.00775909	116	98.7249
SIAH2	0.542545	0.013393	97	98.5765
SNRPF	-0.351295	0.0177023	160	98.4734
PTPRH	0.426386	0.0163014	129	98.3344
EMILIN1	0.428462	0.0182892	132	98.285
UBE2O	0.516171	0.00268993	74	98.1753
RBM19	0.342861	0.00148119	101	97.9789
CRYBA1	0.569883	0.00713098	80	97.8763
DDX60	-0.443181	0.0377302	155	97.7715
BATF	0.463131	0.0127341	111	97.4189
POLR2H	0.363219	0.00238425	102	97.1648
C15orf48	1.38641	0.002557	27	97.0368
AEBP2	-0.214944	0.0365327	314	97.0079
SNRPD3	-0.364588	0.0152336	146	96.7292
ANGEL2	-0.289379	0.00929403	164	96.4251
SPINK1	0.352813	0.0377393	192	96.4081
AACS	0.339176	0.0109633	145	96.3967
S1PR3	0.761674	0.0165829	71	96.2788
ZNF668	0.221135	0.0286032	281	95.9165
WDR59	0.28324	0.0241309	209	95.7472
BACE2	0.333981	0.0241244	177	95.6205
SENP7	-0.334323	0.00359604	117	95.6057
CCBL2	-0.506552	0.0142232	102	95.4314
LARP1B	0.375506	0.00264289	98	94.8663
NMS	0.490638	0.00336135	78	94.6597
SLC22A12	-0.252293	0.0284087	241	94.0341
ATP9B	-0.296964	0.0138267	170	93.8638
C14orf166B	0.55864	0.0129947	89	93.7816
PTPDC1	0.293317	0.0423689	232	93.4287
SKIV2L2	0.240755	0.0145586	211	93.3121
INF2	0.442086	0.00386221	87	92.8139
MNT	0.395333	0.0183163	135	92.7123
PLXNA3	0.418579	0.0144364	120	92.4493
GLIPR1L2	-0.598107	0.034274	105	92.006
VRK1	-0.341015	0.039751	192	91.7077
GNL3	0.319771	0.0212304	171	91.4834
TRAF3	0.352183	0.00488044	112	91.1776
KPNA5	-0.250203	0.0332341	246	90.9965
KDM3A	0.37416	0.00203773	90	90.6128
CDYL	0.281249	0.0137601	173	90.5675
PPME1	0.32799	0.00816942	132	90.3912
MTR	-0.264652	0.0260275	215	90.1623
KLF13	0.20335	0.0292397	289	90.1522
SOHLH2	-1.52167	0.00528983	26	90.0685
ARFGAP1	0.388055	0.0131593	123	89.7705
PYGL	0.545221	0.0192771	96	89.7631
TSPYL2	0.54176	0.0205697	98	89.5548
ARAP1	0.377733	0.0310872	157	89.3962
C10orf82	-0.4806	0.00103769	62	88.9128
CASC1	-0.464536	0.0112459	98	88.7275
AIFM1	-0.295219	0.0194387	175	88.4131
ATP1A1	0.261195	0.0443919	250	88.3295
FOXJ3	0.238764	0.0279942	238	88.2468
FBXO42	0.356255	0.00298673	98	88.1485
ZNF142	0.218033	0.0360158	280	88.1251
RBMX	-0.368141	0.00134661	83	87.7181
CAMP	-0.786776	0.0389463	79	87.61
CCL27	0.441788	0.0239707	122	87.3322
RPUSD1	0.304931	0.0455904	213	87.1066
RHPN1	0.347463	0.048537	190	86.7427
RAD51AP1	-0.654093	0.00851816	64	86.6397
ROPN1L	-0.437679	0.0112424	101	86.1629
MDN1	0.447637	0.000889802	63	86.0334
FUS	-0.264314	0.0374731	228	85.9528
OXCT1	-0.499991	0.0107162	87	85.6918
ACSS2	0.32359	0.0183202	152	85.4391
TP53I3	-0.41473	0.00484974	89	85.4223
EIF3B	0.295444	0.0120289	150	85.0779
RACGAP1	0.398108	0.0394315	152	84.969
TEKT3	-0.575331	0.0345534	101	84.926
NINL	0.429474	0.0044634	84	84.7902
PCDH20	0.663371	0.0132759	68	84.6672
PEX11B	-0.509776	0.00216855	62	84.1934
SLC12A6	0.341919	0.0486156	187	83.9661
DUS1L	0.421848	0.0018771	73	83.9626
CLU	-0.202339	0.0277705	266	83.7695
C1orf63	-0.786438	0.0181677	61	83.5061
WDR93	-0.506657	0.012212	86	83.3635
GPR4	1.02515	0.0029119	32	83.1874
NACC2	0.206748	0.0457732	300	83.0749
FKBP11	0.279585	0.0125011	156	83.002
ALOX5	0.501172	0.018203	95	82.8369
ELAC1	-0.501505	0.0037802	68	82.6124
KLHL25	0.63244	0.00356366	53	82.0588
PA2G4	0.240749	0.0297422	223	81.96
ICOSLG	0.389213	0.00271672	82	81.8938
PDE7A	0.263519	0.0160126	173	81.8564
GZMA	-0.36769	0.0256696	139	81.293
NHP2L1	-0.371596	0.0464843	164	81.2167
FICD	0.435287	0.00573694	83	80.9762
DENND4A	0.366171	0.00308139	88	80.9203
GFOD1	0.564583	0.00311147	57	80.6795
FOXJ2	0.300036	0.0321932	180	80.5903
PIP4K2B	0.352828	0.0125367	120	80.5218
CREB5	0.394033	0.0363931	142	80.5149
C2CD3	0.326558	0.0428032	180	80.4425
CENPH	-0.626717	0.0156654	71	80.3194
PDXP	0.227545	0.0341427	239	79.7641
SART1	0.420428	0.00553594	84	79.7013
UGGT1	0.249422	0.00902435	155	79.0444
NUP50	0.245967	0.00727601	150	78.8855
OLA1	-0.391556	0.00885312	98	78.775
GNAL	0.69217	0.00782042	54	78.7451
XAB2	0.32884	0.0102331	120	78.5269
ZNFX1	0.373867	0.0389758	149	78.5014
OAT	-0.247715	0.0219418	191	78.4804
F12	0.326943	0.0129358	127	78.4016
MIOS	0.850326	0.00086073	30	78.1909
HNRNPAB	0.221686	0.0379889	248	78.0877
CD22	0.75311	0.038208	73	77.9489
SPATA22	0.512848	0.0243198	94	77.8091
KALRN	0.283111	0.0249394	171	77.61
OPRM1	0.244145	0.0135401	170	77.5462
ZNF529	-0.21317	0.0491482	278	77.5429
METTL1	0.41317	0.0427623	136	76.9222
IL33	-0.606669	0.0263683	80	76.6305
SHC2	0.369886	0.0106643	105	76.5911
HEATR1	0.328524	0.00594033	104	76.061
RNF216	0.287402	0.00653657	121	75.9725
SRRM3	0.724807	0.0179084	60	75.9718
WDR74	0.336414	0.00297333	89	75.6533
ATP5G1	-0.446571	0.0203336	100	75.5503
LTV1	0.461077	0.0411072	118	75.4128
RASGRP2	0.313618	0.0453607	179	75.4107
DYNC2LI1	-0.599884	0.00383489	52	75.3724
KIFC2	0.285543	0.0486951	201	75.3306
BCKDHB	-0.373021	0.0334334	136	74.8697
GRK4	0.513113	0.0304684	96	74.6838
SERPINB6	0.253081	0.0292103	192	74.562
CYP27C1	-0.441093	0.0199417	99	74.2463
MMP14	-0.333567	0.0125314	117	74.2302
TBX3	0.486207	0.0446073	112	73.5469
KCNE1	-0.448629	0.0441874	121	73.5387
COQ3	-0.427879	0.000863464	56	73.4113
DIAPH1	0.252556	0.0270377	185	73.2629
NSUN6	0.23339	0.0246951	195	73.1539
KIAA0513	0.67099	0.00162954	39	72.9564
CCBL1	0.382167	0.0125392	100	72.6778
IL21R	0.680068	0.0240501	66	72.6628
ATP5O	-0.367426	0.0335951	134	72.559
MAPK10	-0.270432	0.0163388	150	72.4803
CTPS2	-0.259456	0.0304619	184	72.3853
UBN1	0.468338	0.00246703	59	72.0593
GCN1L1	0.389114	0.0112696	95	72.0129
PDHB	-0.289586	0.0255394	156	71.9549
TSR2	-0.401267	0.0204671	106	71.8379
HAUS8	0.6602	0.00136968	38	71.8353
MRPL15	-0.312645	0.0329346	155	71.8346
VIT	-0.627411	0.0449941	85	71.8271
CROT	-0.462156	0.000249884	43	71.5867
COQ6	-0.338093	0.003986	88	71.3892
TCEA1	-0.215769	0.0442095	244	71.3104
GRK5	0.499908	0.00743597	67	71.2971
EML4	-0.235076	0.0389698	215	71.2265
P2RY14	1.02081	0.0328628	47	71.1655
B3GALNT1	-0.520868	0.00447812	58	70.9613
ASPRV1	0.391431	0.0267915	115	70.763
PGAM1	0.39855	0.0244285	110	70.6754
GBF1	0.330055	0.013552	114	70.2857
DUSP3	0.199531	0.0356116	243	70.2276
SGSM2	0.331714	0.0313901	140	69.809
PTGFR	-0.817807	0.0115743	44	69.6823
NOP10	0.316552	0.00512557	96	69.5987
MYO10	0.266871	0.0435296	191	69.3844
FDXR	-0.513302	0.0167978	76	69.2347
CSF1	0.226053	0.0341594	208	68.9529
PELI2	0.40304	0.00214522	64	68.8336
UBE2H	0.316622	0.00641228	99	68.7404
SENP6	-0.227274	0.0174528	172	68.7276
FBXO15	-0.550231	0.0287516	81	68.6954
DNAH12	-0.461775	0.0133867	79	68.3394
DNTTIP2	0.503288	0.0064574	62	68.3347
CAPN7	-0.229776	0.0209468	177	68.2808
CYP4A11	-0.335176	0.0264342	129	68.222
IL12A	-0.557271	0.0441683	90	67.9537
UNG	-0.166821	0.0267527	259	67.9484
CFL2	-0.290904	0.0172824	132	67.6747
COASY	0.326602	0.017715	118	67.5073
ZNF645	0.323805	0.0376113	146	67.3526
GRM8	-0.58325	0.0178778	66	67.2763
ME2	-0.461084	0.0371244	102	67.2698
TNFRSF10B	0.285621	0.0170241	133	67.1975
TSGA10	0.467754	0.00369506	59	67.1275
HSF2BP	0.434443	0.0160056	86	67.0921
SDS	0.325848	0.00354015	84	67.0862
PMPCB	-0.252329	0.0135284	142	66.9587
C5	-0.355002	0.00685756	87	66.8303
RAB1A	-0.264114	0.0205793	150	66.817
SLC25A3	-0.315114	0.00788174	100	66.2804
PRR16	0.649645	0.0496997	78	66.0588
BDH2	-0.303033	0.0437561	160	65.8897
UTP15	-0.235883	0.0142396	151	65.7694
HARS	0.225893	0.0316244	194	65.7339
HTR2C	-0.548786	0.0050091	52	65.6416
PSIP1	-0.315626	0.000457753	62	65.3474
MUT	-0.262337	0.0148619	136	65.2164
WDR6	0.495883	0.00331608	53	65.1625
UPF2	0.344958	0.0317456	126	65.1239
RBM10	0.46395	0.00141996	49	64.7389
ANKRD11	0.389871	0.00123562	57	64.626
TBC1D9B	0.244062	0.025619	166	64.4759
NCOA6	0.308826	0.0207191	124	64.4736
MDM1	-0.447378	0.0066477	66	64.2898
RRBP1	0.258707	0.0431723	182	64.2609
PTPRB	-0.33948	0.040617	136	64.2349
LMBRD1	-0.425406	0.01042	76	64.0841
TCF3	0.251582	0.0180336	146	64.0557
HOOK3	0.311308	0.00613462	93	64.0472
DHX16	0.257517	0.0483739	189	64.0208
TEX14	0.376654	0.010574	86	63.9992
FAM71C	0.496469	0.0272021	82	63.728
RANBP6	-0.400138	0.0274532	102	63.7274
HSDL2	-0.291513	0.0497675	167	63.4362
GPR3	0.99899	0.00132055	22	63.2795
GFOD2	0.465607	0.00339549	55	63.2296
NDUFA5	-0.404115	0.00942179	77	63.0386
FCF1	-0.329407	0.00748691	90	63.0198
SPATA4	-0.459498	0.0469031	103	62.8897
VPS13D	0.237719	0.0184549	152	62.6511
COL18A1	0.360392	0.0143288	94	62.4618
SPSB1	0.452856	0.00423061	58	62.344
HSPBAP1	0.285938	0.0182352	125	62.159
APH1B	-0.362813	0.0171645	97	62.1284
RASA3	0.395755	0.0262807	99	61.9182
DHX57	-0.238971	0.0338991	176	61.8186
MFN1	-0.246087	0.0200761	148	61.8178
DYNC1I1	0.551188	0.0108357	57	61.7403
PHF21A	0.245136	0.0107921	128	61.7161
C9orf153	0.876138	0.0158125	39	61.539
SKA2	-0.40941	0.000386915	44	61.4709
NFYA	0.219182	0.0282526	181	61.4494
IL1RAP	0.517762	0.0304527	78	61.2394
CYC1	-0.256381	0.0161178	133	61.1285
SLC22A1	0.500305	0.0443928	90	60.908
SEPT11	-0.34573	0.00895652	86	60.8887
CYP4F2	0.311274	0.0179518	112	60.8664
KIAA0430	0.265533	0.012584	120	60.5474
ADAM17	0.226887	0.0176213	152	60.4886
ARTN	0.353849	0.000890365	56	60.4459
PPL	0.383676	0.0305752	104	60.4373
IFT52	-0.589236	0.000293819	29	60.3529
AMT	-0.381164	0.0190918	92	60.2857
FTSJ1	0.268582	0.0159402	124	59.8644
CLASP2	-0.362035	0.00633607	75	59.6863
DHRS12	-0.255876	0.0310384	154	59.4266
ATG4C	-0.325039	0.0266273	116	59.3723
GKAP1	0.396551	0.0230497	91	59.0851
MMD	0.364188	0.0267907	103	58.9685
TRAF5	-0.486813	0.00963972	60	58.883
CAPN12	0.296208	0.047948	149	58.2242
CEP152	0.507467	0.0051714	50	58.0134
PUS3	0.374429	0.0314175	103	57.9583
SF3A2	0.381233	0.0213976	91	57.9233
BCORL1	0.480182	0.00114928	41	57.8728
TECPR2	0.394687	0.0142914	79	57.5252
TTC29	-0.443121	0.0227974	79	57.4848
PEX7	-0.460955	0.00507762	54	57.1097
PRPF3	0.237215	0.0258228	151	56.8813
HUS1	0.258285	0.0101457	110	56.6442
SCO2	0.425947	0.00621075	60	56.4002
NMD3	-0.274419	0.0466335	154	56.2615
GPD1L	-0.396933	0.0225037	86	56.2479
AKR1CL1	-0.782711	0.0368011	50	56.1258
HTR2A	-0.433777	0.0183783	74	55.715
SAFB2	0.340753	0.0215236	98	55.6703
ATP5L	-0.350204	0.0016369	57	55.6126
FAM168B	0.311031	0.0222134	108	55.5394
STARD5	-0.315398	0.00804466	84	55.4902
GPX3	0.275026	0.0239418	124	55.276
RNF14	-0.302803	0.0056065	81	55.2179
CDT1	-0.329344	0.0245302	104	55.1556
PTGER3	-0.383232	0.036396	100	55.1451
C1orf189	-0.808193	0.00057229	21	55.0299
IL26	-0.477364	0.00111055	39	55.0038
RTEL1	0.25866	0.0343794	145	54.8971
NUP85	0.387029	0.0227829	86	54.6661
SRRM2	0.313138	0.0259701	110	54.6137
ABHD14B	-0.322967	0.0319085	113	54.6003
SORD	-0.339186	0.026494	102	54.5544
NR2C2	-0.186624	0.0489537	223	54.5274
CAPN1	0.197262	0.0343341	188	54.3029
ACOX1	-0.277108	0.034561	134	54.266
C1orf158	-0.458439	0.0420612	86	54.2545
ZDHHC2	-0.291687	0.0365222	129	54.0876
SCARB2	0.191322	0.0269284	180	54.0604
SQRDL	0.268392	0.0192267	117	53.8885
EN2	0.633655	0.0215499	51	53.857
PPP2R2D	0.322414	0.0408537	120	53.7311
GNPDA2	-0.33997	0.00257829	61	53.6842
S1PR1	0.446128	0.0301181	79	53.6123
AGL	-0.310757	0.00792137	82	53.543
CHMP7	0.409852	0.00513277	57	53.4898
SAFB	0.350084	0.00485857	66	53.4545
GPRC5A	1.89309	0.000295947	8	53.4426
RSBN1L	0.275396	0.036093	134	53.2356
RUVBL2	0.254275	0.0458919	156	53.0848
IL10RB	0.334274	0.00395808	66	53.0045
SAGE1	0.862586	0.0155959	34	52.9952
SPARC	-0.319555	0.0495878	127	52.9462
NDUFS4	-0.395679	0.0123669	70	52.8396
INSL3	0.473595	0.0110976	57	52.7689
RUFY2	-0.241042	0.0120285	114	52.7534
NUP37	-0.314243	0.03188	112	52.669
VAT1L	-0.362843	0.0169806	82	52.6644
MLF1	-0.402428	0.0397395	93	52.4252
UQCRQ	-0.355199	0.00839361	71	52.3562
WDR61	-0.46869	0.0369708	78	52.356
TRIM32	-0.420066	0.0150172	68	52.0848
BACH1	0.267451	0.0399095	139	52.006
ZMYND12	-0.372193	0.0231731	85	51.726
EXOC1	-0.19231	0.0397317	192	51.7247
LAMB2	0.355736	0.0215801	87	51.5594
SPATA18	-0.473771	0.0189459	63	51.4121
PRPF4	0.267843	0.0186749	111	51.3964
TMPRSS3	-0.643154	0.00447508	34	51.3705
EXOC8	-0.259929	0.0415964	143	51.3294
GH2	0.333581	0.0187642	89	51.2626
TCAP	0.596129	0.022748	52	50.9326
KATNA1	0.629561	0.00418715	34	50.903
FUNDC1	-0.538867	0.00238052	36	50.8905
GGN	0.355129	0.0433061	104	50.3568
PAPD7	0.338098	0.0407446	107	50.2827
PPFIA4	0.840919	0.0123507	31	49.7467
RELT	0.491217	0.00216281	38	49.7452
MECR	-0.351339	0.0300697	93	49.7265
ITM2B	-0.323364	0.00642471	70	49.6203
CBFA2T2	0.256733	0.0239091	119	49.5369
YBX2	0.24149	0.0310437	136	49.5277
BRIX1	0.19094	0.0485407	197	49.4225
CDC23	-0.239382	0.0251639	129	49.3845
ZWINT	-0.371886	0.0169929	75	49.3604
FAM133A	-0.845954	0.0409598	42	49.303
SSTR2	0.533662	0.0458587	69	49.29
TTC27	-0.290269	0.0118922	88	49.1649
PCMTD2	-0.239909	0.0133049	109	49.0571
BTBD6	0.367683	0.00824571	64	49.0348
TOB1	-0.335093	0.0325455	98	48.8485
CLNS1A	-0.43151	0.00233475	43	48.832
FAM49A	0.461849	0.0139923	57	48.8102
APOO	-0.443476	0.00773446	52	48.6944
NOC4L	0.267976	0.0201001	107	48.6532
NLGN4X	0.579889	0.00907383	41	48.5545
ACSS3	-0.247472	0.0371671	137	48.4769
ARMCX5	-0.461317	0.00122416	36	48.3634
ELF2	0.276348	0.0451212	130	48.3417
POLR3D	0.470619	0.000218964	28	48.2241
PENK	-0.465328	0.04693	78	48.2205
TMEM173	-0.386037	0.0388648	88	47.9145
MAP4K4	0.269862	0.0286344	115	47.8892
JDP2	0.392536	0.0226863	74	47.7612
ME1	-0.33708	0.0335078	96	47.7258
IL15RA	0.537231	0.00137725	31	47.6474
SCYL3	-0.317857	0.00456259	64	47.6183
TARSL2	0.24738	0.0116229	99	47.3816
MARS2	-0.343586	0.0297962	90	47.1831
C17orf97	-0.405055	0.0185018	67	47.0255
DUOXA1	-0.265837	0.0327226	119	46.9822
MEST	-0.417089	0.0426589	82	46.8555
AKAP14	-0.628292	0.00853101	36	46.7977
SYTL4	0.80797	0.00233664	22	46.7742
GDPD3	0.634619	0.0193885	43	46.7306
UXS1	-0.298876	0.0348372	107	46.6251
PJA2	-0.314502	0.0275563	95	46.6026
ANKRD12	0.21795	0.020187	126	46.5456
GNS	-0.370552	0.0109015	64	46.5417
C22orf23	-0.388097	0.013936	64	46.0962
TLK2	0.241518	0.018421	110	46.0855
DBF4	0.283173	0.0211033	97	46.0264
ENY2	-0.52576	0.0300264	57	45.6266
WWC3	0.458826	0.00558681	44	45.4811
METTL2A	-0.536283	0.00854815	41	45.4732
NDN	-0.249583	0.0412814	131	45.2585
SMG5	0.71279	0.00140072	22	44.7492
GPX7	-0.394448	0.0480958	86	44.7062
MORN5	-0.487395	0.0452467	68	44.5577
DDX23	0.357967	0.0415137	90	44.5177
PLEKHG5	-0.313303	0.0333352	96	44.4268
EIF3G	0.316043	0.00863483	68	44.3518
POP1	0.449183	0.00215698	37	44.3109
TFCP2	-0.357454	0.0112017	63	43.9293
PACS1	0.366888	0.00403096	50	43.9274
GPSM1	0.30301	0.0173175	82	43.768
RCC2	0.426255	0.00656262	47	43.7326
NDUFA10	-0.389294	0.00627842	51	43.7215
SENP5	0.256347	0.0293754	111	43.5927
C19orf45	0.466776	0.0295771	61	43.537
ITGB3BP	-0.535907	0.0262229	51	43.2195
MRPL53	0.383036	0.00179829	41	43.111
ST3GAL5	0.441969	0.0103	49	43.0349
ANAPC13	-0.378814	0.0168299	64	43.0071
DACH2	-0.8172	0.0450352	39	42.9124
DUS3L	0.334714	0.0156829	71	42.8852
COPS4	-0.324074	0.0137274	71	42.8527
FBXO5	0.365598	0.0358378	81	42.8109
TOPBP1	0.21612	0.0245704	123	42.7872
SRM	0.271824	0.0102038	79	42.76
MRPS17	0.331062	0.00410733	54	42.6632
CPT2	-0.389788	0.0464282	82	42.6131
AGPS	-0.228564	0.0359747	129	42.576
C5orf48	0.412112	0.0401846	74	42.571
RPS14	-0.237667	0.0344629	122	42.41
CEP350	0.348926	0.0166767	68	42.184
USP42	0.285071	0.00284892	58	42.0846
DGAT1	0.299336	0.00920509	69	42.0513
OSCP1	-0.461389	0.0138099	49	42.0467
PDE6C	0.269349	0.0476007	118	42.0296
ARHGEF10L	0.4428	0.00272199	37	42.0258
MCCC1	-0.416902	0.0170829	57	42.0004
MRPS28	-0.322715	0.0100869	65	41.8741
MTG1	0.272126	0.0354409	106	41.8401
WDR55	0.367711	0.00799671	54	41.6406
CSPG5	-0.301952	0.0332575	93	41.5077
ABCF1	0.321693	0.0213412	77	41.3858
URB1	0.412781	0.00909207	49	41.2886
ELSPBP1	0.485018	0.0184658	49	41.2013
NHLRC1	-0.791468	0.00334087	21	41.1555
ADAT3	0.413931	0.0113123	51	41.0905
DOPEY1	-0.198898	0.0483847	157	41.0725
NFIC	0.246645	0.048104	126	40.9543
CARTPT	0.533412	0.0427925	56	40.8825
RAB1B	0.252102	0.0483705	122	40.4577
ATXN2L	0.354949	0.0158392	63	40.2572
GMPR2	-0.19831	0.0204242	120	40.2137
CAMKK1	0.257075	0.0315023	104	40.148
NDUFB6	-0.371166	0.0110142	55	39.9718
PCBP3	0.443721	0.00897075	44	39.9684
PSMG1	-0.382707	0.0209314	62	39.8438
GGT5	0.5663	0.00979756	35	39.817
FASTK	0.423829	0.00213496	35	39.6158
PARL	-0.300893	0.039861	94	39.582
RNF213	0.281386	0.0444142	104	39.5791
SRR	-0.229952	0.0347849	118	39.5785
TNFSF9	0.510226	0.036604	54	39.578
MCTP2	0.718157	0.0355243	38	39.5561
SLC25A5	-0.240679	0.0219362	99	39.5255
DHTKD1	-0.31669	0.0256209	78	39.3107
TCEA3	-0.321918	0.0409846	88	39.3028
OSTN	0.921002	0.0141197	23	39.1923
SCLT1	-0.251767	0.038804	110	39.0801
LSS	0.227123	0.0458281	128	38.9232
CENPT	0.3982	0.00367995	40	38.7713
HAUS1	-0.374202	0.0132169	55	38.6693
LRPPRC	-0.325348	0.0182777	68	38.4527
CCDC130	0.30339	0.0205201	75	38.4051
DZIP3	-0.399357	0.0166582	54	38.3511
GIMAP2	-0.327293	0.0157529	65	38.3494
CXorf36	0.506506	0.00197961	28	38.3403
MPPE1	-0.267817	0.0434179	105	38.3098
C16orf72	0.354667	0.00775147	51	38.1768
ANGPTL3	-0.395355	0.0230902	59	38.1746
GTPBP10	0.354233	0.0383728	76	38.1205
SLC25A19	0.342514	0.00949524	55	38.1003
CIRH1A	0.221893	0.0341893	117	38.0624
IGSF1	-0.693856	0.00322501	22	38.0319
PHKB	-0.336933	0.018351	65	38.0269
RRP1	0.245017	0.0378438	109	37.9772
ADK	-0.23291	0.0343499	111	37.8507
NDUFA6	-0.306389	0.0330975	83	37.6421
STIM1	0.228433	0.0148024	90	37.6161
COG8	-0.54406	0.00603325	31	37.4329
CENPN	0.277693	0.0151226	74	37.4073
FNDC3B	0.379889	0.00649279	45	37.3965
AKR1A1	-0.344874	0.0381564	76	37.1777
FAH	-0.322033	0.0112077	59	37.0591
NDUFA9	-0.254341	0.0398794	104	37.0123
THOC7	-0.267471	0.032161	92	36.7307
TMEM164	0.542677	0.00254638	26	36.6014
ITPRIP	1.21078	0.000167966	8	36.5634
MRPL19	-0.196615	0.0204861	110	36.5192
TMCC1	0.222753	0.0238523	101	36.5025
MSL3	0.250702	0.0167828	82	36.4925
CCDC70	0.255074	0.0182376	82	36.3737
SPSB4	-0.3871	0.0240798	58	36.3348
CASP14	0.233481	0.0408791	112	36.3091
HIGD2B	-0.282598	0.0321829	86	36.2698
PPOX	-0.284336	0.0304582	84	36.2155
SLC27A4	0.50421	0.0144367	39	36.1925
DARS2	-0.33497	0.0304838	71	36.0532
SAMD3	-0.489087	0.023649	45	35.7906
FAM92B	-0.769124	0.0352783	32	35.7487
PEX11G	-0.3891	0.0236492	56	35.4339
ADRA2A	-0.447633	0.0323021	53	35.3679
TIMM8A	-0.233588	0.0373407	106	35.3532
CCDC121	-0.509914	0.0424364	50	34.9868
NUP62CL	-0.448595	0.0429906	57	34.9445
RPS27	-0.262564	0.0138147	71	34.6679
NEK1	-0.246691	0.0105462	71	34.6257
USP36	0.366435	0.0178836	54	34.5795
DCTN3	-0.351519	0.0152883	54	34.4645
TM7SF2	-0.593379	0.00390257	24	34.3018
FBXL18	0.407306	0.0294361	55	34.2999
STRN3	-0.310889	0.0208769	65	33.9558
FCN2	0.376175	0.0133043	48	33.8739
ZNF593	0.333412	0.0306265	67	33.8185
TREML4	-0.910926	0.00681	17	33.5553
CTU2	0.325455	0.00163733	37	33.5469
TACC3	0.375319	0.0239126	55	33.4693
RNF130	0.26225	0.0224968	77	33.276
RNF138	-0.32874	0.0146081	55	33.1855
IFNAR2	0.309726	0.00876778	52	33.1313
MRPS35	-0.296836	0.0218396	67	33.0291
DPH5	-0.291776	0.0229895	69	32.9866
PUSL1	0.246757	0.0447537	99	32.9588
NOP16	0.282045	0.0241208	72	32.8492
MRPL27	-0.252295	0.0484211	99	32.8442
PDSS2	-0.318101	0.0494228	79	32.8216
GRM2	0.379705	0.0327749	58	32.692
CFHR3	0.43819	0.00739951	35	32.6793
DET1	-0.22116	0.0158172	82	32.6589
SERPINB13	-0.440496	0.0142327	40	32.5388
C12orf65	0.270561	0.0417676	87	32.4638
CCNY	0.289391	0.0046076	48	32.4561
MTMR1	-0.268614	0.0355382	83	32.3122
LPAR2	0.296693	0.0424017	79	32.1724
SNX27	0.220869	0.00895565	71	32.1146
MLYCD	0.384186	0.00551373	37	32.1051
MUS81	0.290952	0.0226841	67	32.0532
PEX2	-0.380227	0.00134458	29	31.6619
COPA	0.23949	0.0406101	95	31.6557
PRSS48	-0.612902	0.00717138	24	31.5433
MTCH2	-0.386635	0.0092115	40	31.4824
CWC25	0.244078	0.0234132	79	31.4403
CCL25	0.28485	0.0280766	71	31.3812
MBNL3	-0.377109	0.033375	56	31.1825
DAP3	-0.206275	0.0377667	105	30.8181
PROK1	0.431162	0.0147401	39	30.7972
RBBP6	0.258896	0.0259872	75	30.7809
PTGR1	0.416561	0.0162177	41	30.5716
MRPS33	-0.310269	0.0432909	72	30.462
EIF2B4	0.380731	0.00220272	30	30.3485
PEX6	0.515548	0.000855909	19	30.0481
GRM7	-0.371824	0.0261304	51	30.0157
MORN2	-0.7275	0.00114884	14	29.9413
SPCS1	-0.402508	0.0138809	40	29.9077
REPS2	0.481995	0.0389472	44	29.8929
SYTL5	-0.391601	0.0153766	42	29.8211
TGM7	-0.38825	0.033396	52	29.8051
RBM41	-0.353919	0.0374413	59	29.7902
CENPB	0.343031	0.00787458	41	29.588
PCBP1	0.204521	0.0346002	99	29.5802
AMMECR1	-0.374452	0.0306275	52	29.4777
SPOCD1	0.639017	0.0144308	25	29.4061
MRPS6	0.243593	0.0192198	70	29.2647
SLC2A13	-0.297724	0.00899066	48	29.2418
HIBADH	-0.284999	0.0212494	61	29.079
C11orf71	-0.396495	0.0132847	39	29.0192
OIT3	0.882914	0.018764	19	28.9656
PPFIA3	0.587764	0.00720436	23	28.9623
TACO1	-0.329265	0.00487675	38	28.9263
SLC25A12	-0.375317	0.0118878	40	28.8978
CIDEA	0.341855	0.00190714	31	28.8211
ZCCHC14	0.294474	0.0121234	51	28.7804
KIAA1524	-0.590233	0.0156413	27	28.7766
GOT1	-0.217621	0.037857	93	28.7765
KBTBD7	-0.298345	0.0262401	61	28.7733
FBXW5	0.29594	0.0420072	70	28.519
LHFPL1	-0.404388	0.025407	44	28.3808
IFNGR2	0.343926	0.0286837	53	28.1144
PSTPIP2	0.616512	0.0340413	31	28.0561
CD47	-0.234405	0.0307059	79	28.0136
C4BPB	-0.571031	0.0232412	30	27.9875
FMO4	-0.466548	0.00619062	27	27.817
RPP40	-0.466774	0.0248157	37	27.7241
PAK1IP1	0.183448	0.0462174	113	27.678
EBI3	0.55155	0.0458705	37	27.3146
SGMS1	-0.243511	0.0173259	63	27.0206
VPRBP	0.25132	0.0439264	78	26.6066
POLDIP3	0.245314	0.0273859	69	26.4475
DHRS11	-0.450071	0.0168364	33	26.3444
FAM9B	-0.526562	0.0342264	34	26.2395
MUC12	0.440331	0.0177108	34	26.2261
SCO1	-0.41877	0.0205152	37	26.1535
MEX3D	0.327671	0.0139475	43	26.1438
NASP	0.203267	0.0474249	97	26.105
DONSON	0.337729	0.0465438	58	26.0943
KIFAP3	-0.313486	0.0415775	60	25.9781
ADAL	-0.261039	0.0437169	72	25.5488
DBR1	-0.316457	0.01235	42	25.364
MTX2	-0.301508	0.00788772	40	25.3635
COX19	0.665079	0.00769791	18	25.3031
RNF19B	0.253712	0.0254127	62	25.0888
SEMA4B	0.487948	0.000633154	16	24.9711
NFU1	-0.217274	0.0399013	82	24.9254
EIF3I	-0.174996	0.0286951	91	24.5589
KIAA1257	-0.457195	0.0103411	27	24.5087
ENAM	-0.337481	0.0406362	52	24.4122
INMT	-0.476586	0.0381749	36	24.3326
ZC3H3	0.307162	0.0241882	49	24.3283
COG6	-0.300717	0.0107039	41	24.2945
ZNRF1	0.280421	0.0216299	52	24.2781
UBE2F	0.261571	0.0304155	61	24.2035
LPAR6	-0.49573	0.0370238	34	24.128
DNHD1	0.327442	0.00789612	35	24.0966
GDPD5	0.399583	0.0462847	45	23.9971
ZCCHC2	0.358974	0.00500156	29	23.9529
CISD3	0.428288	0.00217617	21	23.9449
SLC25A13	-0.31017	0.0231233	47	23.8489
TMEM115	0.436807	0.00665091	25	23.7745
NCR1	0.264252	0.0300077	59	23.7413
PNPLA4	-0.559901	0.0183016	24	23.348
NDUFA1	-0.241338	0.0259881	61	23.3371
BET1L	0.316005	0.0343017	50	23.1424
NGFRAP1	-0.20915	0.0489276	84	23.0227
PSRC1	0.445121	0.0221914	31	22.8206
EAPP	-0.226407	0.0334181	68	22.7243
CD160	0.419665	0.0160122	30	22.6059
FAR1	-0.213996	0.0191086	61	22.4365
GORASP1	0.312619	0.0234315	44	22.4238
C9orf24	-0.81499	0.0032956	11	22.2515
IVD	-0.288448	0.04468	57	22.1942
GTF2IRD1	0.287195	0.0117954	40	22.1518
DEFA5	-0.304724	0.0203935	42	21.6358
SLC25A43	-0.30254	0.0181893	41	21.5855
GTF2A2	-0.244236	0.026452	56	21.5763
BTN3A2	-0.409662	0.00795304	25	21.5018
MGAT4A	0.236499	0.0255776	57	21.4628
SASS6	0.249462	0.027557	55	21.4006
AMOT	-0.369924	0.0315935	38	21.0913
STX5	0.247908	0.00841347	41	21.0911
SEPT1	-0.199955	0.0447505	78	21.0428
NEK11	-0.535436	0.00856356	19	21.0317
PDCD2L	-0.326936	0.0319746	43	21.0198
NMB	0.367095	0.00791293	27	20.8308
TULP4	0.208589	0.0281796	64	20.6929
MTPAP	-0.32161	0.0476515	48	20.4069
MCTP1	0.347795	0.0191676	34	20.3087
CCDC147	-0.582562	0.0117264	18	20.247
IL5RA	-0.321479	0.0224171	38	20.1496
SYF2	-0.190432	0.0390633	75	20.1129
COX7A2L	-0.313081	0.00622735	29	20.0263
COX7A2	-0.273521	0.0378913	51	19.8288
ZMAT1	-0.455929	0.0245203	27	19.8251
FBXO10	0.232619	0.0256693	53	19.61
ABCD4	0.185545	0.0446831	78	19.5358
COX7C	-0.233898	0.0234531	51	19.4415
UBE2J2	0.206663	0.0306284	62	19.3975
KLHDC8B	-0.719295	0.00219797	10	19.1187
COX6C	-0.290433	0.0295379	43	19.1029
PRSS21	0.32869	0.0269084	37	19.095
COQ5	-0.265752	0.0255449	45	19.0468
TMEM140	0.486467	0.00932982	19	18.7642
SKA3	-0.254656	0.0395432	52	18.5777
PMFBP1	1.09433	5.83e-05	4	18.5355
GPR82	-0.778762	0.02609	15	18.4979
TMEM27	-0.723757	0.0108464	13	18.4857
SYCE2	0.490464	0.00323274	15	18.322
SMG6	0.302119	0.0129325	32	18.2559
RRAGB	-0.27463	0.0414115	48	18.2294
CDH7	-0.95506	0.0354666	13	18.0051
STX18	-0.295924	0.03079	40	17.8926
WDR1	0.213761	0.0303415	55	17.8464
KBTBD6	-0.238619	0.0492087	57	17.7899
POLD3	0.238088	0.0118456	38	17.4292
ZC4H2	-0.328569	0.0223729	32	17.3514
PHYH	-0.335064	0.0165436	29	17.3093
PATL1	0.350813	0.039234	35	17.2677
NDUFC1	-0.278462	0.0198463	36	17.0651
TSEN2	-0.365196	0.0163805	26	16.9551
RTP4	-0.596881	0.0324436	19	16.8849
SCRN3	-0.38674	0.0106335	22	16.7896
EFCAB10	-0.473131	0.0266777	22	16.382
PCID2	0.258824	0.0317345	42	16.2893
RNF113A	0.24284	0.0196254	39	16.1683
GRK6	0.199787	0.0302268	53	16.0907
PRCC	0.221821	0.0299245	47	15.8883
RBM33	0.23957	0.0313893	44	15.8456
HCRTR2	-0.371026	0.0473363	32	15.7292
MAST2	0.290264	0.0344629	37	15.7085
LEAP2	0.487757	0.0354982	22	15.5572
MRPL35	-0.248877	0.0318013	41	15.281
WDR18	0.269474	0.0382237	40	15.281
RILP	-0.325405	0.0146538	25	14.9202
C2orf47	-0.279005	0.0244403	33	14.841
FBXO25	0.236143	0.0494451	48	14.8019
MSI2	0.269017	0.0269309	35	14.7801
DEFA6	0.291926	0.0315045	33	14.466
KLHL14	-0.829455	0.0463864	13	14.3802
ETV7	0.35455	0.0357492	28	14.3623
FDX1	-0.192045	0.0462141	56	14.3597
SH3BGRL	-0.356327	0.01628	22	14.0192
SECISBP2L	-0.233392	0.0162629	33	13.7772
ATPAF1	-0.299159	0.0235119	28	13.6428
GTPBP6	0.207214	0.0175097	37	13.4687
TMEM31	0.328933	0.0319026	27	13.2878
HDHD2	-0.306204	0.00389069	18	13.283
CDK5RAP3	0.364183	0.0183664	21	13.2765
LEMD2	0.363598	0.0192018	21	13.1076
C2orf15	-0.608107	0.0220672	13	13.0933
SURF4	0.210859	0.0427367	45	12.9918
BNIPL	0.750957	0.0361935	12	12.9889
SLC25A29	0.523696	0.0296358	16	12.8049
ATAD3C	0.415853	0.0399704	22	12.7924
C17orf53	0.32539	0.0497585	30	12.7208
APOL3	0.402435	0.0430635	23	12.6427
PEX3	-0.23834	0.0355051	36	12.4388
GRSF1	-0.306171	0.0265175	25	12.0667
MRPS25	-0.310277	0.0293976	25	11.8812
RBM17	0.179978	0.0373808	46	11.817
MRPL44	-0.265381	0.0197219	26	11.7647
RPS19BP1	0.231019	0.0434882	37	11.6388
SEMA4C	0.40679	0.0173645	16	11.4574
ASXL2	0.214746	0.039631	38	11.4405
FBXO34	0.336944	0.00844842	16	11.177
KLHL18	0.254638	0.0106368	22	11.0539
DCTN5	0.203633	0.0410079	39	11.0161
APLF	0.239008	0.0499847	35	10.8846
DAZAP1	0.222366	0.0379098	34	10.7453
SLC6A14	-0.2915	0.0311256	24	10.5421
CCDC86	0.286145	0.0339442	25	10.5104
TMEM97	-0.461526	0.0305998	15	10.4832
HMGN5	-0.269263	0.0374329	27	10.3726
FAM57B	0.309057	0.0482561	25	10.1714
PRSS27	0.272664	0.0465863	28	10.1673
LYG1	1.10461	0.00111637	3	9.78308
RGS12	0.336656	0.0428376	21	9.6727
RELL1	0.252095	0.0469394	28	9.37717
C9orf40	0.39736	0.01545	13	9.35541
TTC18	-0.691855	0.03165	9	9.33771
NDUFAF1	-0.352448	0.0413025	19	9.26812
ZCRB1	-0.263953	0.00890242	17	9.20098
IL17C	0.342779	0.0469381	20	9.10745
GPR87	0.790024	0.0226631	7	9.09536
C19orf77	1.18776	0.000176052	2	8.91854
PPP1R1C	-0.371996	0.022229	14	8.60915
COPS7A	-0.278869	0.034555	21	8.55884
ABTB2	0.397386	0.00886552	10	8.15553
MTBP	-0.390022	0.00839471	10	8.09684
PLIN5	0.333743	0.0219769	14	7.74699
CTBS	-0.558769	3.12e-05	3	7.5524
SLC25A25	0.436824	0.0381424	12	7.4361
KLHL36	0.336687	0.0265331	14	7.42965
FBXO45	0.272186	0.0253181	17	7.38758
THUMPD2	0.22818	0.036138	22	7.23896
DCAF16	-0.484038	0.00355125	6	7.11425
PNMA6A	-0.271252	0.0207015	15	6.85183
STRA13	0.304957	0.0399781	16	6.82215
COLEC10	0.875721	0.0158019	4	6.30972
FAM46A	0.36773	0.0494168	13	6.24392
DDA1	-0.227336	0.0404092	18	5.70234
NIPAL3	0.255867	0.0192164	12	5.26981
KLHL29	0.32137	0.0245326	10	5.17489
CCDC58	-0.292145	0.0339842	12	5.14896
FAIM	-0.361298	0.0047122	6	5.04395
NIPAL2	0.285401	0.0454676	13	4.98021
IRAK1BP1	-0.346638	0.0266357	9	4.91215
DCAF5	0.210551	0.0166903	13	4.86539
OSGIN1	0.402296	0.00101391	4	4.8179
FAM185A	-0.283902	0.0448216	12	4.59415
TSPAN17	0.430845	0.0167775	6	4.58921
MUM1	0.417355	0.0176838	6	4.3883
EDDM3A	-0.721331	0.0348196	4	4.20731
NPM3	-0.213619	0.024541	12	4.12739
MPV17L	-0.379419	0.0288672	7	4.08906
GATS	0.290169	0.0295515	9	3.99411
CYB5D2	-0.407985	0.00457146	4	3.81865
C19orf24	0.34316	0.0259694	6	3.26455
SMAGP	0.320548	0.0456816	7	3.00732
TRPC4AP	0.196671	0.0426125	11	2.96484
PCDHGA9	0.206538	0.0399289	9	2.59999
GRIK4	0.242049	0.0339441	7	2.48939
TMEM185B	-0.317963	0.0281674	4	1.97169
FAM194B	-0.376802	0.00383613	2	1.82079
HN1	0.214991	0.0304615	5	1.6299
DEXI	0.339602	0.030583	3	1.543
TMEM60	-0.2035	0.0407596	2	0.565637
STEAP2	0.364767	0.0346148	1	0.532829
