# Supplementary material for: Analysis of transcription factor- and ncRNA-mediated potential pathogenic gene modules in Alzheimer’s disease
Source: Aging (Albany NY). 2019 Aug 16;11(16):6109–19. doi: 10.18632/aging.102169 (PMC6738443; doi:10.18632/aging.102169)
Supplement: Supplementary Table 3 [file aging-11-102169-s004.xlsx]

## Sheet: S4
module	ONTOLOGY	ID	Description	pvalue	p.adjust	qvalue	Count
m1	BP	GO:0046777	protein autophosphorylation	1.23853e-15	3.94594e-12	3.48352e-12	33
m1	BP	GO:0071900	regulation of protein serine/threonine kinase activity	1.90029e-15	3.94594e-12	3.48352e-12	50
m1	BP	GO:0043405	regulation of MAP kinase activity	5.55902e-13	7.69553e-10	6.7937e-10	37
m1	BP	GO:0035335	peptidyl-tyrosine dephosphorylation	7.50952e-13	7.79676e-10	6.88307e-10	21
m1	BP	GO:0032147	activation of protein kinase activity	9.73108e-12	8.08264e-09	7.13544e-09	34
m1	BP	GO:0043406	positive regulation of MAP kinase activity	3.10596e-11	2.14984e-08	1.89791e-08	30
m1	BP	GO:0031098	stress-activated protein kinase signaling cascade	4.31981e-10	2.56288e-07	2.26254e-07	30
m1	BP	GO:0071902	positive regulation of protein serine/threonine kinase activity	9.15821e-10	4.75426e-07	4.19711e-07	32
m1	BP	GO:0051403	stress-activated MAPK cascade	1.03354e-09	4.76921e-07	4.21031e-07	29
m1	BP	GO:0000187	activation of MAPK activity	1.22903e-09	5.10416e-07	4.50601e-07	21
m1	BP	GO:0006470	protein dephosphorylation	1.83174e-09	6.91566e-07	6.10522e-07	31
m1	BP	GO:0032615	interleukin-12 production	3.45571e-09	1.19596e-06	1.05581e-06	13
m1	BP	GO:0018105	peptidyl-serine phosphorylation	1.18542e-08	3.78695e-06	3.34316e-06	25
m1	BP	GO:0007254	JNK cascade	1.45354e-08	4.31183e-06	3.80653e-06	23
m1	BP	GO:0032655	regulation of interleukin-12 production	2.35051e-08	6.50778e-06	5.74514e-06	12
m1	BP	GO:0071901	negative regulation of protein serine/threonine kinase activity	6.31232e-08	1.63844e-05	1.44643e-05	18
m1	BP	GO:0018209	peptidyl-serine modification	6.72107e-08	1.64192e-05	1.4495e-05	25
m1	BP	GO:0046330	positive regulation of JNK cascade	8.6871e-08	2.00431e-05	1.76942e-05	17
m1	BP	GO:0070304	positive regulation of stress-activated protein kinase signaling cascade	1.05368e-07	2.30312e-05	2.03322e-05	19
m1	BP	GO:0043410	positive regulation of MAPK cascade	1.23228e-07	2.55883e-05	2.25896e-05	37
m1	BP	GO:0046328	regulation of JNK cascade	3.75004e-07	7.41615e-05	6.54706e-05	19
m1	BP	GO:0070302	regulation of stress-activated protein kinase signaling cascade	4.20914e-07	7.9457e-05	7.01456e-05	22
m1	BP	GO:0032874	positive regulation of stress-activated MAPK cascade	4.6821e-07	8.45425e-05	7.46351e-05	18
m1	BP	GO:0009187	cyclic nucleotide metabolic process	5.52509e-07	9.56071e-05	8.44031e-05	9
m1	BP	GO:0043507	positive regulation of JUN kinase activity	7.07537e-07	0.000117536	0.000103762	12
m1	BP	GO:0000186	activation of MAPKK activity	9.88351e-07	0.00015787	0.000139369	10
m1	BP	GO:0018107	peptidyl-threonine phosphorylation	1.04491e-06	0.000160723	0.000141888	14
m1	BP	GO:0016311	dephosphorylation	1.1385e-06	0.000168865	0.000149076	33
m1	BP	GO:0009214	cyclic nucleotide catabolic process	1.2935e-06	0.000185238	0.00016353	6
m1	BP	GO:0032872	regulation of stress-activated MAPK cascade	1.42046e-06	0.000196639	0.000173595	21
m1	BP	GO:0006469	negative regulation of protein kinase activity	1.64447e-06	0.000220306	0.000194488	21
m1	BP	GO:0035690	cellular response to drug	1.9137e-06	0.000248363	0.000219258	28
m1	BP	GO:0033673	negative regulation of kinase activity	2.07975e-06	0.000261734	0.000231061	22
m1	BP	GO:0018210	peptidyl-threonine modification	2.65147e-06	0.000320887	0.000283283	14
m1	BP	GO:0030099	myeloid cell differentiation	2.70432e-06	0.000320887	0.000283283	30
m1	BP	GO:0051348	negative regulation of transferase activity	3.65077e-06	0.000421157	0.000371802	23
m1	BP	GO:0002521	leukocyte differentiation	3.94013e-06	0.000442253	0.000390426	33
m1	BP	GO:0002224	toll-like receptor signaling pathway	4.75699e-06	0.000519889	0.000458964	16
m1	BP	GO:0007257	activation of JUN kinase activity	4.95547e-06	0.000525668	0.000464066	8
m1	BP	GO:0043506	regulation of JUN kinase activity	5.06302e-06	0.000525668	0.000464066	12
m1	BP	GO:0002755	MyD88-dependent toll-like receptor signaling pathway	6.21346e-06	0.000629378	0.000555622	8
m1	BP	GO:0007256	activation of JNKK activity	7.42395e-06	0.000734087	0.00064806	5
m1	BP	GO:0016575	histone deacetylation	7.98142e-06	0.000770856	0.000680521	10
m1	BP	GO:0006338	chromatin remodeling	1.02326e-05	0.000965819	0.000852636	16
m1	BP	GO:0006476	protein deacetylation	1.43214e-05	0.0013217	0.00116682	11
m1	BP	GO:1903829	positive regulation of cellular protein localization	1.55729e-05	0.00140596	0.0012412	24
m1	BP	GO:0051090	regulation of DNA-binding transcription factor activity	1.71784e-05	0.00149405	0.00131897	29
m1	BP	GO:0071496	cellular response to external stimulus	1.72681e-05	0.00149405	0.00131897	24
m1	BP	GO:0060419	heart growth	1.83978e-05	0.00155931	0.00137657	13
m1	BP	GO:0046058	cAMP metabolic process	1.97121e-05	0.00163729	0.00144541	6
m1	BP	GO:0018108	peptidyl-tyrosine phosphorylation	2.17652e-05	0.00177237	0.00156467	25
m1	BP	GO:0031663	lipopolysaccharide-mediated signaling pathway	2.30556e-05	0.00184135	0.00162556	9
m1	BP	GO:0018212	peptidyl-tyrosine modification	2.51449e-05	0.00197032	0.00173942	25
m1	BP	GO:0060420	regulation of heart growth	2.5893e-05	0.00199137	0.001758	11
m1	BP	GO:0032392	DNA geometric change	3.24002e-05	0.00244651	0.0021598	11
m1	BP	GO:0034123	positive regulation of toll-like receptor signaling pathway	3.49319e-05	0.00259058	0.00228699	6
m1	BP	GO:0035601	protein deacylation	3.61515e-05	0.00263398	0.00232531	11
m1	BP	GO:0098732	macromolecule deacylation	4.02711e-05	0.00286166	0.0025263	11
m1	BP	GO:0032735	positive regulation of interleukin-12 production	4.06544e-05	0.00286166	0.0025263	7
m1	BP	GO:0034134	toll-like receptor 2 signaling pathway	4.38894e-05	0.00303788	0.00268188	5
m1	BP	GO:0055017	cardiac muscle tissue growth	4.92846e-05	0.00335539	0.00296218	12
m1	BP	GO:0071260	cellular response to mechanical stimulus	6.4591e-05	0.00432655	0.00381953	10
m1	BP	GO:0048738	cardiac muscle tissue development	6.72755e-05	0.00443485	0.00391513	18
m1	BP	GO:0009154	purine ribonucleotide catabolic process	7.40788e-05	0.00480702	0.00424369	6
m1	BP	GO:0055021	regulation of cardiac muscle tissue growth	8.06222e-05	0.00515114	0.00454748	10
m1	BP	GO:0016572	histone phosphorylation	8.64125e-05	0.00543744	0.00480023	7
m1	BP	GO:1904375	regulation of protein localization to cell periphery	9.24305e-05	0.00567767	0.00501231	12
m1	BP	GO:0009261	ribonucleotide catabolic process	9.29646e-05	0.00567767	0.00501231	6
m1	BP	GO:1903707	negative regulation of hemopoiesis	0.000117697	0.00708401	0.00625385	14
m1	BP	GO:0060038	cardiac muscle cell proliferation	0.000128715	0.00763649	0.00674158	9
m1	BP	GO:0016569	covalent chromatin modification	0.000130581	0.00763806	0.00674297	27
m1	BP	GO:0051091	positive regulation of DNA-binding transcription factor activity	0.000154395	0.00890559	0.00786195	19
m1	BP	GO:0030098	lymphocyte differentiation	0.000172748	0.00958813	0.00846451	22
m1	BP	GO:0007143	female meiotic nuclear division	0.000173422	0.00958813	0.00846451	6
m1	BP	GO:0002221	pattern recognition receptor signaling pathway	0.000174105	0.00958813	0.00846451	16
m1	BP	GO:0071322	cellular response to carbohydrate stimulus	0.000175463	0.00958813	0.00846451	13
m1	BP	GO:0034121	regulation of toll-like receptor signaling pathway	0.000180368	0.00960344	0.00847802	9
m1	BP	GO:0043407	negative regulation of MAP kinase activity	0.000180368	0.00960344	0.00847802	9
m1	CC	GO:0015629	actin cytoskeleton	3.43664e-09	1.42964e-06	1.23357e-06	35
m1	CC	GO:0016459	myosin complex	6.67472e-06	0.00102985	0.000888614	10
m1	CC	GO:0005912	adherens junction	7.42683e-06	0.00102985	0.000888614	31
m1	CC	GO:0005925	focal adhesion	1.82425e-05	0.00165511	0.00142812	26
m1	CC	GO:0005924	cell-substrate adherens junction	1.98931e-05	0.00165511	0.00142812	26
m1	CC	GO:0030055	cell-substrate junction	2.46282e-05	0.00170756	0.00147337	26
m1	CC	GO:1902911	protein kinase complex	3.09243e-05	0.00183779	0.00158574	10
m1	MF	GO:0004674	protein serine/threonine kinase activity	4.80029e-27	2.24174e-24	1.74327e-24	60
m1	MF	GO:0004713	protein tyrosine kinase activity	1.4028e-13	3.27555e-11	2.5472e-11	24
m1	MF	GO:0004721	phosphoprotein phosphatase activity	1.37573e-12	2.14156e-10	1.66536e-10	26
m1	MF	GO:0042578	phosphoric ester hydrolase activity	1.17518e-11	1.37203e-09	1.06694e-09	35
m1	MF	GO:0004725	protein tyrosine phosphatase activity	2.76613e-11	2.58356e-09	2.00908e-09	19
m1	MF	GO:0000287	magnesium ion binding	3.6924e-11	2.87392e-09	2.23487e-09	28
m1	MF	GO:0016791	phosphatase activity	1.92714e-10	1.28568e-08	9.99794e-09	28
m1	MF	GO:0003774	motor activity	1.14287e-08	6.67148e-07	5.18801e-07	17
m1	MF	GO:0004714	transmembrane receptor protein tyrosine kinase activity	1.67192e-08	8.67541e-07	6.74634e-07	12
m1	MF	GO:0050321	tau-protein kinase activity	9.36353e-08	4.07106e-06	3.16582e-06	8
m1	MF	GO:0004715	non-membrane spanning protein tyrosine kinase activity	9.58922e-08	4.07106e-06	3.16582e-06	10
m1	MF	GO:0019199	transmembrane receptor protein kinase activity	4.70537e-07	1.83117e-05	1.42399e-05	12
m1	MF	GO:0003779	actin binding	5.74147e-07	2.06251e-05	1.60389e-05	30
m1	MF	GO:0004709	MAP kinase kinase kinase activity	1.20413e-06	4.01664e-05	3.1235e-05	7
m1	MF	GO:0004112	cyclic-nucleotide phosphodiesterase activity	2.51357e-06	7.33647e-05	5.70514e-05	7
m1	MF	GO:0004114	3',5'-cyclic-nucleotide phosphodiesterase activity	2.51357e-06	7.33647e-05	5.70514e-05	7
m1	MF	GO:0019001	guanyl nucleotide binding	3.00827e-06	7.80478e-05	6.06931e-05	27
m1	MF	GO:0032561	guanyl ribonucleotide binding	3.00827e-06	7.80478e-05	6.06931e-05	27
m1	MF	GO:0004707	MAP kinase activity	5.45163e-06	0.000133995	0.0001042	5
m1	MF	GO:0000987	proximal promoter sequence-specific DNA binding	7.57096e-06	0.000176782	0.000137473	32
m1	MF	GO:0001227	DNA-binding transcription repressor activity, RNA polymerase II-specific	1.56659e-05	0.00034838	0.000270914	20
m1	MF	GO:0000978	RNA polymerase II proximal promoter sequence-specific DNA binding	2.10652e-05	0.000433563	0.000337156	30
m1	MF	GO:0004712	protein serine/threonine/tyrosine kinase activity	2.13532e-05	0.000433563	0.000337156	8
m1	MF	GO:0003682	chromatin binding	2.6171e-05	0.000509245	0.000396009	30
m1	MF	GO:0042623	ATPase activity, coupled	3.55458e-05	0.000650389	0.000505768	19
m1	MF	GO:0000146	microfilament motor activity	3.62101e-05	0.000650389	0.000505768	6
m1	MF	GO:0030551	cyclic nucleotide binding	3.81769e-05	0.00066032	0.000513491	7
m1	MF	GO:0016887	ATPase activity	4.36129e-05	0.000727401	0.000565656	22
m1	MF	GO:0048156	tau protein binding	5.24282e-05	0.000844275	0.000656542	8
m1	MF	GO:0097472	cyclin-dependent protein kinase activity	5.73038e-05	0.000892029	0.000693677	5
m1	MF	GO:0005525	GTP binding	8.25409e-05	0.00124344	0.000966947	23
m1	MF	GO:0032550	purine ribonucleoside binding	0.000104753	0.00152875	0.00118881	23
m1	MF	GO:0001883	purine nucleoside binding	0.000120503	0.00168112	0.0013073	23
m1	MF	GO:0008138	protein tyrosine/serine/threonine phosphatase activity	0.000122394	0.00168112	0.0013073	7
m1	MF	GO:0032549	ribonucleoside binding	0.000126201	0.00168389	0.00130946	23
m1	MF	GO:0004386	helicase activity	0.000132146	0.00171422	0.00133305	13
m1	MF	GO:0003924	GTPase activity	0.000160363	0.00202404	0.00157397	18
m1	MF	GO:0001882	nucleoside binding	0.000173261	0.00212928	0.00165581	23
m1	MF	GO:0030552	cAMP binding	0.000261079	0.00312625	0.0024311	5
m1	MF	GO:0003777	microtubule motor activity	0.000274368	0.00320325	0.00249097	7
m1	MF	GO:0004407	histone deacetylase activity	0.000334222	0.00363089	0.00282352	5
m1	MF	GO:0030553	cGMP binding	0.000334322	0.00363089	0.00282352	4
m1	MF	GO:0047555	3',5'-cyclic-GMP phosphodiesterase activity	0.000334322	0.00363089	0.00282352	4
m1	MF	GO:0001228	DNA-binding transcription activator activity, RNA polymerase II-specific	0.000348127	0.00369489	0.0028733	25
m1	MF	GO:0051219	phosphoprotein binding	0.000456922	0.00474183	0.00368744	9
m1	MF	GO:0004708	MAP kinase kinase activity	0.000471433	0.00478607	0.00372184	4
m1	MF	GO:0033558	protein deacetylase activity	0.000525796	0.0052244	0.0040627	5
m1	MF	GO:0004722	protein serine/threonine phosphatase activity	0.000625858	0.00601811	0.00467992	7
m1	MF	GO:0004693	cyclin-dependent protein serine/threonine kinase activity	0.000644337	0.00601811	0.00467992	4
m1	MF	GO:0035173	histone kinase activity	0.000644337	0.00601811	0.00467992	4
m1	MF	GO:0001784	phosphotyrosine residue binding	0.00076868	0.0070387	0.00547357	6
m1	MF	GO:0042826	histone deacetylase binding	0.00101818	0.00914402	0.00711076	10
m1	MF	GO:0004697	protein kinase C activity	0.00111664	0.00983909	0.00765127	4
m2	BP	GO:0051321	meiotic cell cycle	2.11183e-07	4.87599e-05	4.42932e-05	8
m2	BP	GO:0140013	meiotic nuclear division	2.84315e-07	4.87599e-05	4.42932e-05	7
m2	BP	GO:1903046	meiotic cell cycle process	4.31699e-07	4.93576e-05	4.48361e-05	7
m2	BP	GO:0070192	chromosome organization involved in meiotic cell cycle	5.78026e-07	4.95658e-05	4.50252e-05	5
m2	BP	GO:0045132	meiotic chromosome segregation	2.07281e-06	0.000142194	0.000129169	5
m2	BP	GO:0007129	synapsis	7.19888e-06	0.000359456	0.000326527	4
m2	BP	GO:0022412	cellular process involved in reproduction in multicellular organism	7.33583e-06	0.000359456	0.000326527	8
m2	BP	GO:0045143	homologous chromosome segregation	1.38236e-05	0.000592685	0.000538392	4
m2	BP	GO:0003351	epithelial cilium movement	3.69837e-05	0.00140949	0.00128037	3
m2	BP	GO:0098813	nuclear chromosome segregation	6.2355e-05	0.00213878	0.00194285	6
m2	BP	GO:0000280	nuclear division	0.000117942	0.00367766	0.00334076	7
m2	BP	GO:0007127	meiosis I	0.000164341	0.00459335	0.00417257	4
m2	BP	GO:0061982	meiosis I cell cycle process	0.000187055	0.00459335	0.00417257	4
m2	BP	GO:0009566	fertilization	0.000187484	0.00459335	0.00417257	5
m2	BP	GO:0007059	chromosome segregation	0.000211435	0.00471154	0.00427993	6
m2	BP	GO:0048285	organelle fission	0.00021978	0.00471154	0.00427993	7
m2	CC	GO:0031514	motile cilium	3.57139e-08	2.85711e-06	2.3308e-06	8
m2	CC	GO:0097223	sperm part	7.74894e-08	3.09957e-06	2.5286e-06	8
m2	CC	GO:0036126	sperm flagellum	6.19754e-06	0.000164695	0.000134356	5
m2	CC	GO:0097729	9+2 motile cilium	8.23474e-06	0.000164695	0.000134356	5
m2	CC	GO:0044441	ciliary part	4.0255e-05	0.00064408	0.000525434	8
m2	CC	GO:0000795	synaptonemal complex	0.000158795	0.0018148	0.0014805	3
m2	CC	GO:0099086	synaptonemal structure	0.000158795	0.0018148	0.0014805	3
m2	CC	GO:0001669	acrosomal vesicle	0.000294377	0.00294377	0.0024015	4
m2	CC	GO:0033391	chromatoid body	0.000723121	0.00642774	0.00524368	2
m3	CC	GO:0044438	microbody part	2.60496e-05	0.00356879	0.00331789	7
m3	CC	GO:0044439	peroxisomal part	2.60496e-05	0.00356879	0.00331789	7
m3	CC	GO:0005782	peroxisomal matrix	8.56453e-05	0.0058667	0.00545425	5
m3	CC	GO:0031907	microbody lumen	8.56453e-05	0.0058667	0.00545425	5
m3	CC	GO:0005777	peroxisome	0.000157132	0.00717568	0.0066712	7
m3	CC	GO:0042579	microbody	0.000157132	0.00717568	0.0066712	7
m4	BP	GO:0000209	protein polyubiquitination	7.66951e-24	2.76869e-21	2.648e-21	20
m4	BP	GO:0043687	post-translational protein modification	6.84475e-22	1.23548e-19	1.18162e-19	20
m4	BP	GO:0043161	proteasome-mediated ubiquitin-dependent protein catabolic process	1.30435e-08	1.56956e-06	1.50114e-06	10
m4	BP	GO:0010498	proteasomal protein catabolic process	5.49581e-08	4.95997e-06	4.74375e-06	10
m4	BP	GO:0070979	protein K11-linked ubiquitination	5.64351e-05	0.00407462	0.00389699	3
m4	CC	GO:0000151	ubiquitin ligase complex	1.71312e-19	1.11353e-17	9.55742e-18	16
m4	CC	GO:0031461	cullin-RING ubiquitin ligase complex	4.04891e-18	1.3159e-16	1.12943e-16	13
m4	CC	GO:0080008	Cul4-RING E3 ubiquitin ligase complex	9.46304e-11	2.05032e-09	1.75979e-09	6
m4	CC	GO:0031463	Cul3-RING ubiquitin ligase complex	9.01245e-05	0.00127915	0.00109789	3
m4	CC	GO:0019005	SCF ubiquitin ligase complex	9.8396e-05	0.00127915	0.00109789	3
m4	CC	GO:0031464	Cul4A-RING E3 ubiquitin ligase complex	0.000419869	0.00454858	0.00390404	2
m4	MF	GO:0019787	ubiquitin-like protein transferase activity	4.1244e-25	1.85598e-23	1.34586e-23	21
m4	MF	GO:0004842	ubiquitin-protein transferase activity	2.13268e-22	4.79853e-21	3.47964e-21	19
m4	MF	GO:0061630	ubiquitin protein ligase activity	1.88462e-09	2.82693e-08	2.04993e-08	8
m4	MF	GO:0061659	ubiquitin-like protein ligase activity	2.63632e-09	2.96586e-08	2.15068e-08	8
m4	MF	GO:0061650	ubiquitin-like protein conjugating enzyme activity	2.59099e-05	0.000233189	0.000169096	3
m4	MF	GO:0015095	magnesium ion transmembrane transporter activity	0.000735901	0.00551926	0.00400227	2
m4	MF	GO:0061631	ubiquitin conjugating enzyme activity	0.00127751	0.00821258	0.00595532	2
m5	BP	GO:0034470	ncRNA processing	3.10317e-45	2.20946e-42	2.06769e-42	39
m5	BP	GO:0034660	ncRNA metabolic process	1.47713e-44	5.25857e-42	4.92116e-42	44
m5	BP	GO:0042254	ribosome biogenesis	3.26568e-34	7.75054e-32	7.25324e-32	29
m5	BP	GO:0022613	ribonucleoprotein complex biogenesis	1.24571e-31	2.21736e-29	2.07509e-29	33
m5	BP	GO:0016072	rRNA metabolic process	8.15942e-27	1.1619e-24	1.08735e-24	24
m5	BP	GO:0006364	rRNA processing	7.14709e-26	8.48121e-24	7.93703e-24	22
m5	BP	GO:0008033	tRNA processing	4.29159e-21	4.36516e-19	4.08508e-19	17
m5	BP	GO:0006399	tRNA metabolic process	7.95597e-21	7.08081e-19	6.62648e-19	19
m5	BP	GO:0009451	RNA modification	5.95969e-17	4.71478e-15	4.41226e-15	15
m5	BP	GO:0006400	tRNA modification	2.97689e-16	2.11955e-14	1.98355e-14	12
m5	BP	GO:0090501	RNA phosphodiester bond hydrolysis	3.05102e-08	1.97484e-06	1.84813e-06	9
m5	BP	GO:0030488	tRNA methylation	1.40375e-07	8.32892e-06	7.79451e-06	5
m5	BP	GO:0090305	nucleic acid phosphodiester bond hydrolysis	1.57828e-07	8.64413e-06	8.08949e-06	11
m5	BP	GO:0001510	RNA methylation	4.67002e-07	2.37504e-05	2.22265e-05	6
m5	BP	GO:0001522	pseudouridine synthesis	6.83692e-07	3.24526e-05	3.03703e-05	4
m5	BP	GO:0090502	RNA phosphodiester bond hydrolysis, endonucleolytic	1.7779e-06	7.91167e-05	7.40404e-05	6
m5	BP	GO:0045943	positive regulation of transcription by RNA polymerase I	4.83802e-06	0.000202628	0.000189627	4
m5	BP	GO:0032259	methylation	1.05657e-05	0.000417931	0.000391116	10
m5	BP	GO:0042273	ribosomal large subunit biogenesis	1.13764e-05	0.000426316	0.000398962	4
m5	BP	GO:0043414	macromolecule methylation	1.45653e-05	0.000518524	0.000485254	9
m5	BP	GO:0006360	transcription by RNA polymerase I	1.82612e-05	0.000619143	0.000579417	5
m5	BP	GO:0006356	regulation of transcription by RNA polymerase I	2.28469e-05	0.000739408	0.000691965	4
m5	BP	GO:2000232	regulation of rRNA processing	2.97494e-05	0.000914064	0.000855414	3
m5	BP	GO:0002181	cytoplasmic translation	3.08111e-05	0.000914064	0.000855414	5
m5	BP	GO:0090069	regulation of ribosome biogenesis	3.85271e-05	0.00109725	0.00102685	3
m5	BP	GO:0001732	formation of cytoplasmic translation initiation complex	4.88481e-05	0.00133769	0.00125186	3
m5	BP	GO:0000956	nuclear-transcribed mRNA catabolic process	7.98169e-05	0.0021048	0.00196975	7
m5	BP	GO:0022618	ribonucleoprotein complex assembly	0.000115472	0.00293628	0.00274788	7
m5	BP	GO:0006401	RNA catabolic process	0.000135217	0.00331981	0.0031068	9
m5	BP	GO:0071826	ribonucleoprotein complex subunit organization	0.000163128	0.00387157	0.00362316	7
m5	BP	GO:0042255	ribosome assembly	0.000333343	0.00765614	0.0071649	3
m5	BP	GO:0002183	cytoplasmic translational initiation	0.000373589	0.00831236	0.00777901	3
m5	BP	GO:0006413	translational initiation	0.00040517	0.00874186	0.00818095	6
m5	CC	GO:0044452	nucleolar part	1.39296e-06	0.000149047	0.000123167	8
m5	CC	GO:0016282	eukaryotic 43S preinitiation complex	5.0394e-05	0.00111905	0.000924741	3
m5	CC	GO:0030684	preribosome	5.0394e-05	0.00111905	0.000924741	3
m5	CC	GO:0033290	eukaryotic 48S preinitiation complex	5.0394e-05	0.00111905	0.000924741	3
m5	CC	GO:0005852	eukaryotic translation initiation factor 3 complex	6.27503e-05	0.00111905	0.000924741	3
m5	CC	GO:0070993	translation preinitiation complex	6.27503e-05	0.00111905	0.000924741	3
m5	CC	GO:0005732	small nucleolar ribonucleoprotein complex	0.00034371	0.00525385	0.0043416	3
m5	MF	GO:0140098	catalytic activity, acting on RNA	8.25077e-14	1.19636e-11	8.07707e-12	18
m5	MF	GO:0140101	catalytic activity, acting on a tRNA	3.26307e-11	2.36573e-09	1.59719e-09	11
m5	MF	GO:0000049	tRNA binding	1.77263e-08	8.56773e-07	5.78439e-07	7
m5	MF	GO:0008175	tRNA methyltransferase activity	3.67215e-07	1.33115e-05	8.98709e-06	5
m5	MF	GO:0030515	snoRNA binding	6.9503e-06	0.000201559	0.00013608	4
m5	MF	GO:0008173	RNA methyltransferase activity	1.31026e-05	0.000316646	0.000213779	5
m5	MF	GO:0004386	helicase activity	1.74715e-05	0.000361909	0.000244338	7
m5	MF	GO:0009982	pseudouridine synthase activity	2.91253e-05	0.000527896	0.000356402	3
m5	MF	GO:0003724	RNA helicase activity	6.21182e-05	0.00097359	0.000657306	4
m5	MF	GO:0008135	translation factor activity, RNA binding	6.71441e-05	0.00097359	0.000657306	5
m5	MF	GO:0004518	nuclease activity	0.000110731	0.00145964	0.000985455	7
m5	MF	GO:0003743	translation initiation factor activity	0.000131081	0.0015839	0.00106935	4
m5	MF	GO:0032549	ribonucleoside binding	0.00021512	0.00224733	0.00151725	9
m5	MF	GO:0008168	methyltransferase activity	0.000219377	0.00224733	0.00151725	7
m5	MF	GO:0008757	S-adenosylmethionine-dependent methyltransferase activity	0.000232482	0.00224733	0.00151725	6
m5	MF	GO:0001882	nucleoside binding	0.000252247	0.00228599	0.00154335	9
m5	MF	GO:0016741	transferase activity, transferring one-carbon groups	0.000299395	0.00230018	0.00155293	7
m5	MF	GO:0016866	intramolecular transferase activity	0.000306751	0.00230018	0.00155293	3
m5	MF	GO:0008026	ATP-dependent helicase activity	0.000332094	0.00230018	0.00155293	4
m5	MF	GO:0070035	purine NTP-dependent helicase activity	0.000332094	0.00230018	0.00155293	4
m5	MF	GO:0004540	ribonuclease activity	0.000333129	0.00230018	0.00155293	5
m5	MF	GO:0016887	ATPase activity	0.000421133	0.00277565	0.00187394	8
m5	MF	GO:0004004	ATP-dependent RNA helicase activity	0.000520742	0.00328294	0.00221643	3
m5	MF	GO:0008186	RNA-dependent ATPase activity	0.0007315	0.00441948	0.00298375	3
m5	MF	GO:0005525	GTP binding	0.000873739	0.00487406	0.00329065	8
m5	MF	GO:0004527	exonuclease activity	0.000873969	0.00487406	0.00329065	4
m5	MF	GO:0032550	purine ribonucleoside binding	0.000967702	0.00512614	0.00346084	8
m5	MF	GO:0016891	endoribonuclease activity, producing 5'-phosphomonoesters	0.000989876	0.00512614	0.00346084	3
m5	MF	GO:0001883	purine nucleoside binding	0.00102786	0.00513931	0.00346973	8
m5	MF	GO:0016853	isomerase activity	0.00109311	0.00528336	0.00356699	5
m5	MF	GO:0019001	guanyl nucleotide binding	0.00125039	0.00566581	0.00382519	8
m5	MF	GO:0032561	guanyl ribonucleotide binding	0.00125039	0.00566581	0.00382519	8
m5	MF	GO:0004812	aminoacyl-tRNA ligase activity	0.00141496	0.00603437	0.00407402	3
m5	MF	GO:0016875	ligase activity, forming carbon-oxygen bonds	0.00141496	0.00603437	0.00407402	3
m5	MF	GO:0033204	ribonuclease P RNA binding	0.00174685	0.00723697	0.00488594	2
m5	MF	GO:0016893	endonuclease activity, active with either ribo- or deoxyribonucleic acids and producing 5'-phosphomonoesters	0.00193965	0.00781248	0.00527449	3
m5	MF	GO:0004526	ribonuclease P activity	0.00254084	0.00995736	0.00672257	2
m6	MF	GO:0017016	Ras GTPase binding	3.17857e-05	0.00511843	0.00468506	10
m6	MF	GO:0031267	small GTPase binding	4.45081e-05	0.00511843	0.00468506	10
m8	BP	GO:0007187	G protein-coupled receptor signaling pathway, coupled to cyclic nucleotide second messenger	7.7882e-21	8.30222e-18	5.86165e-18	16
m8	BP	GO:0007188	adenylate cyclase-modulating G protein-coupled receptor signaling pathway	9.66873e-20	5.15343e-17	3.6385e-17	15
m8	BP	GO:0007193	adenylate cyclase-inhibiting G protein-coupled receptor signaling pathway	3.99662e-17	1.42013e-14	1.00266e-14	11
m8	BP	GO:0007200	phospholipase C-activating G protein-coupled receptor signaling pathway	2.47105e-15	6.58536e-13	4.64948e-13	10
m8	BP	GO:0051480	regulation of cytosolic calcium ion concentration	2.12099e-10	4.52195e-08	3.19265e-08	11
m8	BP	GO:0007204	positive regulation of cytosolic calcium ion concentration	1.16531e-09	2.07037e-07	1.46175e-07	10
m8	BP	GO:0019932	second-messenger-mediated signaling	2.15519e-09	3.28204e-07	2.31723e-07	11
m8	BP	GO:0006874	cellular calcium ion homeostasis	3.30131e-09	4.399e-07	3.10584e-07	11
m8	BP	GO:0055074	calcium ion homeostasis	4.7077e-09	5.57601e-07	3.93685e-07	11
m8	BP	GO:0072503	cellular divalent inorganic cation homeostasis	5.23727e-09	5.58293e-07	3.94173e-07	11
m8	BP	GO:0072507	divalent inorganic cation homeostasis	8.77249e-09	8.50134e-07	6.00223e-07	11
m8	BP	GO:0060326	cell chemotaxis	2.01273e-08	1.78797e-06	1.26237e-06	9
m8	BP	GO:0006875	cellular metal ion homeostasis	3.18161e-08	2.56091e-06	1.80809e-06	11
m8	BP	GO:0051952	regulation of amine transport	3.36329e-08	2.56091e-06	1.80809e-06	6
m8	BP	GO:0015837	amine transport	5.08253e-08	3.61199e-06	2.55018e-06	6
m8	BP	GO:0050433	regulation of catecholamine secretion	5.99558e-08	3.99455e-06	2.82029e-06	5
m8	BP	GO:0050432	catecholamine secretion	7.77258e-08	4.77624e-06	3.37219e-06	5
m8	BP	GO:0051482	positive regulation of cytosolic calcium ion concentration involved in phospholipase C-activating G protein-coupled signaling pathway	8.06495e-08	4.77624e-06	3.37219e-06	4
m8	BP	GO:0051937	catecholamine transport	3.19581e-07	1.79302e-05	1.26593e-05	5
m8	BP	GO:0006939	smooth muscle contraction	3.52926e-07	1.7999e-05	1.27079e-05	6
m8	BP	GO:0050900	leukocyte migration	3.54578e-07	1.7999e-05	1.27079e-05	10
m8	BP	GO:0051953	negative regulation of amine transport	3.87027e-07	1.87532e-05	1.32404e-05	4
m8	BP	GO:0002685	regulation of leukocyte migration	5.9733e-07	2.7685e-05	1.95465e-05	7
m8	BP	GO:0015844	monoamine transport	8.81667e-07	3.91607e-05	2.76488e-05	5
m8	BP	GO:0007216	G protein-coupled glutamate receptor signaling pathway	2.93493e-06	0.000125145	8.83567e-05	3
m8	BP	GO:0007215	glutamate receptor signaling pathway	3.49523e-06	0.000143304	0.000101178	5
m8	BP	GO:0071073	positive regulation of phospholipid biosynthetic process	3.90587e-06	0.000154209	0.000108877	3
m8	BP	GO:0033604	negative regulation of catecholamine secretion	5.06806e-06	0.000189093	0.000133506	3
m8	BP	GO:0019935	cyclic-nucleotide-mediated signaling	5.14418e-06	0.000189093	0.000133506	6
m8	BP	GO:0043410	positive regulation of MAPK cascade	5.99325e-06	0.00021296	0.000150357	9
m8	BP	GO:0035589	G protein-coupled purinergic nucleotide receptor signaling pathway	6.43812e-06	0.000221388	0.000156307	3
m8	BP	GO:0019233	sensory perception of pain	7.28567e-06	0.000242704	0.000171357	5
m8	BP	GO:0014061	regulation of norepinephrine secretion	8.0325e-06	0.000253859	0.000179233	3
m8	BP	GO:1903727	positive regulation of phospholipid metabolic process	8.0968e-06	0.000253859	0.000179233	4
m8	BP	GO:0048243	norepinephrine secretion	9.86754e-06	0.000300537	0.000212189	3
m8	BP	GO:0030595	leukocyte chemotaxis	1.04969e-05	0.000310825	0.000219453	6
m8	BP	GO:0019229	regulation of vasoconstriction	1.20659e-05	0.000347627	0.000245437	4
m8	BP	GO:0071071	regulation of phospholipid biosynthetic process	1.69781e-05	0.000476281	0.00033627	3
m8	BP	GO:0002687	positive regulation of leukocyte migration	1.75679e-05	0.000480189	0.000339029	5
m8	BP	GO:0015874	norepinephrine transport	1.99367e-05	0.000531312	0.000375124	3
m8	BP	GO:0035590	purinergic nucleotide receptor signaling pathway	2.68307e-05	0.000697599	0.000492528	3
m8	BP	GO:0007218	neuropeptide signaling pathway	2.89489e-05	0.00073475	0.000518758	4
m8	BP	GO:0051048	negative regulation of secretion	2.97478e-05	0.000737469	0.000520678	6
m8	BP	GO:0035588	G protein-coupled purinergic receptor signaling pathway	3.07973e-05	0.000746135	0.000526796	3
m8	BP	GO:0042310	vasoconstriction	3.86462e-05	0.000909943	0.00064245	4
m8	BP	GO:0019933	cAMP-mediated signaling	3.92658e-05	0.000909943	0.00064245	5
m8	BP	GO:0043406	positive regulation of MAP kinase activity	5.22708e-05	0.00118555	0.000837035	6
m8	BP	GO:0097756	negative regulation of blood vessel diameter	5.88302e-05	0.00130652	0.000922448	4
m8	BP	GO:0007202	activation of phospholipase C activity	6.96782e-05	0.00151586	0.00107024	3
m8	BP	GO:0035587	purinergic receptor signaling pathway	7.69986e-05	0.00164161	0.00115903	3
m8	BP	GO:1903725	regulation of phospholipid metabolic process	8.20136e-05	0.00171424	0.00121031	4
m8	BP	GO:0097529	myeloid leukocyte migration	8.93416e-05	0.0018315	0.0012931	5
m8	BP	GO:0006816	calcium ion transport	0.000110441	0.00222131	0.00156832	7
m8	BP	GO:0007189	adenylate cyclase-activating G protein-coupled receptor signaling pathway	0.000115941	0.00228876	0.00161594	4
m8	BP	GO:1905521	regulation of macrophage migration	0.000121162	0.00234834	0.001658	3
m8	BP	GO:0070588	calcium ion transmembrane transport	0.000125338	0.0023859	0.00168452	6
m8	BP	GO:0001662	behavioral fear response	0.000131605	0.00246124	0.00173772	3
m8	BP	GO:0050920	regulation of chemotaxis	0.000136371	0.0025064	0.0017696	5
m8	BP	GO:0002209	behavioral defense response	0.000142617	0.00257677	0.00181929	3
m8	BP	GO:0032147	activation of protein kinase activity	0.000150497	0.00267382	0.00188781	6
m8	BP	GO:0042596	fear response	0.000154211	0.0026949	0.00190269	3
m8	BP	GO:0007626	locomotory behavior	0.000166035	0.00281562	0.00198792	5
m8	BP	GO:0031279	regulation of cyclase activity	0.000166402	0.00281562	0.00198792	3
m8	BP	GO:0032103	positive regulation of response to external stimulus	0.000185808	0.00309487	0.00218508	6
m8	BP	GO:0070838	divalent metal ion transport	0.000192271	0.00311116	0.00219658	7
m8	BP	GO:0010863	positive regulation of phospholipase C activity	0.000192623	0.00311116	0.00219658	3
m8	BP	GO:1903531	negative regulation of secretion by cell	0.000200404	0.00318054	0.00224556	5
m8	BP	GO:0072511	divalent inorganic cation transport	0.000202886	0.00318054	0.00224556	7
m8	BP	GO:0043405	regulation of MAP kinase activity	0.000209251	0.00318659	0.00224984	6
m8	BP	GO:0071902	positive regulation of protein serine/threonine kinase activity	0.000209251	0.00318659	0.00224984	6
m8	BP	GO:1900274	regulation of phospholipase C activity	0.000221388	0.00332393	0.00234681	3
m8	BP	GO:0048512	circadian behavior	0.000269527	0.0039905	0.00281742	3
m8	BP	GO:0007622	rhythmic behavior	0.000286956	0.00419034	0.00295852	3
m8	BP	GO:0006936	muscle contraction	0.000293885	0.00423353	0.00298902	6
m8	BP	GO:0003376	sphingosine-1-phosphate receptor signaling pathway	0.000312097	0.00443593	0.00313192	2
m8	BP	GO:1905517	macrophage migration	0.000323961	0.00454398	0.0032082	3
m8	BP	GO:0035296	regulation of tube diameter	0.000346747	0.00473026	0.00333972	4
m8	BP	GO:0097746	regulation of blood vessel diameter	0.000346747	0.00473026	0.00333972	4
m8	BP	GO:0015850	organic hydroxy compound transport	0.000350554	0.00473026	0.00333972	5
m8	BP	GO:0050921	positive regulation of chemotaxis	0.000402449	0.00536263	0.0037862	4
m8	BP	GO:0050880	regulation of blood vessel size	0.000438787	0.00577465	0.0040771	4
m8	BP	GO:0035150	regulation of tube size	0.000451404	0.00578911	0.00408731	4
m8	BP	GO:0051873	killing by host of symbiont cells	0.000456178	0.00578911	0.00408731	2
m8	BP	GO:0090520	sphingolipid mediated signaling pathway	0.000456178	0.00578911	0.00408731	2
m8	BP	GO:0010518	positive regulation of phospholipase activity	0.00047731	0.00598603	0.00422634	3
m8	BP	GO:0006940	regulation of smooth muscle contraction	0.000555086	0.00688049	0.00485785	3
m8	BP	GO:0045834	positive regulation of lipid metabolic process	0.000592202	0.00725617	0.0051231	4
m8	BP	GO:0051852	disruption by host of symbiont cells	0.000626824	0.00759312	0.005361	2
m8	BP	GO:0000187	activation of MAPK activity	0.000639905	0.00766447	0.00541137	4
m8	BP	GO:0008277	regulation of G protein-coupled receptor signaling pathway	0.000656394	0.00777462	0.00548914	4
m8	BP	GO:0043270	positive regulation of ion transport	0.000706801	0.00827967	0.00584572	5
m8	BP	GO:0051883	killing of cells in other organism involved in symbiotic interaction	0.000722023	0.00831455	0.00587035	2
m8	BP	GO:0030168	platelet activation	0.000725378	0.00831455	0.00587035	4
m8	BP	GO:0010517	regulation of phospholipase activity	0.000733966	0.00832348	0.00587666	3
m8	BP	GO:0050795	regulation of behavior	0.000835655	0.00937693	0.00662042	3
m8	BP	GO:0060193	positive regulation of lipase activity	0.000871436	0.00967657	0.00683198	3
m8	BP	GO:0003018	vascular process in circulatory system	0.000899131	0.00987874	0.00697472	4
m8	BP	GO:0033555	multicellular organismal response to stress	0.000908177	0.00987874	0.00697472	3
m8	BP	GO:0007194	negative regulation of adenylate cyclase activity	0.000932	0.00993512	0.00701452	2
m8	BP	GO:0051818	disruption of cells of other organism involved in symbiotic interaction	0.000932	0.00993512	0.00701452	2
m8	BP	GO:0072347	response to anesthetic	0.000945887	0.00998333	0.00704856	3
m8	MF	GO:0001664	G protein-coupled receptor binding	2.50773e-12	2.68327e-10	1.71582e-10	11
m8	MF	GO:0042379	chemokine receptor binding	1.82992e-09	9.79008e-08	6.26026e-08	6
m8	MF	GO:0008009	chemokine activity	1.11725e-08	3.98484e-07	2.5481e-07	5
m8	MF	GO:0045125	bioactive lipid receptor activity	2.51306e-08	6.72242e-07	4.29865e-07	4
m8	MF	GO:0048018	receptor ligand activity	5.34979e-07	1.07206e-05	6.85527e-06	9
m8	MF	GO:0008227	G protein-coupled amine receptor activity	6.01154e-07	1.07206e-05	6.85527e-06	4
m8	MF	GO:0030545	receptor regulator activity	9.44259e-07	1.44337e-05	9.2296e-06	9
m8	MF	GO:0008528	G protein-coupled peptide receptor activity	6.58069e-06	8.1957e-05	5.24073e-05	5
m8	MF	GO:0001653	peptide receptor activity	6.89358e-06	8.1957e-05	5.24073e-05	5
m8	MF	GO:0005126	cytokine receptor binding	1.39174e-05	0.000148917	9.52246e-05	6
m8	MF	GO:0001965	G-protein alpha-subunit binding	1.6767e-05	0.000163097	0.000104292	3
m8	MF	GO:0099528	G protein-coupled neurotransmitter receptor activity	2.25702e-05	0.000201251	0.00012869	3
m8	MF	GO:0008066	glutamate receptor activity	3.78372e-05	0.000289184	0.000184919	3
m8	MF	GO:0048020	CCR chemokine receptor binding	3.78372e-05	0.000289184	0.000184919	3
m8	MF	GO:0005125	cytokine activity	4.20413e-05	0.000299895	0.000191767	5
m8	MF	GO:0008188	neuropeptide receptor activity	0.000120193	0.000803787	0.000513981	3
m8	MF	GO:0004993	G protein-coupled serotonin receptor activity	0.000278641	0.00165637	0.00105916	2
m8	MF	GO:0099589	serotonin receptor activity	0.000278641	0.00165637	0.00105916	2
m8	MF	GO:0004953	icosanoid receptor activity	0.000407359	0.00217937	0.0013936	2
m8	MF	GO:1901338	catecholamine binding	0.000407359	0.00217937	0.0013936	2
m8	MF	GO:0016502	nucleotide receptor activity	0.000735901	0.00374959	0.00239767	2
m8	MF	GO:0030594	neurotransmitter receptor activity	0.00133983	0.00651646	0.00416694	3
m9	BP	GO:0034660	ncRNA metabolic process	3.8725e-47	2.57521e-44	2.34388e-44	47
m9	BP	GO:0034470	ncRNA processing	6.59864e-42	2.19405e-39	1.99696e-39	38
m9	BP	GO:0042254	ribosome biogenesis	1.96536e-31	4.35654e-29	3.9652e-29	28
m9	BP	GO:0022613	ribonucleoprotein complex biogenesis	1.49345e-27	2.48285e-25	2.25982e-25	31
m9	BP	GO:0006399	tRNA metabolic process	1.22781e-24	1.63298e-22	1.48629e-22	22
m9	BP	GO:0016072	rRNA metabolic process	2.26943e-24	2.51528e-22	2.28933e-22	23
m9	BP	GO:0006364	rRNA processing	1.84747e-23	1.7551e-21	1.59744e-21	21
m9	BP	GO:0008033	tRNA processing	1.8839e-20	1.56599e-18	1.42532e-18	17
m9	BP	GO:0009451	RNA modification	6.88171e-18	5.08482e-16	4.62805e-16	16
m9	BP	GO:0006400	tRNA modification	8.2525e-16	5.48791e-14	4.99494e-14	12
m9	BP	GO:0140053	mitochondrial gene expression	7.88096e-10	4.7644e-08	4.33641e-08	11
m9	BP	GO:0032543	mitochondrial translation	2.35738e-09	1.30638e-07	1.18903e-07	10
m9	BP	GO:0006415	translational termination	5.44617e-09	2.78593e-07	2.53567e-07	9
m9	BP	GO:0001522	pseudouridine synthesis	1.04225e-08	4.95067e-07	4.50596e-07	5
m9	BP	GO:0070125	mitochondrial translational elongation	3.07794e-08	1.36455e-06	1.24198e-06	8
m9	BP	GO:0006414	translational elongation	3.63031e-08	1.44497e-06	1.31517e-06	9
m9	BP	GO:0070126	mitochondrial translational termination	3.69391e-08	1.44497e-06	1.31517e-06	8
m9	BP	GO:0090501	RNA phosphodiester bond hydrolysis	6.25216e-08	2.30982e-06	2.10233e-06	9
m9	BP	GO:0006418	tRNA aminoacylation for protein translation	1.30548e-07	4.56919e-06	4.15874e-06	6
m9	BP	GO:0043039	tRNA aminoacylation	1.99924e-07	6.64747e-06	6.05033e-06	6
m9	BP	GO:0030488	tRNA methylation	2.115e-07	6.69751e-06	6.09587e-06	5
m9	BP	GO:0043038	amino acid activation	2.28858e-07	6.91776e-06	6.29633e-06	6
m9	BP	GO:0090305	nucleic acid phosphodiester bond hydrolysis	3.66469e-07	1.05957e-05	9.64393e-06	11
m9	BP	GO:0001510	RNA methylation	7.57665e-07	2.09936e-05	1.91078e-05	6
m9	BP	GO:0043624	cellular protein complex disassembly	1.70872e-06	4.5452e-05	4.13691e-05	9
m9	BP	GO:0045943	positive regulation of transcription by RNA polymerase I	6.69864e-06	0.000171331	0.00015594	4
m9	BP	GO:0006401	RNA catabolic process	7.94166e-06	0.0001956	0.000178029	11
m9	BP	GO:0042273	ribosomal large subunit biogenesis	1.57235e-05	0.000373433	0.000339888	4
m9	BP	GO:0000956	nuclear-transcribed mRNA catabolic process	1.6829e-05	0.000385907	0.000351241	8
m9	BP	GO:0032259	methylation	2.18079e-05	0.000483409	0.000439984	10
m9	BP	GO:0006360	transcription by RNA polymerase I	2.71287e-05	0.000581955	0.000529678	5
m9	BP	GO:0043414	macromolecule methylation	2.81773e-05	0.00058556	0.000532959	9
m9	BP	GO:0006356	regulation of transcription by RNA polymerase I	3.15209e-05	0.000635193	0.000578134	4
m9	BP	GO:0090503	RNA phosphodiester bond hydrolysis, exonucleolytic	3.57122e-05	0.000698488	0.000635743	4
m9	BP	GO:2000232	regulation of rRNA processing	3.79918e-05	0.000721843	0.000657	3
m9	BP	GO:0090502	RNA phosphodiester bond hydrolysis, endonucleolytic	4.89458e-05	0.000884	0.00080459	5
m9	BP	GO:0090069	regulation of ribosome biogenesis	4.9185e-05	0.000884	0.00080459	3
m9	BP	GO:0032984	protein-containing complex disassembly	5.11914e-05	0.00089585	0.000815376	9
m9	BP	GO:0006402	mRNA catabolic process	0.000133819	0.00228178	0.00207681	9
m9	BP	GO:0000966	RNA 5'-end processing	0.00019045	0.00316623	0.0028818	3
m9	BP	GO:0042255	ribosome assembly	0.000423715	0.00687244	0.00625509	3
m9	BP	GO:0022411	cellular component disassembly	0.000496339	0.00785871	0.00715276	10
m9	BP	GO:0002181	cytoplasmic translation	0.00064492	0.00997376	0.00907782	4
m9	CC	GO:0005840	ribosome	1.61904e-10	1.50571e-08	1.00551e-08	14
m9	CC	GO:0000313	organellar ribosome	1.11776e-09	3.46506e-08	2.31396e-08	9
m9	CC	GO:0005761	mitochondrial ribosome	1.11776e-09	3.46506e-08	2.31396e-08	9
m9	CC	GO:0044391	ribosomal subunit	4.06299e-09	9.44645e-08	6.30833e-08	11
m9	CC	GO:0098798	mitochondrial protein complex	8.41816e-07	1.56578e-05	1.04562e-05	10
m9	CC	GO:0044452	nucleolar part	2.33965e-06	3.62646e-05	2.42175e-05	8
m9	CC	GO:0005759	mitochondrial matrix	8.97552e-06	0.000119246	7.96324e-05	12
m9	CC	GO:0000314	organellar small ribosomal subunit	1.55519e-05	0.000160703	0.000107317	4
m9	CC	GO:0005763	mitochondrial small ribosomal subunit	1.55519e-05	0.000160703	0.000107317	4
m9	CC	GO:0015934	large ribosomal subunit	3.46912e-05	0.000322628	0.000215451	6
m9	CC	GO:0015935	small ribosomal subunit	3.90929e-05	0.000330512	0.000220716	5
m9	CC	GO:0030684	preribosome	6.17916e-05	0.000478885	0.000319799	3
m9	CC	GO:0000315	organellar large ribosomal subunit	0.00026752	0.0017771	0.00118674	4
m9	CC	GO:0005762	mitochondrial large ribosomal subunit	0.00026752	0.0017771	0.00118674	4
m9	CC	GO:0000178	exosome (RNase complex)	0.000329688	0.00191631	0.00127971	3
m9	CC	GO:1905354	exoribonuclease complex	0.000329688	0.00191631	0.00127971	3
m9	CC	GO:0005732	small nucleolar ribonucleoprotein complex	0.000420033	0.00229783	0.00153449	3
m9	CC	GO:0005743	mitochondrial inner membrane	0.000974241	0.00503358	0.00336142	9
m9	CC	GO:0030681	multimeric ribonuclease P complex	0.00139369	0.00648067	0.00432778	2
m9	CC	GO:0072588	box H/ACA RNP complex	0.00139369	0.00648067	0.00432778	2
m9	CC	GO:0019866	organelle inner membrane	0.00186744	0.0082701	0.00552276	9
m9	MF	GO:0140098	catalytic activity, acting on RNA	5.32015e-17	6.7566e-15	3.97612e-15	21
m9	MF	GO:0140101	catalytic activity, acting on a tRNA	3.07669e-15	1.9537e-13	1.14971e-13	14
m9	MF	GO:0000049	tRNA binding	7.09826e-10	3.00493e-08	1.76834e-08	8
m9	MF	GO:0004812	aminoacyl-tRNA ligase activity	1.00322e-07	2.54817e-06	1.49954e-06	6
m9	MF	GO:0016875	ligase activity, forming carbon-oxygen bonds	1.00322e-07	2.54817e-06	1.49954e-06	6
m9	MF	GO:0009982	pseudouridine synthase activity	3.66276e-07	7.75285e-06	4.56239e-06	4
m9	MF	GO:0008175	tRNA methyltransferase activity	4.40293e-07	7.98817e-06	4.70087e-06	5
m9	MF	GO:0030515	snoRNA binding	8.03059e-06	0.000127486	7.50226e-05	4
m9	MF	GO:0016866	intramolecular transferase activity	9.86976e-06	0.000139273	8.19594e-05	4
m9	MF	GO:0008173	RNA methyltransferase activity	1.56364e-05	0.000198582	0.000116861	5
m9	MF	GO:0032549	ribonucleoside binding	5.38672e-05	0.000621921	0.000365987	10
m9	MF	GO:0001882	nucleoside binding	6.4472e-05	0.000682328	0.000401536	10
m9	MF	GO:0003724	RNA helicase activity	7.15847e-05	0.000699327	0.00041154	4
m9	MF	GO:0004527	exonuclease activity	7.98324e-05	0.000724194	0.000426173	5
m9	MF	GO:0004518	nuclease activity	0.000139109	0.00117779	0.000693106	7
m9	MF	GO:0016853	isomerase activity	0.000156925	0.00124559	0.000733006	6
m9	MF	GO:0004386	helicase activity	0.000203936	0.00152352	0.000896559	6
m9	MF	GO:0005525	GTP binding	0.000229471	0.0015636	0.000920147	9
m9	MF	GO:0032550	purine ribonucleoside binding	0.000257997	0.0015636	0.000920147	9
m9	MF	GO:0016874	ligase activity	0.000261417	0.0015636	0.000920147	6
m9	MF	GO:0008168	methyltransferase activity	0.000274486	0.0015636	0.000920147	7
m9	MF	GO:0001883	purine nucleoside binding	0.000276483	0.0015636	0.000920147	9
m9	MF	GO:0008757	S-adenosylmethionine-dependent methyltransferase activity	0.000283172	0.0015636	0.000920147	6
m9	MF	GO:0019001	guanyl nucleotide binding	0.000346227	0.00175883	0.00103504	9
m9	MF	GO:0032561	guanyl ribonucleotide binding	0.000346227	0.00175883	0.00103504	9
m9	MF	GO:0016741	transferase activity, transferring one-carbon groups	0.00037385	0.00182612	0.00107463	7
m9	MF	GO:0004540	ribonuclease activity	0.000394016	0.00185334	0.00109065	5
m9	MF	GO:0016887	ATPase activity	0.000537572	0.00243828	0.00143487	8
m9	MF	GO:0004004	ATP-dependent RNA helicase activity	0.000579103	0.00253607	0.00149242	3
m9	MF	GO:0008186	RNA-dependent ATPase activity	0.000813054	0.00344193	0.0020255	3
m9	MF	GO:0000175	3'-5'-exoribonuclease activity	0.000902529	0.00369746	0.00217588	3
m9	MF	GO:0008135	translation factor activity, RNA binding	0.00100099	0.00397267	0.00233783	4
m9	MF	GO:0016896	exoribonuclease activity, producing 5'-phosphomonoesters	0.00109966	0.00423202	0.00249046	3
m9	MF	GO:0004532	exoribonuclease activity	0.00132203	0.00493817	0.00290601	3
m9	MF	GO:0033204	ribonuclease P RNA binding	0.00187691	0.00681051	0.00400784	2
m9	MF	GO:0004526	ribonuclease P activity	0.00272916	0.00962787	0.0056658	2
m10	BP	GO:0072376	protein activation cascade	6.64121e-10	6.86702e-07	4.87954e-07	8
m10	BP	GO:0006959	humoral immune response	3.66454e-09	1.89457e-06	1.34624e-06	9
m10	BP	GO:0006956	complement activation	6.94614e-09	2.3941e-06	1.7012e-06	7
m10	BP	GO:0002526	acute inflammatory response	1.29533e-08	3.34844e-06	2.37933e-06	8
m10	BP	GO:0051604	protein maturation	3.09582e-08	6.40216e-06	4.54923e-06	9
m10	BP	GO:0070613	regulation of protein processing	5.59652e-08	8.94586e-06	6.35673e-06	7
m10	BP	GO:1903317	regulation of protein maturation	6.05619e-08	8.94586e-06	6.35673e-06	7
m10	BP	GO:0016485	protein processing	1.25492e-07	1.62198e-05	1.15255e-05	8
m10	BP	GO:0001867	complement activation, lectin pathway	1.32335e-06	0.000136834	9.72314e-05	3
m10	BP	GO:0010755	regulation of plasminogen activation	1.32335e-06	0.000136834	9.72314e-05	3
m10	BP	GO:0008228	opsonization	1.76195e-06	0.000156585	0.000111266	3
m10	BP	GO:0051346	negative regulation of hydrolase activity	1.81723e-06	0.000156585	0.000111266	8
m10	BP	GO:0045861	negative regulation of proteolysis	3.83411e-06	0.00030496	0.000216697	7
m10	BP	GO:0007596	blood coagulation	4.4132e-06	0.00032093	0.000228046	7
m10	BP	GO:0007599	hemostasis	4.87008e-06	0.00032093	0.000228046	7
m10	BP	GO:0050817	coagulation	4.96603e-06	0.00032093	0.000228046	7
m10	BP	GO:0031639	plasminogen activation	1.21593e-05	0.000739573	0.000525523	3
m10	BP	GO:0002673	regulation of acute inflammatory response	1.84772e-05	0.00106141	0.000754216	5
m10	BP	GO:0003081	regulation of systemic arterial blood pressure by renin-angiotensin	2.2931e-05	0.00124793	0.000886752	3
m10	BP	GO:0008202	steroid metabolic process	4.59917e-05	0.00236587	0.00168114	6
m10	BP	GO:0050727	regulation of inflammatory response	4.80496e-05	0.00236587	0.00168114	7
m10	BP	GO:0001990	regulation of systemic arterial blood pressure by hormone	6.00537e-05	0.00257338	0.00182858	3
m10	BP	GO:0010955	negative regulation of protein processing	6.00537e-05	0.00257338	0.00182858	3
m10	BP	GO:1903318	negative regulation of protein maturation	6.00537e-05	0.00257338	0.00182858	3
m10	BP	GO:0050878	regulation of body fluid levels	6.2219e-05	0.00257338	0.00182858	7
m10	BP	GO:0043277	apoptotic cell clearance	6.51085e-05	0.00258932	0.00183991	3
m10	BP	GO:0030449	regulation of complement activation	9.34889e-05	0.00344628	0.00244885	4
m10	BP	GO:0003044	regulation of systemic arterial blood pressure mediated by a chemical signal	9.45722e-05	0.00344628	0.00244885	3
m10	BP	GO:2000257	regulation of protein activation cascade	9.66558e-05	0.00344628	0.00244885	4
m10	BP	GO:0031638	zymogen activation	0.000115833	0.00399238	0.00283689	3
m10	BP	GO:0006953	acute-phase response	0.000123555	0.00412116	0.0029284	3
m10	BP	GO:0002576	platelet degranulation	0.000136849	0.00438631	0.00311681	4
m10	BP	GO:0030195	negative regulation of blood coagulation	0.000139989	0.00438631	0.00311681	3
m10	BP	GO:1900047	negative regulation of hemostasis	0.000148713	0.00452261	0.00321366	3
m10	BP	GO:0002920	regulation of humoral immune response	0.000168011	0.00496352	0.00352696	4
m10	BP	GO:0050819	negative regulation of coagulation	0.000176986	0.00508342	0.00361216	3
m10	BP	GO:0055091	phospholipid homeostasis	0.000225664	0.00630639	0.00448117	2
m10	BP	GO:0010872	regulation of cholesterol esterification	0.000270444	0.00735893	0.00522908	2
m10	BP	GO:0006883	cellular sodium ion homeostasis	0.0003192	0.00825132	0.0058632	2
m10	BP	GO:0051917	regulation of fibrinolysis	0.0003192	0.00825132	0.0058632	2
m10	BP	GO:0006910	phagocytosis, recognition	0.000371915	0.00937952	0.00666488	2
m10	BP	GO:0006909	phagocytosis	0.000403807	0.00994135	0.00706409	5
m10	CC	GO:0072562	blood microparticle	3.4994e-13	2.97449e-11	1.98913e-11	10
m10	CC	GO:0062023	collagen-containing extracellular matrix	3.61074e-10	1.53457e-08	1.02621e-08	11
m10	CC	GO:0031012	extracellular matrix	1.93484e-09	5.48206e-08	3.66602e-08	11
m10	CC	GO:0031091	platelet alpha granule	1.24101e-06	2.63715e-05	1.76354e-05	5
m10	CC	GO:0031093	platelet alpha granule lumen	0.000367591	0.00624904	0.00417892	3
m10	CC	GO:0034774	secretory granule lumen	0.00051802	0.00704704	0.00471257	5
m10	CC	GO:0060205	cytoplasmic vesicle lumen	0.000654461	0.00704704	0.00471257	5
m10	CC	GO:0031983	vesicle lumen	0.000663251	0.00704704	0.00471257	5
m10	CC	GO:0005581	collagen trimer	0.00076408	0.00721631	0.00482577	3
m10	MF	GO:0004866	endopeptidase inhibitor activity	5.711e-13	3.80644e-11	2.51272e-11	10
m10	MF	GO:0061135	endopeptidase regulator activity	7.96781e-13	3.80644e-11	2.51272e-11	10
m10	MF	GO:0030414	peptidase inhibitor activity	9.67738e-13	3.80644e-11	2.51272e-11	10
m10	MF	GO:0004857	enzyme inhibitor activity	3.08461e-12	9.09959e-11	6.00687e-11	12
m10	MF	GO:0061134	peptidase regulator activity	7.26383e-12	1.71426e-10	1.13163e-10	10
m10	MF	GO:0004867	serine-type endopeptidase inhibitor activity	1.88626e-10	3.70964e-09	2.44883e-09	7
m10	MF	GO:0008236	serine-type peptidase activity	1.45163e-09	2.44704e-08	1.61535e-08	8
m10	MF	GO:0017171	serine hydrolase activity	1.85874e-09	2.74164e-08	1.80983e-08	8
m10	MF	GO:0004252	serine-type endopeptidase activity	1.31201e-08	1.72019e-07	1.13554e-07	7
m10	MF	GO:0004175	endopeptidase activity	5.23953e-06	6.18265e-05	4.08132e-05	7
m10	MF	GO:0002020	protease binding	6.16118e-06	6.60927e-05	4.36294e-05	5
m10	MF	GO:0008201	heparin binding	1.64168e-05	0.000161432	0.000106565	5
m10	MF	GO:0005539	glycosaminoglycan binding	6.77695e-05	0.000615138	0.000406068	5
m10	MF	GO:1901681	sulfur compound binding	0.000111146	0.0009368	0.000618405	5
m10	MF	GO:0055102	lipase inhibitor activity	0.000477137	0.00375348	0.00247776	2
m10	MF	GO:0001848	complement binding	0.000857482	0.00632393	0.00417458	2
m11	BP	GO:0042775	mitochondrial ATP synthesis coupled electron transport	5.52621e-27	7.63843e-25	6.06016e-25	17
m11	BP	GO:0045333	cellular respiration	5.59954e-27	7.63843e-25	6.06016e-25	20
m11	BP	GO:0042773	ATP synthesis coupled electron transport	6.79979e-27	7.63843e-25	6.06016e-25	17
m11	BP	GO:0022904	respiratory electron transport chain	1.37671e-25	1.15988e-23	9.20223e-24	17
m11	BP	GO:0022900	electron transport chain	3.22859e-25	2.17607e-23	1.72645e-23	19
m11	BP	GO:0006119	oxidative phosphorylation	6.28704e-24	3.53122e-22	2.80159e-22	17
m11	BP	GO:0015980	energy derivation by oxidation of organic compounds	2.32646e-23	1.12002e-21	8.88603e-22	20
m11	BP	GO:0033108	mitochondrial respiratory chain complex assembly	3.0978e-19	1.30495e-17	1.03532e-17	13
m11	BP	GO:0046034	ATP metabolic process	5.20522e-18	1.94907e-16	1.54635e-16	17
m11	BP	GO:0006120	mitochondrial electron transport, NADH to ubiquinone	6.83008e-18	2.30174e-16	1.82615e-16	11
m11	BP	GO:0009205	purine ribonucleoside triphosphate metabolic process	2.37355e-17	7.27169e-16	5.7692e-16	17
m11	BP	GO:0009167	purine ribonucleoside monophosphate metabolic process	2.78525e-17	7.45227e-16	5.91247e-16	17
m11	BP	GO:0009126	purine nucleoside monophosphate metabolic process	2.93673e-17	7.45227e-16	5.91247e-16	17
m11	BP	GO:0009199	ribonucleoside triphosphate metabolic process	3.0959e-17	7.45227e-16	5.91247e-16	17
m11	BP	GO:0009144	purine nucleoside triphosphate metabolic process	3.43877e-17	7.72578e-16	6.12946e-16	17
m11	BP	GO:0010257	NADH dehydrogenase complex assembly	4.16109e-17	8.24874e-16	6.54437e-16	11
m11	BP	GO:0032981	mitochondrial respiratory chain complex I assembly	4.16109e-17	8.24874e-16	6.54437e-16	11
m11	BP	GO:0009161	ribonucleoside monophosphate metabolic process	5.75487e-17	1.07744e-15	8.54817e-16	17
m11	BP	GO:0009141	nucleoside triphosphate metabolic process	7.7765e-17	1.3793e-15	1.09431e-15	17
m11	BP	GO:0009123	nucleoside monophosphate metabolic process	1.39634e-16	2.35284e-15	1.86669e-15	17
m11	BP	GO:0070125	mitochondrial translational elongation	1.30405e-15	2.09269e-14	1.6603e-14	11
m11	BP	GO:0070126	mitochondrial translational termination	1.69853e-15	2.60184e-14	2.06424e-14	11
m11	BP	GO:0006414	translational elongation	1.88627e-15	2.7638e-14	2.19274e-14	12
m11	BP	GO:0032543	mitochondrial translation	2.08204e-15	2.92354e-14	2.31947e-14	12
m11	BP	GO:0009150	purine ribonucleotide metabolic process	2.99321e-15	4.03484e-14	3.20116e-14	18
m11	BP	GO:0006415	translational termination	7.31939e-15	9.48705e-14	7.52682e-14	11
m11	BP	GO:0140053	mitochondrial gene expression	1.6396e-14	2.04647e-13	1.62362e-13	12
m11	BP	GO:0007005	mitochondrion organization	4.61943e-12	5.55982e-11	4.41104e-11	15
m11	BP	GO:0043624	cellular protein complex disassembly	1.22013e-11	1.41787e-10	1.12491e-10	11
m11	BP	GO:0032984	protein-containing complex disassembly	1.13924e-09	1.27975e-08	1.01532e-08	11
m11	BP	GO:0009060	aerobic respiration	1.27223e-09	1.38304e-08	1.09727e-08	7
m11	BP	GO:0022411	cellular component disassembly	1.97623e-07	2.08122e-06	1.65119e-06	11
m11	BP	GO:0006123	mitochondrial electron transport, cytochrome c to oxygen	2.18698e-07	2.16769e-06	1.7198e-06	4
m11	BP	GO:0019646	aerobic electron transport chain	2.18698e-07	2.16769e-06	1.7198e-06	4
m11	BP	GO:1902600	proton transmembrane transport	2.91686e-07	2.80852e-06	2.22822e-06	7
m11	BP	GO:0006878	cellular copper ion homeostasis	3.06143e-06	2.86584e-05	2.27369e-05	3
m11	BP	GO:0055070	copper ion homeostasis	7.2498e-06	6.60319e-05	5.23883e-05	3
m11	BP	GO:0006099	tricarboxylic acid cycle	7.19628e-05	0.000638196	0.000506331	3
m11	BP	GO:0015672	monovalent inorganic cation transport	8.4584e-05	0.000730892	0.000579874	8
m11	BP	GO:0006101	citrate metabolic process	8.95154e-05	0.000754168	0.00059834	3
m11	BP	GO:0072350	tricarboxylic acid metabolic process	0.000132526	0.0010893	0.000864224	3
m11	BP	GO:0006122	mitochondrial electron transport, ubiquinol to cytochrome c	0.000577424	0.00463314	0.00367583	2
m11	BP	GO:0006825	copper ion transport	0.000793073	0.00621548	0.00493122	2
m11	BP	GO:0033617	mitochondrial respiratory chain complex IV assembly	0.000913317	0.00699518	0.00554982	2
m11	CC	GO:0019866	organelle inner membrane	7.96861e-54	7.96861e-52	4.6134e-52	41
m11	CC	GO:0005743	mitochondrial inner membrane	1.78003e-53	8.90016e-52	5.15272e-52	40
m11	CC	GO:0098798	mitochondrial protein complex	2.35821e-37	7.86071e-36	4.55094e-36	27
m11	CC	GO:0044455	mitochondrial membrane part	7.90624e-28	1.97656e-26	1.14432e-26	21
m11	CC	GO:0005746	mitochondrial respiratory chain	5.43802e-26	1.0876e-24	6.29665e-25	16
m11	CC	GO:0070469	respiratory chain	3.58616e-25	5.97693e-24	3.46033e-24	16
m11	CC	GO:0098803	respiratory chain complex	1.04448e-22	1.49211e-21	8.63854e-22	14
m11	CC	GO:0098800	inner mitochondrial membrane protein complex	2.60989e-21	3.26237e-20	1.88874e-20	15
m11	CC	GO:1990204	oxidoreductase complex	7.64567e-21	8.49519e-20	4.91827e-20	14
m11	CC	GO:0005759	mitochondrial matrix	6.08164e-19	6.08164e-18	3.52095e-18	20
m11	CC	GO:0005747	mitochondrial respiratory chain complex I	1.70373e-18	1.31056e-17	7.58746e-18	11
m11	CC	GO:0030964	NADH dehydrogenase complex	1.70373e-18	1.31056e-17	7.58746e-18	11
m11	CC	GO:0045271	respiratory chain complex I	1.70373e-18	1.31056e-17	7.58746e-18	11
m11	CC	GO:0000313	organellar ribosome	7.87003e-16	5.24668e-15	3.03755e-15	11
m11	CC	GO:0005761	mitochondrial ribosome	7.87003e-16	5.24668e-15	3.03755e-15	11
m11	CC	GO:0044391	ribosomal subunit	2.62741e-12	1.64213e-11	9.50707e-12	11
m11	CC	GO:0005840	ribosome	1.53649e-10	9.03816e-10	5.23262e-10	11
m11	CC	GO:0000315	organellar large ribosomal subunit	1.27722e-08	6.7222e-08	3.8918e-08	6
m11	CC	GO:0005762	mitochondrial large ribosomal subunit	1.27722e-08	6.7222e-08	3.8918e-08	6
m11	CC	GO:0000314	organellar small ribosomal subunit	1.41215e-08	6.72454e-08	3.89316e-08	5
m11	CC	GO:0005763	mitochondrial small ribosomal subunit	1.41215e-08	6.72454e-08	3.89316e-08	5
m11	CC	GO:0015934	large ribosomal subunit	7.48228e-07	3.40104e-06	1.96902e-06	6
m11	CC	GO:0015935	small ribosomal subunit	1.54505e-06	6.71761e-06	3.88914e-06	5
m11	CC	GO:0031304	intrinsic component of mitochondrial inner membrane	0.000174869	0.000699476	0.00040496	3
m11	CC	GO:0031305	integral component of mitochondrial inner membrane	0.000174869	0.000699476	0.00040496	3
m11	CC	GO:0032592	integral component of mitochondrial membrane	0.000846653	0.00325636	0.00188526	3
m11	CC	GO:0098573	intrinsic component of mitochondrial membrane	0.000886448	0.00328314	0.00190077	3
m11	CC	GO:0005758	mitochondrial intermembrane space	0.00129878	0.00463851	0.00268545	3
m11	CC	GO:0031970	organelle envelope lumen	0.0018151	0.00625897	0.00362362	3
m11	MF	GO:0003954	NADH dehydrogenase activity	6.93677e-17	1.52609e-15	9.24903e-16	10
m11	MF	GO:0008137	NADH dehydrogenase (ubiquinone) activity	6.93677e-17	1.52609e-15	9.24903e-16	10
m11	MF	GO:0050136	NADH dehydrogenase (quinone) activity	6.93677e-17	1.52609e-15	9.24903e-16	10
m11	MF	GO:0016655	oxidoreductase activity, acting on NAD(P)H, quinone or similar compound as acceptor	9.14473e-16	1.50888e-14	9.14473e-15	10
m11	MF	GO:0016651	oxidoreductase activity, acting on NAD(P)H	2.19185e-13	2.89324e-12	1.75348e-12	10
m11	MF	GO:0009055	electron transfer activity	4.42178e-10	4.86396e-09	2.94785e-09	8
m11	MF	GO:0051537	2 iron, 2 sulfur cluster binding	2.02165e-05	0.000139786	8.4719e-05	3
m11	MF	GO:0004129	cytochrome-c oxidase activity	2.39562e-05	0.000139786	8.4719e-05	3
m11	MF	GO:0015002	heme-copper terminal oxidase activity	2.39562e-05	0.000139786	8.4719e-05	3
m11	MF	GO:0016676	oxidoreductase activity, acting on a heme group of donors, oxygen as acceptor	2.39562e-05	0.000139786	8.4719e-05	3
m11	MF	GO:0051536	iron-sulfur cluster binding	2.54157e-05	0.000139786	8.4719e-05	4
m11	MF	GO:0051540	metal cluster binding	2.54157e-05	0.000139786	8.4719e-05	4
m11	MF	GO:0016675	oxidoreductase activity, acting on a heme group of donors	2.81241e-05	0.000142784	8.65357e-05	3
m11	MF	GO:0015078	proton transmembrane transporter activity	5.73219e-05	0.000270232	0.000163777	4
m11	MF	GO:0048037	cofactor binding	0.000315781	0.00138944	0.000842084	7
m11	MF	GO:0048038	quinone binding	0.000787521	0.00324852	0.0019688	2
m11	MF	GO:0003735	structural constituent of ribosome	0.00125679	0.00487931	0.00295716	4
m13	BP	GO:0042775	mitochondrial ATP synthesis coupled electron transport	7.90698e-27	1.3348e-24	1.04116e-24	16
m13	BP	GO:0042773	ATP synthesis coupled electron transport	9.60289e-27	1.3348e-24	1.04116e-24	16
m13	BP	GO:0022900	electron transport chain	1.32387e-25	1.12058e-23	8.74065e-24	18
m13	BP	GO:0022904	respiratory electron transport chain	1.61235e-25	1.12058e-23	8.74065e-24	16
m13	BP	GO:0006119	oxidative phosphorylation	5.84019e-24	3.24714e-22	2.5328e-22	16
m13	BP	GO:0045333	cellular respiration	7.93682e-22	3.67739e-20	2.86839e-20	16
m13	BP	GO:0015980	energy derivation by oxidation of organic compounds	5.83564e-19	2.31758e-17	1.80773e-17	16
m13	BP	GO:0046034	ATP metabolic process	2.23155e-18	7.75463e-17	6.04867e-17	16
m13	BP	GO:0009205	purine ribonucleoside triphosphate metabolic process	9.38975e-18	2.79804e-16	2.18249e-16	16
m13	BP	GO:0009167	purine ribonucleoside monophosphate metabolic process	1.09263e-17	2.79804e-16	2.18249e-16	16
m13	BP	GO:0009126	purine nucleoside monophosphate metabolic process	1.14886e-17	2.79804e-16	2.18249e-16	16
m13	BP	GO:0009199	ribonucleoside triphosphate metabolic process	1.20779e-17	2.79804e-16	2.18249e-16	16
m13	BP	GO:0009144	purine nucleoside triphosphate metabolic process	1.3342e-17	2.85313e-16	2.22546e-16	16
m13	BP	GO:0009161	ribonucleoside monophosphate metabolic process	2.17365e-17	4.31625e-16	3.36671e-16	16
m13	BP	GO:0009141	nucleoside triphosphate metabolic process	2.8917e-17	5.35929e-16	4.18029e-16	16
m13	BP	GO:0009123	nucleoside monophosphate metabolic process	5.03783e-17	8.75323e-16	6.82758e-16	16
m13	BP	GO:0006120	mitochondrial electron transport, NADH to ubiquinone	5.56124e-17	9.09427e-16	7.0936e-16	10
m13	BP	GO:0010257	NADH dehydrogenase complex assembly	2.83684e-16	4.15074e-15	3.23761e-15	10
m13	BP	GO:0032981	mitochondrial respiratory chain complex I assembly	2.83684e-16	4.15074e-15	3.23761e-15	10
m13	BP	GO:0006414	translational elongation	5.30849e-15	7.3788e-14	5.75552e-14	11
m13	BP	GO:0070125	mitochondrial translational elongation	6.39072e-15	8.46009e-14	6.59894e-14	10
m13	BP	GO:0033108	mitochondrial respiratory chain complex assembly	7.20855e-15	9.10898e-14	7.10508e-14	10
m13	BP	GO:0070126	mitochondrial translational termination	8.11905e-15	9.81346e-14	7.65458e-14	10
m13	BP	GO:0009150	purine ribonucleotide metabolic process	1.41838e-14	1.64296e-13	1.28152e-13	16
m13	BP	GO:0006415	translational termination	3.0515e-14	3.39327e-13	2.64677e-13	10
m13	BP	GO:0032543	mitochondrial translation	2.99781e-13	3.20535e-12	2.50019e-12	10
m13	BP	GO:0140053	mitochondrial gene expression	1.65572e-12	1.70477e-11	1.32974e-11	10
m13	BP	GO:0043624	cellular protein complex disassembly	2.60229e-11	2.5837e-10	2.01531e-10	10
m13	BP	GO:0007005	mitochondrion organization	6.15898e-10	5.90413e-09	4.60526e-09	12
m13	BP	GO:0032984	protein-containing complex disassembly	1.64853e-09	1.52764e-08	1.19157e-08	10
m13	BP	GO:0006123	mitochondrial electron transport, cytochrome c to oxygen	8.59321e-08	7.46535e-07	5.82303e-07	4
m13	BP	GO:0019646	aerobic electron transport chain	8.59321e-08	7.46535e-07	5.82303e-07	4
m13	BP	GO:0022411	cellular component disassembly	1.89494e-07	1.59635e-06	1.24516e-06	10
m13	BP	GO:1902600	proton transmembrane transport	1.36153e-06	1.11325e-05	8.68343e-06	6
m13	BP	GO:0009060	aerobic respiration	2.09624e-05	0.000166501	0.000129872	4
m13	BP	GO:0015672	monovalent inorganic cation transport	0.000127604	0.000985388	0.00076861	7
m13	BP	GO:0006122	mitochondrial electron transport, ubiquinol to cytochrome c	0.000365865	0.00274893	0.00214419	2
m13	CC	GO:0005743	mitochondrial inner membrane	2.026e-41	1.78288e-39	1.00234e-39	31
m13	CC	GO:0019866	organelle inner membrane	4.04178e-40	1.77839e-38	9.9981e-39	31
m13	CC	GO:0098798	mitochondrial protein complex	3.94713e-31	1.15783e-29	6.50931e-30	22
m13	CC	GO:0005746	mitochondrial respiratory chain	1.62412e-21	3.57307e-20	2.00878e-20	13
m13	CC	GO:0044455	mitochondrial membrane part	3.08309e-21	5.42624e-20	3.05064e-20	16
m13	CC	GO:0070469	respiratory chain	7.28939e-21	1.06911e-19	6.01055e-20	13
m13	CC	GO:0098803	respiratory chain complex	4.7044e-18	5.91411e-17	3.32492e-17	11
m13	CC	GO:0005747	mitochondrial respiratory chain complex I	1.29991e-17	1.14392e-16	6.43111e-17	10
m13	CC	GO:0030964	NADH dehydrogenase complex	1.29991e-17	1.14392e-16	6.43111e-17	10
m13	CC	GO:0045271	respiratory chain complex I	1.29991e-17	1.14392e-16	6.43111e-17	10
m13	CC	GO:0098800	inner mitochondrial membrane protein complex	2.15261e-17	1.72209e-16	9.68159e-17	12
m13	CC	GO:1990204	oxidoreductase complex	9.53949e-15	6.99562e-14	3.93295e-14	10
m13	CC	GO:0005759	mitochondrial matrix	3.25076e-14	2.20051e-13	1.23713e-13	15
m13	CC	GO:0000313	organellar ribosome	2.4119e-13	1.41498e-12	7.95505e-13	9
m13	CC	GO:0005761	mitochondrial ribosome	2.4119e-13	1.41498e-12	7.95505e-13	9
m13	CC	GO:0044391	ribosomal subunit	1.75172e-10	9.63446e-10	5.4165e-10	9
m13	CC	GO:0005840	ribosome	2.16842e-10	1.12247e-09	6.31056e-10	10
m13	CC	GO:0000315	organellar large ribosomal subunit	1.62472e-07	7.52501e-07	4.23057e-07	5
m13	CC	GO:0005762	mitochondrial large ribosomal subunit	1.62472e-07	7.52501e-07	4.23057e-07	5
m13	CC	GO:0000314	organellar small ribosomal subunit	4.1111e-07	1.72275e-06	9.68531e-07	4
m13	CC	GO:0005763	mitochondrial small ribosomal subunit	4.1111e-07	1.72275e-06	9.68531e-07	4
m13	CC	GO:0015934	large ribosomal subunit	4.75829e-06	1.90332e-05	1.07005e-05	5
m13	CC	GO:0015935	small ribosomal subunit	1.67944e-05	6.4257e-05	3.61254e-05	4
m13	MF	GO:0003954	NADH dehydrogenase activity	9.10327e-16	1.39583e-14	8.94356e-15	9
m13	MF	GO:0008137	NADH dehydrogenase (ubiquinone) activity	9.10327e-16	1.39583e-14	8.94356e-15	9
m13	MF	GO:0050136	NADH dehydrogenase (quinone) activity	9.10327e-16	1.39583e-14	8.94356e-15	9
m13	MF	GO:0016655	oxidoreductase activity, acting on NAD(P)H, quinone or similar compound as acceptor	9.05492e-15	1.04132e-13	6.67205e-14	9
m13	MF	GO:0016651	oxidoreductase activity, acting on NAD(P)H	1.22108e-12	1.12339e-11	7.19794e-12	9
m13	MF	GO:0009055	electron transfer activity	3.50224e-06	2.68505e-05	1.7204e-05	5
m13	MF	GO:0004129	cytochrome-c oxidase activity	1.23499e-05	6.31217e-05	4.04441e-05	3
m13	MF	GO:0015002	heme-copper terminal oxidase activity	1.23499e-05	6.31217e-05	4.04441e-05	3
m13	MF	GO:0016676	oxidoreductase activity, acting on a heme group of donors, oxygen as acceptor	1.23499e-05	6.31217e-05	4.04441e-05	3
m13	MF	GO:0016675	oxidoreductase activity, acting on a heme group of donors	1.45049e-05	6.67226e-05	4.27513e-05	3
m13	MF	GO:0003735	structural constituent of ribosome	0.000547114	0.00228793	0.00146595	4
m13	MF	GO:0015078	proton transmembrane transporter activity	0.000640484	0.00245519	0.00157312	3
m14	BP	GO:0001819	positive regulation of cytokine production	8.37895e-32	2.90331e-28	1.64933e-28	43
m14	BP	GO:0070661	leukocyte proliferation	2.70256e-30	4.68219e-27	2.65989e-27	35
m14	BP	GO:0098542	defense response to other organism	3.66905e-28	4.23775e-25	2.40741e-25	41
m14	BP	GO:0002694	regulation of leukocyte activation	8.94322e-28	7.74706e-25	4.40101e-25	41
m14	BP	GO:0032943	mononuclear cell proliferation	1.8238e-26	1.13279e-23	6.43523e-24	31
m14	BP	GO:0050900	leukocyte migration	1.96154e-26	1.13279e-23	6.43523e-24	39
m14	BP	GO:0002521	leukocyte differentiation	8.03701e-26	3.50479e-23	1.99103e-23	39
m14	BP	GO:0002440	production of molecular mediator of immune response	8.09187e-26	3.50479e-23	1.99103e-23	28
m14	BP	GO:0070663	regulation of leukocyte proliferation	2.07824e-24	8.00123e-22	4.54539e-22	28
m14	BP	GO:0051249	regulation of lymphocyte activation	2.35183e-24	8.14908e-22	4.62939e-22	35
m14	BP	GO:0050867	positive regulation of cell activation	3.6864e-24	1.16121e-21	6.59671e-22	32
m14	BP	GO:0046651	lymphocyte proliferation	4.80638e-24	1.38784e-21	7.88415e-22	29
m14	BP	GO:0042110	T cell activation	5.57193e-24	1.48513e-21	8.43685e-22	36
m14	BP	GO:0007159	leukocyte cell-cell adhesion	8.79836e-24	2.1776e-21	1.23706e-21	32
m14	BP	GO:0002696	positive regulation of leukocyte activation	1.37467e-23	3.17548e-21	1.80395e-21	31
m14	BP	GO:0002697	regulation of immune effector process	5.66197e-23	1.22617e-20	6.96571e-21	35
m14	BP	GO:0002460	adaptive immune response based on somatic recombination of immune receptors built from immunoglobulin superfamily domains	7.56902e-23	1.54274e-20	8.76412e-21	30
m14	BP	GO:0032944	regulation of mononuclear cell proliferation	1.23156e-22	2.37076e-20	1.3468e-20	26
m14	BP	GO:0002685	regulation of leukocyte migration	3.69012e-22	6.72961e-20	3.823e-20	25
m14	BP	GO:0002819	regulation of adaptive immune response	8.51509e-22	1.47524e-19	8.38064e-20	23
m14	BP	GO:0045785	positive regulation of cell adhesion	1.56846e-21	2.58797e-19	1.47019e-19	32
m14	BP	GO:0050670	regulation of lymphocyte proliferation	2.03074e-21	3.19841e-19	1.81698e-19	25
m14	BP	GO:0002237	response to molecule of bacterial origin	4.06611e-21	6.12568e-19	3.47992e-19	29
m14	BP	GO:0051251	positive regulation of lymphocyte activation	6.01002e-21	8.67696e-19	4.92927e-19	27
m14	BP	GO:0032103	positive regulation of response to external stimulus	6.97419e-21	9.66623e-19	5.49126e-19	29
m14	BP	GO:0032496	response to lipopolysaccharide	1.53093e-20	1.9647e-18	1.11612e-18	28
m14	BP	GO:1903037	regulation of leukocyte cell-cell adhesion	1.53093e-20	1.9647e-18	1.11612e-18	28
m14	BP	GO:0070665	positive regulation of leukocyte proliferation	3.48262e-20	4.30974e-18	2.44831e-18	21
m14	BP	GO:0051091	positive regulation of DNA-binding transcription factor activity	8.01369e-20	9.57498e-18	5.43942e-18	26
m14	BP	GO:0032946	positive regulation of mononuclear cell proliferation	2.19922e-19	2.5401e-17	1.44299e-17	20
m14	BP	GO:0042113	B cell activation	2.29574e-19	2.56605e-17	1.45774e-17	24
m14	BP	GO:0042742	defense response to bacterium	3.51744e-19	3.80873e-17	2.16369e-17	25
m14	BP	GO:0042088	T-helper 1 type immune response	7.64317e-19	8.02533e-17	4.55908e-17	14
m14	BP	GO:0002822	regulation of adaptive immune response based on somatic recombination of immune receptors built from immunoglobulin superfamily domains	9.11383e-19	9.28806e-17	5.27643e-17	20
m14	BP	GO:0002700	regulation of production of molecular mediator of immune response	1.42948e-18	1.41519e-16	8.03948e-17	20
m14	BP	GO:0002687	positive regulation of leukocyte migration	2.25478e-18	2.17023e-16	1.23288e-16	19
m14	BP	GO:1903039	positive regulation of leukocyte cell-cell adhesion	3.20434e-18	3.00082e-16	1.70473e-16	23
m14	BP	GO:0050671	positive regulation of lymphocyte proliferation	4.26355e-18	3.88768e-16	2.20854e-16	19
m14	BP	GO:0051092	positive regulation of NF-kappaB transcription factor activity	6.80387e-18	5.88139e-16	3.34114e-16	20
m14	BP	GO:0050863	regulation of T cell activation	6.94292e-18	5.88139e-16	3.34114e-16	26
m14	BP	GO:0045088	regulation of innate immune response	6.95922e-18	5.88139e-16	3.34114e-16	30
m14	BP	GO:0022407	regulation of cell-cell adhesion	2.41826e-17	1.99506e-15	1.13337e-15	28
m14	BP	GO:0002703	regulation of leukocyte mediated immunity	3.29303e-17	2.60608e-15	1.48048e-15	21
m14	BP	GO:0051090	regulation of DNA-binding transcription factor activity	3.30931e-17	2.60608e-15	1.48048e-15	29
m14	BP	GO:0002367	cytokine production involved in immune response	4.39156e-17	3.3815e-15	1.92099e-15	17
m14	BP	GO:0050727	regulation of inflammatory response	7.22614e-17	5.44317e-15	3.09219e-15	30
m14	BP	GO:0022409	positive regulation of cell-cell adhesion	1.1376e-16	8.38679e-15	4.76443e-15	23
m14	BP	GO:0002683	negative regulation of immune system process	1.25526e-16	9.06143e-15	5.14768e-15	29
m14	BP	GO:0050870	positive regulation of T cell activation	1.34286e-16	9.49591e-15	5.3945e-15	21
m14	BP	GO:0071222	cellular response to lipopolysaccharide	1.90754e-16	1.32192e-14	7.50968e-15	20
m14	BP	GO:0042098	T cell proliferation	2.13385e-16	1.44976e-14	8.23591e-15	20
m14	BP	GO:0030098	lymphocyte differentiation	3.07564e-16	2.04944e-14	1.16426e-14	25
m14	BP	GO:0060759	regulation of response to cytokine stimulus	4.12009e-16	2.64372e-14	1.50187e-14	20
m14	BP	GO:0071219	cellular response to molecule of bacterial origin	4.12009e-16	2.64372e-14	1.50187e-14	20
m14	BP	GO:0001959	regulation of cytokine-mediated signaling pathway	1.53633e-15	9.67889e-14	5.49845e-14	19
m14	BP	GO:0002446	neutrophil mediated immunity	1.79794e-15	1.11247e-13	6.31981e-14	29
m14	BP	GO:0043062	extracellular structure organization	1.95835e-15	1.19047e-13	6.76291e-14	26
m14	BP	GO:0032635	interleukin-6 production	2.21191e-15	1.29903e-13	7.3796e-14	18
m14	BP	GO:0042129	regulation of T cell proliferation	2.21191e-15	1.29903e-13	7.3796e-14	18
m14	BP	GO:0002449	lymphocyte mediated immunity	3.36716e-15	1.94454e-13	1.10467e-13	23
m14	BP	GO:0071216	cellular response to biotic stimulus	4.16264e-15	2.36452e-13	1.34325e-13	20
m14	BP	GO:0030198	extracellular matrix organization	5.85011e-15	3.26946e-13	1.85734e-13	24
m14	BP	GO:0032675	regulation of interleukin-6 production	1.11519e-14	6.13356e-13	3.48439e-13	17
m14	BP	GO:0042089	cytokine biosynthetic process	1.74562e-14	9.45092e-13	5.36894e-13	16
m14	BP	GO:0042107	cytokine metabolic process	1.99582e-14	1.06393e-12	6.04403e-13	16
m14	BP	GO:0034341	response to interferon-gamma	3.14226e-14	1.64969e-12	9.37164e-13	18
m14	BP	GO:0050707	regulation of cytokine secretion	3.43249e-14	1.76583e-12	1.00314e-12	19
m14	BP	GO:0050663	cytokine secretion	3.4654e-14	1.76583e-12	1.00314e-12	20
m14	BP	GO:0032609	interferon-gamma production	4.16284e-14	2.09047e-12	1.18757e-12	15
m14	BP	GO:0045089	positive regulation of innate immune response	6.7169e-14	3.32487e-12	1.88881e-12	24
m14	BP	GO:0050864	regulation of B cell activation	8.45276e-14	4.12518e-12	2.34346e-12	15
m14	BP	GO:0002285	lymphocyte activation involved in immune response	9.62904e-14	4.63398e-12	2.6325e-12	17
m14	BP	GO:0002706	regulation of lymphocyte mediated immunity	1.29574e-13	6.15032e-12	3.49392e-12	16
m14	BP	GO:0032649	regulation of interferon-gamma production	1.43255e-13	6.70783e-12	3.81063e-12	14
m14	BP	GO:1903706	regulation of hemopoiesis	1.71708e-13	7.93289e-12	4.50657e-12	26
m14	BP	GO:0007249	I-kappaB kinase/NF-kappaB signaling	2.10919e-13	9.49138e-12	5.39193e-12	20
m14	BP	GO:0060326	cell chemotaxis	2.10919e-13	9.49138e-12	5.39193e-12	20
m14	BP	GO:0001818	negative regulation of cytokine production	2.83792e-13	1.26069e-11	7.16183e-12	21
m14	BP	GO:0042108	positive regulation of cytokine biosynthetic process	4.42882e-13	1.94251e-11	1.10352e-11	12
m14	BP	GO:1902105	regulation of leukocyte differentiation	5.7869e-13	2.50645e-11	1.42388e-11	20
m14	BP	GO:0050708	regulation of protein secretion	7.06348e-13	3.0216e-11	1.71653e-11	25
m14	BP	GO:0042119	neutrophil activation	7.50462e-13	3.17116e-11	1.80149e-11	26
m14	BP	GO:0050729	positive regulation of inflammatory response	8.29098e-13	3.42003e-11	1.94287e-11	16
m14	BP	GO:0071346	cellular response to interferon-gamma	8.29098e-13	3.42003e-11	1.94287e-11	16
m14	BP	GO:0001906	cell killing	1.12274e-12	4.57681e-11	2.60002e-11	16
m14	BP	GO:0050731	positive regulation of peptidyl-tyrosine phosphorylation	1.19102e-12	4.7987e-11	2.72608e-11	17
m14	BP	GO:0046631	alpha-beta T cell activation	1.45528e-12	5.79602e-11	3.29264e-11	15
m14	BP	GO:0042035	regulation of cytokine biosynthetic process	1.55098e-12	6.107e-11	3.4693e-11	14
m14	BP	GO:0050871	positive regulation of B cell activation	1.6705e-12	6.50368e-11	3.69466e-11	12
m14	BP	GO:0034612	response to tumor necrosis factor	1.821e-12	7.01084e-11	3.98277e-11	20
m14	BP	GO:0042102	positive regulation of T cell proliferation	1.89763e-12	7.22558e-11	4.10476e-11	13
m14	BP	GO:0042100	B cell proliferation	1.9944e-12	7.51151e-11	4.26719e-11	12
m14	BP	GO:0002791	regulation of peptide secretion	2.51137e-12	9.35689e-11	5.31553e-11	25
m14	BP	GO:0043122	regulation of I-kappaB kinase/NF-kappaB signaling	2.72873e-12	1.00586e-10	5.71414e-11	18
m14	BP	GO:0002699	positive regulation of immune effector process	3.92215e-12	1.43055e-10	8.12678e-11	17
m14	BP	GO:0097529	myeloid leukocyte migration	4.25468e-12	1.53567e-10	8.72396e-11	16
m14	BP	GO:0043123	positive regulation of I-kappaB kinase/NF-kappaB signaling	5.09422e-12	1.81974e-10	1.03377e-10	16
m14	BP	GO:0071356	cellular response to tumor necrosis factor	5.27142e-12	1.86382e-10	1.05881e-10	19
m14	BP	GO:0002377	immunoglobulin production	5.82413e-12	2.03845e-10	1.15801e-10	13
m14	BP	GO:0032755	positive regulation of interleukin-6 production	1.01782e-11	3.52675e-10	2.0035e-10	12
m14	BP	GO:0050730	regulation of peptidyl-tyrosine phosphorylation	1.23466e-11	4.23575e-10	2.40628e-10	18
m14	BP	GO:0002576	platelet degranulation	1.27317e-11	4.32503e-10	2.45699e-10	14
m14	BP	GO:0032640	tumor necrosis factor production	1.37029e-11	4.57084e-10	2.59664e-10	15
m14	BP	GO:0002718	regulation of cytokine production involved in immune response	1.37191e-11	4.57084e-10	2.59664e-10	12
m14	BP	GO:0043312	neutrophil degranulation	1.84312e-11	6.0823e-10	3.45527e-10	24
m14	BP	GO:0009615	response to virus	1.91501e-11	6.25992e-10	3.55618e-10	20
m14	BP	GO:0002283	neutrophil activation involved in immune response	2.09565e-11	6.78637e-10	3.85525e-10	24
m14	BP	GO:0071706	tumor necrosis factor superfamily cytokine production	2.37301e-11	7.61341e-10	4.32508e-10	15
m14	BP	GO:2001234	negative regulation of apoptotic signaling pathway	2.63714e-11	8.38321e-10	4.76239e-10	17
m14	BP	GO:0002286	T cell activation involved in immune response	2.79615e-11	8.72851e-10	4.95855e-10	12
m14	BP	GO:0002456	T cell mediated immunity	2.79615e-11	8.72851e-10	4.95855e-10	12
m14	BP	GO:0035710	CD4-positive, alpha-beta T cell activation	3.67051e-11	1.13556e-09	6.45098e-10	12
m14	BP	GO:0033209	tumor necrosis factor-mediated signaling pathway	4.01665e-11	1.23166e-09	6.99687e-10	15
m14	BP	GO:0032655	regulation of interleukin-12 production	4.63408e-11	1.40852e-09	8.00159e-10	10
m14	BP	GO:0030217	T cell differentiation	5.64986e-11	1.70233e-09	9.6707e-10	17
m14	BP	GO:0050777	negative regulation of immune response	5.77808e-11	1.7112e-09	9.7211e-10	14
m14	BP	GO:1902107	positive regulation of leukocyte differentiation	5.77808e-11	1.7112e-09	9.7211e-10	14
m14	BP	GO:0002825	regulation of T-helper 1 type immune response	5.92894e-11	1.741e-09	9.89039e-10	8
m14	BP	GO:0032615	interleukin-12 production	6.84221e-11	1.97569e-09	1.12236e-09	10
m14	BP	GO:0032722	positive regulation of chemokine production	6.84221e-11	1.97569e-09	1.12236e-09	10
m14	BP	GO:0042116	macrophage activation	7.98259e-11	2.28592e-09	1.2986e-09	12
m14	BP	GO:0002369	T cell cytokine production	8.20739e-11	2.33103e-09	1.32423e-09	9
m14	BP	GO:0002224	toll-like receptor signaling pathway	8.39045e-11	2.36365e-09	1.34276e-09	14
m14	BP	GO:0150076	neuroinflammatory response	9.89381e-11	2.76468e-09	1.57058e-09	11
m14	BP	GO:0032680	regulation of tumor necrosis factor production	1.2046e-10	3.33916e-09	1.89694e-09	14
m14	BP	GO:0097191	extrinsic apoptotic signaling pathway	1.29943e-10	3.57342e-09	2.03002e-09	16
m14	BP	GO:1903708	positive regulation of hemopoiesis	1.36925e-10	3.7358e-09	2.12226e-09	15
m14	BP	GO:0045123	cellular extravasation	1.42407e-10	3.85499e-09	2.18997e-09	10
m14	BP	GO:0032642	regulation of chemokine production	1.52454e-10	4.09498e-09	2.3263e-09	11
m14	BP	GO:1903555	regulation of tumor necrosis factor superfamily cytokine production	1.71093e-10	4.56028e-09	2.59063e-09	14
m14	BP	GO:0002690	positive regulation of leukocyte chemotaxis	2.01323e-10	5.32506e-09	3.0251e-09	11
m14	BP	GO:0043410	positive regulation of MAPK cascade	2.06048e-10	5.40875e-09	3.07264e-09	23
m14	BP	GO:0030099	myeloid cell differentiation	2.0882e-10	5.44031e-09	3.09057e-09	21
m14	BP	GO:0002828	regulation of type 2 immune response	2.15285e-10	5.56687e-09	3.16247e-09	8
m14	BP	GO:0050921	positive regulation of chemotaxis	2.20018e-10	5.64713e-09	3.20806e-09	13
m14	BP	GO:0002637	regulation of immunoglobulin production	2.37998e-10	6.01943e-09	3.41956e-09	10
m14	BP	GO:0032729	positive regulation of interferon-gamma production	2.37998e-10	6.01943e-09	3.41956e-09	10
m14	BP	GO:0002758	innate immune response-activating signal transduction	3.10269e-10	7.79045e-09	4.42565e-09	18
m14	BP	GO:2000377	regulation of reactive oxygen species metabolic process	3.36931e-10	8.39904e-09	4.77139e-09	15
m14	BP	GO:0032602	chemokine production	3.90474e-10	9.59568e-09	5.45118e-09	11
m14	BP	GO:0050830	defense response to Gram-positive bacterium	3.90474e-10	9.59568e-09	5.45118e-09	11
m14	BP	GO:0002221	pattern recognition receptor signaling pathway	4.17796e-10	1.01948e-08	5.79153e-09	15
m14	BP	GO:1904019	epithelial cell apoptotic process	4.47492e-10	1.08431e-08	6.15981e-09	12
m14	BP	GO:0032648	regulation of interferon-beta production	4.72696e-10	1.13743e-08	6.46156e-09	9
m14	BP	GO:0051873	killing by host of symbiont cells	4.92153e-10	1.17608e-08	6.68113e-09	6
m14	BP	GO:1904035	regulation of epithelial cell apoptotic process	5.02824e-10	1.19335e-08	6.77925e-09	11
m14	BP	GO:0035743	CD4-positive, alpha-beta T cell cytokine production	5.16543e-10	1.21757e-08	6.91683e-09	7
m14	BP	GO:0030183	B cell differentiation	5.51924e-10	1.28683e-08	7.31032e-09	12
m14	BP	GO:0002573	myeloid leukocyte differentiation	5.53356e-10	1.28683e-08	7.31032e-09	15
m14	BP	GO:0002824	positive regulation of adaptive immune response based on somatic recombination of immune receptors built from immunoglobulin superfamily domains	5.69214e-10	1.31488e-08	7.46968e-09	11
m14	BP	GO:0048771	tissue remodeling	5.84922e-10	1.34222e-08	7.62499e-09	14
m14	BP	GO:0032735	positive regulation of interleukin-12 production	6.47274e-10	1.47553e-08	8.38228e-09	8
m14	BP	GO:0032608	interferon-beta production	6.95144e-10	1.5743e-08	8.94337e-09	9
m14	BP	GO:0060333	interferon-gamma-mediated signaling pathway	7.26055e-10	1.63362e-08	9.2804e-09	11
m14	BP	GO:0002705	positive regulation of leukocyte mediated immunity	8.29285e-10	1.84917e-08	1.05049e-08	12
m14	BP	GO:0042092	type 2 immune response	8.32527e-10	1.84917e-08	1.05049e-08	8
m14	BP	GO:1901652	response to peptide	8.97237e-10	1.98021e-08	1.12493e-08	22
m14	BP	GO:0002702	positive regulation of production of molecular mediator of immune response	9.20595e-10	2.0189e-08	1.14691e-08	11
m14	BP	GO:0002218	activation of innate immune response	9.2788e-10	2.02208e-08	1.14872e-08	18
m14	BP	GO:0002821	positive regulation of adaptive immune response	1.03438e-09	2.24009e-08	1.27257e-08	11
m14	BP	GO:0050829	defense response to Gram-negative bacterium	1.09683e-09	2.36058e-08	1.34101e-08	10
m14	BP	GO:0009636	response to toxic substance	1.21219e-09	2.59274e-08	1.4729e-08	22
m14	BP	GO:0097696	STAT cascade	1.31377e-09	2.79278e-08	1.58654e-08	13
m14	BP	GO:0046677	response to antibiotic	1.44583e-09	3.05475e-08	1.73537e-08	18
m14	BP	GO:0001909	leukocyte mediated cytotoxicity	1.45527e-09	3.05607e-08	1.73611e-08	11
m14	BP	GO:0052548	regulation of endopeptidase activity	1.48596e-09	3.10173e-08	1.76205e-08	19
m14	BP	GO:0070555	response to interleukin-1	1.54102e-09	3.19738e-08	1.81639e-08	14
m14	BP	GO:0051852	disruption by host of symbiont cells	1.57526e-09	3.24897e-08	1.8457e-08	6
m14	BP	GO:0046632	alpha-beta T cell differentiation	1.81523e-09	3.72175e-08	2.11428e-08	11
m14	BP	GO:0030595	leukocyte chemotaxis	2.19046e-09	4.46467e-08	2.53632e-08	14
m14	BP	GO:2000379	positive regulation of reactive oxygen species metabolic process	2.25293e-09	4.56514e-08	2.5934e-08	11
m14	BP	GO:0050673	epithelial cell proliferation	2.41108e-09	4.8572e-08	2.75931e-08	20
m14	BP	GO:0051883	killing of cells in other organism involved in symbiotic interaction	2.60547e-09	5.21847e-08	2.96454e-08	6
m14	BP	GO:0045765	regulation of angiogenesis	2.62773e-09	5.23281e-08	2.97269e-08	19
m14	BP	GO:0042093	T-helper cell differentiation	2.77448e-09	5.49347e-08	3.12077e-08	9
m14	BP	GO:2000351	regulation of endothelial cell apoptotic process	3.24825e-09	6.39499e-08	3.63291e-08	9
m14	BP	GO:0050715	positive regulation of cytokine secretion	3.35307e-09	6.55141e-08	3.72177e-08	12
m14	BP	GO:0018108	peptidyl-tyrosine phosphorylation	3.36551e-09	6.55141e-08	3.72177e-08	18
m14	BP	GO:0002688	regulation of leukocyte chemotaxis	3.42156e-09	6.62329e-08	3.76261e-08	11
m14	BP	GO:0019730	antimicrobial humoral response	3.78765e-09	7.25841e-08	4.12341e-08	11
m14	BP	GO:0002294	CD4-positive, alpha-beta T cell differentiation involved in immune response	3.79155e-09	7.25841e-08	4.12341e-08	9
m14	BP	GO:0018212	peptidyl-tyrosine modification	3.85455e-09	7.33848e-08	4.16889e-08	18
m14	BP	GO:0072593	reactive oxygen species metabolic process	3.95093e-09	7.48085e-08	4.24978e-08	16
m14	BP	GO:0031341	regulation of cell killing	4.04386e-09	7.6152e-08	4.3261e-08	10
m14	BP	GO:0002287	alpha-beta T cell activation involved in immune response	4.41296e-09	8.22092e-08	4.6702e-08	9
m14	BP	GO:0002293	alpha-beta T cell differentiation involved in immune response	4.41296e-09	8.22092e-08	4.6702e-08	9
m14	BP	GO:0008625	extrinsic apoptotic signaling pathway via death domain receptors	4.56167e-09	8.45251e-08	4.80176e-08	10
m14	BP	GO:2001233	regulation of apoptotic signaling pathway	4.7319e-09	8.72129e-08	4.95445e-08	19
m14	BP	GO:0052547	regulation of peptidase activity	4.93016e-09	9.03862e-08	5.13472e-08	19
m14	BP	GO:0051818	disruption of cells of other organism involved in symbiotic interaction	6.34503e-09	1.15713e-07	6.57352e-08	6
m14	BP	GO:0035666	TRIF-dependent toll-like receptor signaling pathway	6.51703e-09	1.18228e-07	6.71636e-08	7
m14	BP	GO:0007259	JAK-STAT cascade	6.57241e-09	1.18612e-07	6.73816e-08	12
m14	BP	GO:0048872	homeostasis of number of cells	6.71705e-09	1.20594e-07	6.85077e-08	15
m14	BP	GO:0050878	regulation of body fluid levels	6.76625e-09	1.20851e-07	6.86537e-08	21
m14	BP	GO:0001910	regulation of leukocyte mediated cytotoxicity	6.84495e-09	1.21629e-07	6.90961e-08	9
m14	BP	GO:0002820	negative regulation of adaptive immune response	7.05172e-09	1.24664e-07	7.08202e-08	8
m14	BP	GO:0072577	endothelial cell apoptotic process	7.88284e-09	1.3865e-07	7.87652e-08	9
m14	BP	GO:1904894	positive regulation of STAT cascade	8.13759e-09	1.42408e-07	8.09e-08	10
m14	BP	GO:0042063	gliogenesis	9.00549e-09	1.56804e-07	8.90783e-08	16
m14	BP	GO:0002292	T cell differentiation involved in immune response	9.05605e-09	1.56896e-07	8.91306e-08	9
m14	BP	GO:0046634	regulation of alpha-beta T cell activation	1.01521e-08	1.75011e-07	9.94214e-08	10
m14	BP	GO:0007596	blood coagulation	1.14014e-08	1.95573e-07	1.11103e-07	17
m14	BP	GO:0071674	mononuclear cell migration	1.18691e-08	2.02593e-07	1.1509e-07	9
m14	BP	GO:0045063	T-helper 1 cell differentiation	1.36996e-08	2.32692e-07	1.32189e-07	6
m14	BP	GO:0007599	hemostasis	1.4231e-08	2.39991e-07	1.36336e-07	17
m14	BP	GO:1901342	regulation of vasculature development	1.42679e-08	2.39991e-07	1.36336e-07	19
m14	BP	GO:0050817	coagulation	1.4869e-08	2.48894e-07	1.41394e-07	17
m14	BP	GO:0001935	endothelial cell proliferation	1.68693e-08	2.78704e-07	1.58328e-07	13
m14	BP	GO:0001774	microglial cell activation	1.68911e-08	2.78704e-07	1.58328e-07	8
m14	BP	GO:0002269	leukocyte activation involved in inflammatory response	1.68911e-08	2.78704e-07	1.58328e-07	8
m14	BP	GO:0002756	MyD88-independent toll-like receptor signaling pathway	1.72943e-08	2.84004e-07	1.61339e-07	7
m14	BP	GO:0034121	regulation of toll-like receptor signaling pathway	1.75191e-08	2.86339e-07	1.62665e-07	9
m14	BP	GO:0050920	regulation of chemotaxis	1.79937e-08	2.92715e-07	1.66287e-07	13
m14	BP	GO:0032479	regulation of type I interferon production	1.83553e-08	2.97201e-07	1.68836e-07	11
m14	BP	GO:2000116	regulation of cysteine-type endopeptidase activity	1.85328e-08	2.9868e-07	1.69676e-07	14
m14	BP	GO:0042832	defense response to protozoan	1.94221e-08	3.11563e-07	1.76995e-07	6
m14	BP	GO:0032606	type I interferon production	2.1739e-08	3.47123e-07	1.97196e-07	11
m14	BP	GO:0071347	cellular response to interleukin-1	2.23253e-08	3.54849e-07	2.01585e-07	12
m14	BP	GO:0043367	CD4-positive, alpha-beta T cell differentiation	2.53939e-08	4.0178e-07	2.28246e-07	9
m14	BP	GO:0001562	response to protozoan	2.69843e-08	4.25003e-07	2.41439e-07	6
m14	BP	GO:0010595	positive regulation of endothelial cell migration	3.02169e-08	4.73763e-07	2.69138e-07	11
m14	BP	GO:0007162	negative regulation of cell adhesion	3.23617e-08	5.05104e-07	2.86943e-07	15
m14	BP	GO:0043281	regulation of cysteine-type endopeptidase activity involved in apoptotic process	3.35797e-08	5.21765e-07	2.96408e-07	13
m14	BP	GO:0048305	immunoglobulin secretion	3.68216e-08	5.69584e-07	3.23573e-07	6
m14	BP	GO:0071887	leukocyte apoptotic process	3.77854e-08	5.81895e-07	3.30567e-07	10
m14	BP	GO:0045619	regulation of lymphocyte differentiation	3.90234e-08	5.98301e-07	3.39887e-07	12
m14	BP	GO:0032760	positive regulation of tumor necrosis factor production	4.06038e-08	6.19789e-07	3.52094e-07	9
m14	BP	GO:1902042	negative regulation of extrinsic apoptotic signaling pathway via death domain receptors	4.9152e-08	7.41556e-07	4.21268e-07	7
m14	BP	GO:0030888	regulation of B cell proliferation	4.92231e-08	7.41556e-07	4.21268e-07	8
m14	BP	GO:1902041	regulation of extrinsic apoptotic signaling pathway via death domain receptors	4.92231e-08	7.41556e-07	4.21268e-07	8
m14	BP	GO:0043536	positive regulation of blood vessel endothelial cell migration	5.08282e-08	7.59513e-07	4.3147e-07	9
m14	BP	GO:0045766	positive regulation of angiogenesis	5.08534e-08	7.59513e-07	4.3147e-07	13
m14	BP	GO:0051098	regulation of binding	5.38007e-08	8.00083e-07	4.54517e-07	17
m14	BP	GO:0046209	nitric oxide metabolic process	5.67344e-08	8.36531e-07	4.75222e-07	9
m14	BP	GO:1903557	positive regulation of tumor necrosis factor superfamily cytokine production	5.67344e-08	8.36531e-07	4.75222e-07	9
m14	BP	GO:0001936	regulation of endothelial cell proliferation	5.81318e-08	8.53502e-07	4.84863e-07	12
m14	BP	GO:0030890	positive regulation of B cell proliferation	5.94426e-08	8.69066e-07	4.93705e-07	7
m14	BP	GO:0061900	glial cell activation	6.50323e-08	9.46794e-07	5.37861e-07	8
m14	BP	GO:0010634	positive regulation of epithelial cell migration	7.05215e-08	1.02241e-06	5.8082e-07	12
m14	BP	GO:0002823	negative regulation of adaptive immune response based on somatic recombination of immune receptors built from immunoglobulin superfamily domains	7.14967e-08	1.03223e-06	5.86398e-07	7
m14	BP	GO:0031640	killing of cells of other organism	7.4454e-08	1.06605e-06	6.05607e-07	8
m14	BP	GO:0044364	disruption of cells of other organism	7.4454e-08	1.06605e-06	6.05607e-07	8
m14	BP	GO:0048871	multicellular organismal homeostasis	7.53142e-08	1.0701e-06	6.07908e-07	19
m14	BP	GO:0035723	interleukin-15-mediated signaling pathway	7.56634e-08	1.0701e-06	6.07908e-07	5
m14	BP	GO:0071350	cellular response to interleukin-15	7.56634e-08	1.0701e-06	6.07908e-07	5
m14	BP	GO:0001776	leukocyte homeostasis	7.81933e-08	1.09692e-06	6.23147e-07	9
m14	BP	GO:2001057	reactive nitrogen species metabolic process	7.81933e-08	1.09692e-06	6.23147e-07	9
m14	BP	GO:0002709	regulation of T cell mediated immunity	8.50262e-08	1.17924e-06	6.69909e-07	8
m14	BP	GO:0030194	positive regulation of blood coagulation	8.54224e-08	1.17924e-06	6.69909e-07	6
m14	BP	GO:0050901	leukocyte tethering or rolling	8.54224e-08	1.17924e-06	6.69909e-07	6
m14	BP	GO:1900048	positive regulation of hemostasis	8.54224e-08	1.17924e-06	6.69909e-07	6
m14	BP	GO:0046427	positive regulation of JAK-STAT cascade	8.6769e-08	1.19307e-06	6.77769e-07	9
m14	BP	GO:1903532	positive regulation of secretion by cell	8.87333e-08	1.21526e-06	6.90373e-07	17
m14	BP	GO:0050714	positive regulation of protein secretion	1.10125e-07	1.4975e-06	8.50711e-07	14
m14	BP	GO:0050820	positive regulation of coagulation	1.10206e-07	1.4975e-06	8.50711e-07	6
m14	BP	GO:0070672	response to interleukin-15	1.16824e-07	1.58122e-06	8.98273e-07	5
m14	BP	GO:0002698	negative regulation of immune effector process	1.17921e-07	1.58986e-06	9.03181e-07	10
m14	BP	GO:0032102	negative regulation of response to external stimulus	1.18653e-07	1.59354e-06	9.05269e-07	16
m14	BP	GO:0002526	acute inflammatory response	1.30398e-07	1.74452e-06	9.91036e-07	13
m14	BP	GO:0045428	regulation of nitric oxide biosynthetic process	1.41255e-07	1.8825e-06	1.06942e-06	8
m14	BP	GO:0030225	macrophage differentiation	1.42482e-07	1.89157e-06	1.07458e-06	7
m14	BP	GO:0050764	regulation of phagocytosis	1.43107e-07	1.89261e-06	1.07517e-06	9
m14	BP	GO:0030100	regulation of endocytosis	1.4647e-07	1.92973e-06	1.09625e-06	14
m14	BP	GO:0033135	regulation of peptidyl-serine phosphorylation	1.5021e-07	1.9715e-06	1.11998e-06	10
m14	BP	GO:0002708	positive regulation of lymphocyte mediated immunity	1.57571e-07	2.06032e-06	1.17044e-06	9
m14	BP	GO:0061756	leukocyte adhesion to vascular endothelial cell	1.6743e-07	2.18099e-06	1.23899e-06	7
m14	BP	GO:0002467	germinal center formation	1.73933e-07	2.25721e-06	1.28229e-06	5
m14	BP	GO:0045621	positive regulation of lymphocyte differentiation	1.90358e-07	2.46116e-06	1.39815e-06	9
m14	BP	GO:0051403	stress-activated MAPK cascade	2.2146e-07	2.85264e-06	1.62055e-06	14
m14	BP	GO:0006953	acute-phase response	2.28482e-07	2.93218e-06	1.66574e-06	7
m14	BP	GO:0051607	defense response to virus	2.2934e-07	2.93233e-06	1.66582e-06	13
m14	BP	GO:1904018	positive regulation of vasculature development	2.41035e-07	3.07054e-06	1.74433e-06	13
m14	BP	GO:0051047	positive regulation of secretion	2.43421e-07	3.08957e-06	1.75514e-06	17
m14	BP	GO:0007568	aging	2.60528e-07	3.29463e-06	1.87164e-06	15
m14	BP	GO:0002793	positive regulation of peptide secretion	2.6473e-07	3.33233e-06	1.89305e-06	14
m14	BP	GO:0032653	regulation of interleukin-10 production	2.65432e-07	3.33233e-06	1.89305e-06	7
m14	BP	GO:0010743	regulation of macrophage derived foam cell differentiation	2.75692e-07	3.43611e-06	1.95201e-06	6
m14	BP	GO:0032728	positive regulation of interferon-beta production	2.75692e-07	3.43611e-06	1.95201e-06	6
m14	BP	GO:0006959	humoral immune response	2.76673e-07	3.43611e-06	1.95201e-06	14
m14	BP	GO:0097193	intrinsic apoptotic signaling pathway	2.891e-07	3.57761e-06	2.03239e-06	14
m14	BP	GO:0014013	regulation of gliogenesis	2.98325e-07	3.67863e-06	2.08978e-06	10
m14	BP	GO:0031098	stress-activated protein kinase signaling cascade	3.02027e-07	3.71107e-06	2.10821e-06	14
m14	BP	GO:0002532	production of molecular mediator involved in inflammatory response	3.17164e-07	3.8833e-06	2.20605e-06	8
m14	BP	GO:0050678	regulation of epithelial cell proliferation	3.18843e-07	3.8901e-06	2.20992e-06	16
m14	BP	GO:1904892	regulation of STAT cascade	3.20855e-07	3.90092e-06	2.21606e-06	10
m14	BP	GO:2001237	negative regulation of extrinsic apoptotic signaling pathway	3.56346e-07	4.31727e-06	2.45258e-06	9
m14	BP	GO:1903426	regulation of reactive oxygen species biosynthetic process	3.88148e-07	4.68617e-06	2.66215e-06	9
m14	BP	GO:0030193	regulation of blood coagulation	3.93195e-07	4.73063e-06	2.68741e-06	8
m14	BP	GO:0032613	interleukin-10 production	4.07807e-07	4.87258e-06	2.76805e-06	7
m14	BP	GO:0150077	regulation of neuroinflammatory response	4.07807e-07	4.87258e-06	2.76805e-06	7
m14	BP	GO:0033002	muscle cell proliferation	4.09828e-07	4.87991e-06	2.77221e-06	13
m14	BP	GO:0032733	positive regulation of interleukin-10 production	4.14387e-07	4.9173e-06	2.79345e-06	6
m14	BP	GO:0048608	reproductive structure development	4.31024e-07	5.09726e-06	2.89569e-06	17
m14	BP	GO:1900046	regulation of hemostasis	4.36725e-07	5.12967e-06	2.9141e-06	8
m14	BP	GO:1901224	positive regulation of NIK/NF-kappaB signaling	4.36725e-07	5.12967e-06	2.9141e-06	8
m14	BP	GO:0061458	reproductive system development	4.75327e-07	5.56422e-06	3.16096e-06	17
m14	BP	GO:0006809	nitric oxide biosynthetic process	4.84314e-07	5.62365e-06	3.19472e-06	8
m14	BP	GO:0007252	I-kappaB phosphorylation	4.85273e-07	5.62365e-06	3.19472e-06	5
m14	BP	GO:0051023	regulation of immunoglobulin secretion	4.85273e-07	5.62365e-06	3.19472e-06	5
m14	BP	GO:1901215	negative regulation of neuron death	4.95272e-07	5.72039e-06	3.24968e-06	12
m14	BP	GO:0045685	regulation of glial cell differentiation	5.36269e-07	6.15289e-06	3.49537e-06	8
m14	BP	GO:0048708	astrocyte differentiation	5.36269e-07	6.15289e-06	3.49537e-06	8
m14	BP	GO:0045637	regulation of myeloid cell differentiation	5.66087e-07	6.47357e-06	3.67755e-06	13
m14	BP	GO:0048660	regulation of smooth muscle cell proliferation	5.69555e-07	6.49181e-06	3.68791e-06	11
m14	BP	GO:1903034	regulation of response to wounding	6.0344e-07	6.85548e-06	3.89451e-06	11
m14	BP	GO:0060760	positive regulation of response to cytokine stimulus	6.09532e-07	6.87957e-06	3.90819e-06	7
m14	BP	GO:1904645	response to amyloid-beta	6.09532e-07	6.87957e-06	3.90819e-06	7
m14	BP	GO:0016485	protein processing	6.17792e-07	6.95016e-06	3.94829e-06	14
m14	BP	GO:0001938	positive regulation of endothelial cell proliferation	6.35764e-07	7.11103e-06	4.03968e-06	9
m14	BP	GO:0010001	glial cell differentiation	6.38889e-07	7.11103e-06	4.03968e-06	12
m14	BP	GO:0048659	smooth muscle cell proliferation	6.39092e-07	7.11103e-06	4.03968e-06	11
m14	BP	GO:0002831	regulation of response to biotic stimulus	6.42353e-07	7.11103e-06	4.03968e-06	10
m14	BP	GO:0045580	regulation of T cell differentiation	6.42353e-07	7.11103e-06	4.03968e-06	10
m14	BP	GO:0002827	positive regulation of T-helper 1 type immune response	6.53692e-07	7.20061e-06	4.09057e-06	5
m14	BP	GO:0050818	regulation of coagulation	6.54601e-07	7.20061e-06	4.09057e-06	8
m14	BP	GO:0007160	cell-matrix adhesion	7.05982e-07	7.74122e-06	4.39769e-06	12
m14	BP	GO:0006979	response to oxidative stress	7.19195e-07	7.86123e-06	4.46586e-06	17
m14	BP	GO:0002701	negative regulation of production of molecular mediator of immune response	7.25478e-07	7.90497e-06	4.49071e-06	6
m14	BP	GO:0045807	positive regulation of endocytosis	7.32928e-07	7.96112e-06	4.52261e-06	10
m14	BP	GO:0070997	neuron death	7.88643e-07	8.53952e-06	4.85119e-06	15
m14	BP	GO:0061041	regulation of wound healing	8.3448e-07	9.0077e-06	5.11716e-06	10
m14	BP	GO:0010742	macrophage derived foam cell differentiation	8.6397e-07	9.26828e-06	5.26519e-06	6
m14	BP	GO:0090077	foam cell differentiation	8.6397e-07	9.26828e-06	5.26519e-06	6
m14	BP	GO:2000106	regulation of leukocyte apoptotic process	8.73621e-07	9.34289e-06	5.30757e-06	8
m14	BP	GO:0032872	regulation of stress-activated MAPK cascade	9.46357e-07	1.00896e-05	5.73178e-06	12
m14	BP	GO:0045582	positive regulation of T cell differentiation	9.59301e-07	1.01963e-05	5.79236e-06	8
m14	BP	GO:0070302	regulation of stress-activated protein kinase signaling cascade	1.04125e-06	1.10335e-05	6.26798e-06	12
m14	BP	GO:0032674	regulation of interleukin-5 production	1.12703e-06	1.1906e-05	6.76364e-06	5
m14	BP	GO:0044706	multi-multicellular organism process	1.19944e-06	1.26324e-05	7.1763e-06	12
m14	BP	GO:1904037	positive regulation of epithelial cell apoptotic process	1.20603e-06	1.26634e-05	7.19389e-06	6
m14	BP	GO:1901214	regulation of neuron death	1.24998e-06	1.30851e-05	7.4335e-06	14
m14	BP	GO:0051048	negative regulation of secretion	1.25671e-06	1.3116e-05	7.451e-06	12
m14	BP	GO:0033138	positive regulation of peptidyl-serine phosphorylation	1.26067e-06	1.31177e-05	7.45201e-06	8
m14	BP	GO:0002562	somatic diversification of immune receptors via germline recombination within a single locus	1.26905e-06	1.31261e-05	7.45679e-06	7
m14	BP	GO:0016444	somatic cell DNA recombination	1.26905e-06	1.31261e-05	7.45679e-06	7
m14	BP	GO:0050866	negative regulation of cell activation	1.30344e-06	1.34417e-05	7.63608e-06	11
m14	BP	GO:0001952	regulation of cell-matrix adhesion	1.35396e-06	1.39213e-05	7.90852e-06	9
m14	BP	GO:0001890	placenta development	1.3741e-06	1.4045e-05	7.97881e-06	10
m14	BP	GO:2001236	regulation of extrinsic apoptotic signaling pathway	1.3741e-06	1.4045e-05	7.97881e-06	10
m14	BP	GO:0070942	neutrophil mediated cytotoxicity	1.39613e-06	1.41865e-05	8.05915e-06	4
m14	BP	GO:0071104	response to interleukin-9	1.39613e-06	1.41865e-05	8.05915e-06	4
m14	BP	GO:0010803	regulation of tumor necrosis factor-mediated signaling pathway	1.42253e-06	1.43287e-05	8.13996e-06	7
m14	BP	GO:0034113	heterotypic cell-cell adhesion	1.42253e-06	1.43287e-05	8.13996e-06	7
m14	BP	GO:0046635	positive regulation of alpha-beta T cell activation	1.42253e-06	1.43287e-05	8.13996e-06	7
m14	BP	GO:0032634	interleukin-5 production	1.44768e-06	1.45398e-05	8.25985e-06	5
m14	BP	GO:0000302	response to reactive oxygen species	1.51076e-06	1.51295e-05	8.59485e-06	12
m14	BP	GO:0010594	regulation of endothelial cell migration	1.58098e-06	1.5787e-05	8.96839e-06	12
m14	BP	GO:1901654	response to ketone	1.60418e-06	1.59726e-05	9.07384e-06	11
m14	BP	GO:0046425	regulation of JAK-STAT cascade	1.6744e-06	1.6624e-05	9.44388e-06	9
m14	BP	GO:0032874	positive regulation of stress-activated MAPK cascade	1.74328e-06	1.72304e-05	9.78838e-06	10
m14	BP	GO:0031589	cell-substrate adhesion	1.74542e-06	1.72304e-05	9.78838e-06	14
m14	BP	GO:0007565	female pregnancy	1.77623e-06	1.74847e-05	9.93284e-06	11
m14	BP	GO:0046718	viral entry into host cell	1.79482e-06	1.75679e-05	9.98009e-06	9
m14	BP	GO:1903038	negative regulation of leukocyte cell-cell adhesion	1.79482e-06	1.75679e-05	9.98009e-06	9
m14	BP	GO:0070304	positive regulation of stress-activated protein kinase signaling cascade	1.84807e-06	1.80382e-05	1.02473e-05	10
m14	BP	GO:0045861	negative regulation of proteolysis	1.87689e-06	1.8268e-05	1.03778e-05	14
m14	BP	GO:0002639	positive regulation of immunoglobulin production	1.91996e-06	1.86087e-05	1.05714e-05	6
m14	BP	GO:1903409	reactive oxygen species biosynthetic process	1.92263e-06	1.86087e-05	1.05714e-05	9
m14	BP	GO:0048545	response to steroid hormone	2.0704e-06	1.99644e-05	1.13415e-05	15
m14	BP	GO:0043535	regulation of blood vessel endothelial cell migration	2.07422e-06	1.99644e-05	1.13415e-05	10
m14	BP	GO:0008630	intrinsic apoptotic signaling pathway in response to DNA damage	2.11052e-06	2.02575e-05	1.1508e-05	8
m14	BP	GO:0070757	interleukin-35-mediated signaling pathway	2.17816e-06	2.0849e-05	1.1844e-05	4
m14	BP	GO:0045429	positive regulation of nitric oxide biosynthetic process	2.22297e-06	2.12193e-05	1.20544e-05	6
m14	BP	GO:0046697	decidualization	2.30205e-06	2.19137e-05	1.24489e-05	5
m14	BP	GO:0035821	modification of morphology or physiology of other organism	2.32409e-06	2.20212e-05	1.251e-05	10
m14	BP	GO:0001101	response to acid chemical	2.32605e-06	2.20212e-05	1.251e-05	14
m14	BP	GO:0050679	positive regulation of epithelial cell proliferation	2.39351e-06	2.25981e-05	1.28377e-05	11
m14	BP	GO:0043030	regulation of macrophage activation	2.44327e-06	2.30052e-05	1.3069e-05	7
m14	BP	GO:0030336	negative regulation of cell migration	2.4958e-06	2.34362e-05	1.33138e-05	14
m14	BP	GO:0009612	response to mechanical stimulus	2.51288e-06	2.35328e-05	1.33687e-05	11
m14	BP	GO:1904407	positive regulation of nitric oxide metabolic process	2.56387e-06	2.38812e-05	1.35666e-05	6
m14	BP	GO:1904646	cellular response to amyloid-beta	2.56387e-06	2.38812e-05	1.35666e-05	6
m14	BP	GO:0002200	somatic diversification of immune receptors	2.70735e-06	2.50828e-05	1.42492e-05	7
m14	BP	GO:0050918	positive chemotaxis	2.70735e-06	2.50828e-05	1.42492e-05	7
m14	BP	GO:0002695	negative regulation of leukocyte activation	2.74795e-06	2.53911e-05	1.44243e-05	10
m14	BP	GO:1903531	negative regulation of secretion by cell	2.76739e-06	2.55027e-05	1.44877e-05	11
m14	BP	GO:2000353	positive regulation of endothelial cell apoptotic process	2.8562e-06	2.62513e-05	1.4913e-05	5
m14	BP	GO:0002548	monocyte chemotaxis	2.9462e-06	2.70068e-05	1.53422e-05	6
m14	BP	GO:0045078	positive regulation of interferon-gamma biosynthetic process	3.24379e-06	2.95035e-05	1.67605e-05	4
m14	BP	GO:0045779	negative regulation of bone resorption	3.24379e-06	2.95035e-05	1.67605e-05	4
m14	BP	GO:0070482	response to oxygen levels	3.2441e-06	2.95035e-05	1.67605e-05	15
m14	BP	GO:0071675	regulation of mononuclear cell migration	3.3737e-06	3.06017e-05	1.73844e-05	6
m14	BP	GO:0042136	neurotransmitter biosynthetic process	3.40524e-06	3.08072e-05	1.75012e-05	8
m14	BP	GO:0010632	regulation of epithelial cell migration	3.44859e-06	3.11181e-05	1.76778e-05	13
m14	BP	GO:0002691	regulation of cellular extravasation	3.51001e-06	3.15901e-05	1.79459e-05	5
m14	BP	GO:2000107	negative regulation of leukocyte apoptotic process	3.85036e-06	3.45635e-05	1.9635e-05	6
m14	BP	GO:0018209	peptidyl-serine modification	3.89827e-06	3.49031e-05	1.9828e-05	12
m14	BP	GO:0050728	negative regulation of inflammatory response	4.00697e-06	3.57579e-05	2.03136e-05	10
m14	BP	GO:0002312	B cell activation involved in immune response	4.01438e-06	3.57579e-05	2.03136e-05	7
m14	BP	GO:0010951	negative regulation of endopeptidase activity	4.02566e-06	3.57664e-05	2.03184e-05	11
m14	BP	GO:2000146	negative regulation of cell motility	4.164e-06	3.67169e-05	2.08584e-05	14
m14	BP	GO:0030260	entry into host cell	4.18562e-06	3.67169e-05	2.08584e-05	9
m14	BP	GO:0044409	entry into host	4.18562e-06	3.67169e-05	2.08584e-05	9
m14	BP	GO:0051806	entry into cell of other organism involved in symbiotic interaction	4.18562e-06	3.67169e-05	2.08584e-05	9
m14	BP	GO:0051828	entry into other organism involved in symbiotic interaction	4.18562e-06	3.67169e-05	2.08584e-05	9
m14	BP	GO:0001961	positive regulation of cytokine-mediated signaling pathway	4.38039e-06	3.83284e-05	2.17739e-05	6
m14	BP	GO:0032963	collagen metabolic process	4.59981e-06	4.0147e-05	2.2807e-05	8
m14	BP	GO:0002829	negative regulation of type 2 immune response	4.65185e-06	4.02966e-05	2.2892e-05	4
m14	BP	GO:0032754	positive regulation of interleukin-5 production	4.65185e-06	4.02966e-05	2.2892e-05	4
m14	BP	GO:0045073	regulation of chemokine biosynthetic process	4.65185e-06	4.02966e-05	2.2892e-05	4
m14	BP	GO:0050769	positive regulation of neurogenesis	4.90508e-06	4.23843e-05	2.4078e-05	16
m14	BP	GO:0002686	negative regulation of leukocyte migration	4.96824e-06	4.28233e-05	2.43273e-05	6
m14	BP	GO:0051222	positive regulation of protein transport	4.98162e-06	4.2832e-05	2.43323e-05	15
m14	BP	GO:0007584	response to nutrient	5.04467e-06	4.32668e-05	2.45793e-05	11
m14	BP	GO:0051604	protein maturation	5.07066e-06	4.33823e-05	2.46449e-05	14
m14	BP	GO:0032481	positive regulation of type I interferon production	5.30796e-06	4.53007e-05	2.57347e-05	7
m14	BP	GO:0016447	somatic recombination of immunoglobulin gene segments	5.61861e-06	4.78341e-05	2.71739e-05	6
m14	BP	GO:0006909	phagocytosis	5.72116e-06	4.85878e-05	2.76021e-05	13
m14	BP	GO:0031100	animal organ regeneration	5.80941e-06	4.92167e-05	2.79593e-05	7
m14	BP	GO:0071214	cellular response to abiotic stimulus	6.13581e-06	5.17289e-05	2.93865e-05	13
m14	BP	GO:0104004	cellular response to environmental stimulus	6.13581e-06	5.17289e-05	2.93865e-05	13
m14	BP	GO:0019882	antigen processing and presentation	6.28231e-06	5.28354e-05	3.00151e-05	11
m14	BP	GO:0038061	NIK/NF-kappaB signaling	6.33996e-06	5.31437e-05	3.01903e-05	10
m14	BP	GO:0014015	positive regulation of gliogenesis	6.34964e-06	5.31437e-05	3.01903e-05	7
m14	BP	GO:0042033	chemokine biosynthetic process	6.46586e-06	5.37271e-05	3.05217e-05	4
m14	BP	GO:0046851	negative regulation of bone remodeling	6.46586e-06	5.37271e-05	3.05217e-05	4
m14	BP	GO:0050755	chemokine metabolic process	6.46586e-06	5.37271e-05	3.05217e-05	4
m14	BP	GO:0035690	cellular response to drug	6.76073e-06	5.60429e-05	3.18373e-05	14
m14	BP	GO:0032612	interleukin-1 production	7.04702e-06	5.82767e-05	3.31062e-05	8
m14	BP	GO:0010466	negative regulation of peptidase activity	7.14567e-06	5.89518e-05	3.34898e-05	11
m14	BP	GO:1901653	cellular response to peptide	7.19813e-06	5.92435e-05	3.36554e-05	14
m14	BP	GO:0043534	blood vessel endothelial cell migration	7.34311e-06	6.02936e-05	3.4252e-05	10
m14	BP	GO:0038111	interleukin-7-mediated signaling pathway	7.381e-06	6.04614e-05	3.43473e-05	5
m14	BP	GO:0051271	negative regulation of cellular component movement	7.4261e-06	6.06873e-05	3.44757e-05	14
m14	BP	GO:0042542	response to hydrogen peroxide	7.54224e-06	6.14579e-05	3.49134e-05	9
m14	BP	GO:0022617	extracellular matrix disassembly	7.55586e-06	6.14579e-05	3.49134e-05	7
m14	BP	GO:0002262	myeloid cell homeostasis	7.97862e-06	6.45792e-05	3.66866e-05	9
m14	BP	GO:0042133	neurotransmitter metabolic process	7.97862e-06	6.45792e-05	3.66866e-05	9
m14	BP	GO:0002720	positive regulation of cytokine production involved in immune response	7.99552e-06	6.45792e-05	3.66866e-05	6
m14	BP	GO:0051346	negative regulation of hydrolase activity	8.17812e-06	6.59005e-05	3.74372e-05	15
m14	BP	GO:0043154	negative regulation of cysteine-type endopeptidase activity involved in apoptotic process	8.22681e-06	6.6139e-05	3.75727e-05	7
m14	BP	GO:0002724	regulation of T cell cytokine production	8.73518e-06	6.98894e-05	3.97033e-05	5
m14	BP	GO:1902230	negative regulation of intrinsic apoptotic signaling pathway in response to DNA damage	8.73518e-06	6.98894e-05	3.97033e-05	5
m14	BP	GO:1990000	amyloid fibril formation	8.75383e-06	6.98894e-05	3.97033e-05	4
m14	BP	GO:0070374	positive regulation of ERK1 and ERK2 cascade	8.89234e-06	7.08321e-05	4.02388e-05	10
m14	BP	GO:0071902	positive regulation of protein serine/threonine kinase activity	9.2295e-06	7.33491e-05	4.16687e-05	13
m14	BP	GO:0043542	endothelial cell migration	9.4799e-06	7.51667e-05	4.27012e-05	12
m14	BP	GO:0060627	regulation of vesicle-mediated transport	9.60062e-06	7.59501e-05	4.31463e-05	16
m14	BP	GO:0018105	peptidyl-serine phosphorylation	9.97279e-06	7.86734e-05	4.46933e-05	11
m14	BP	GO:0001541	ovarian follicle development	9.99028e-06	7.86734e-05	4.46933e-05	6
m14	BP	GO:0033028	myeloid cell apoptotic process	1.02761e-05	8.07406e-05	4.58676e-05	5
m14	BP	GO:1901222	regulation of NIK/NF-kappaB signaling	1.05145e-05	8.24271e-05	4.68258e-05	8
m14	BP	GO:0040013	negative regulation of locomotion	1.07063e-05	8.37409e-05	4.75721e-05	14
m14	BP	GO:0016445	somatic diversification of immunoglobulins	1.11287e-05	8.68491e-05	4.93378e-05	6
m14	BP	GO:0002830	positive regulation of type 2 immune response	1.15881e-05	9.00284e-05	5.11439e-05	4
m14	BP	GO:0045072	regulation of interferon-gamma biosynthetic process	1.15881e-05	9.00284e-05	5.11439e-05	4
m14	BP	GO:0022612	gland morphogenesis	1.19504e-05	9.26355e-05	5.2625e-05	8
m14	BP	GO:0043032	positive regulation of macrophage activation	1.20213e-05	9.29775e-05	5.28193e-05	5
m14	BP	GO:0002768	immune response-regulating cell surface receptor signaling pathway	1.20672e-05	9.3124e-05	5.29025e-05	15
m14	BP	GO:0031348	negative regulation of defense response	1.26895e-05	9.77091e-05	5.55072e-05	11
m14	BP	GO:0002761	regulation of myeloid leukocyte differentiation	1.27281e-05	9.7789e-05	5.55527e-05	8
m14	BP	GO:0031099	regeneration	1.28543e-05	9.85403e-05	5.59794e-05	10
m14	BP	GO:0045862	positive regulation of proteolysis	1.31989e-05	0.000100958	5.7353e-05	13
m14	BP	GO:1903428	positive regulation of reactive oxygen species biosynthetic process	1.37205e-05	0.000104543	5.93893e-05	6
m14	BP	GO:0031334	positive regulation of protein complex assembly	1.37278e-05	0.000104543	5.93893e-05	11
m14	BP	GO:2000403	positive regulation of lymphocyte migration	1.39895e-05	0.000106302	6.03888e-05	5
m14	BP	GO:1904951	positive regulation of establishment of protein localization	1.41853e-05	0.000107554	6.11e-05	15
m14	BP	GO:0097237	cellular response to toxic substance	1.48392e-05	0.000112266	6.37768e-05	11
m14	BP	GO:0010744	positive regulation of macrophage derived foam cell differentiation	1.5045e-05	0.000113328	6.43801e-05	4
m14	BP	GO:0042095	interferon-gamma biosynthetic process	1.5045e-05	0.000113328	6.43801e-05	4
m14	BP	GO:0051101	regulation of DNA binding	1.53218e-05	0.000115162	6.54223e-05	8
m14	BP	GO:0072676	lymphocyte migration	1.55926e-05	0.000116441	6.61484e-05	7
m14	BP	GO:1903035	negative regulation of response to wounding	1.55926e-05	0.000116441	6.61484e-05	7
m14	BP	GO:2000117	negative regulation of cysteine-type endopeptidase activity	1.55926e-05	0.000116441	6.61484e-05	7
m14	BP	GO:0001893	maternal placenta development	1.62002e-05	0.000120459	6.8431e-05	5
m14	BP	GO:0048710	regulation of astrocyte differentiation	1.62002e-05	0.000120459	6.8431e-05	5
m14	BP	GO:0007254	JNK cascade	1.67477e-05	0.000123703	7.02742e-05	10
m14	BP	GO:0072678	T cell migration	1.67794e-05	0.000123703	7.02742e-05	6
m14	BP	GO:0090303	positive regulation of wound healing	1.67794e-05	0.000123703	7.02742e-05	6
m14	BP	GO:2000514	regulation of CD4-positive, alpha-beta T cell activation	1.67794e-05	0.000123703	7.02742e-05	6
m14	BP	GO:0010810	regulation of cell-substrate adhesion	1.74865e-05	0.000128643	7.30802e-05	10
m14	BP	GO:0048015	phosphatidylinositol-mediated signaling	1.76274e-05	0.000129404	7.35129e-05	9
m14	BP	GO:0050701	interleukin-1 secretion	1.85027e-05	0.000134855	7.66093e-05	6
m14	BP	GO:0050766	positive regulation of phagocytosis	1.85027e-05	0.000134855	7.66093e-05	6
m14	BP	GO:2000401	regulation of lymphocyte migration	1.85027e-05	0.000134855	7.66093e-05	6
m14	BP	GO:0003018	vascular process in circulatory system	1.85255e-05	0.000134855	7.66093e-05	9
m14	BP	GO:0002755	MyD88-dependent toll-like receptor signaling pathway	1.86738e-05	0.000135366	7.68994e-05	5
m14	BP	GO:0070670	response to interleukin-4	1.86738e-05	0.000135366	7.68994e-05	5
m14	BP	GO:0090026	positive regulation of monocyte chemotaxis	1.92049e-05	0.000138925	7.89213e-05	4
m14	BP	GO:0046330	positive regulation of JNK cascade	1.94597e-05	0.000140475	7.98019e-05	8
m14	BP	GO:0002753	cytoplasmic pattern recognition receptor signaling pathway	2.0366e-05	0.000146326	8.31258e-05	6
m14	BP	GO:0033627	cell adhesion mediated by integrin	2.0366e-05	0.000146326	8.31258e-05	6
m14	BP	GO:0048017	inositol lipid-mediated signaling	2.04392e-05	0.000146326	8.31258e-05	9
m14	BP	GO:2001242	regulation of intrinsic apoptotic signaling pathway	2.04392e-05	0.000146326	8.31258e-05	9
m14	BP	GO:0043406	positive regulation of MAP kinase activity	2.08635e-05	0.000149056	8.46766e-05	11
m14	BP	GO:0045124	regulation of bone resorption	2.14317e-05	0.0001528	8.68037e-05	5
m14	BP	GO:0051052	regulation of DNA metabolic process	2.25164e-05	0.000160204	9.10096e-05	14
m14	BP	GO:0043434	response to peptide hormone	2.31404e-05	0.000164306	9.33402e-05	14
m14	BP	GO:0002577	regulation of antigen processing and presentation	2.41519e-05	0.000170094	9.66282e-05	4
m14	BP	GO:0034104	negative regulation of tissue remodeling	2.41519e-05	0.000170094	9.66282e-05	4
m14	BP	GO:0051767	nitric-oxide synthase biosynthetic process	2.41519e-05	0.000170094	9.66282e-05	4
m14	BP	GO:0051769	regulation of nitric-oxide synthase biosynthetic process	2.41519e-05	0.000170094	9.66282e-05	4
m14	BP	GO:0032147	activation of protein kinase activity	2.48778e-05	0.000174851	9.93304e-05	12
m14	BP	GO:0001666	response to hypoxia	2.51029e-05	0.000175721	9.98245e-05	13
m14	BP	GO:0010631	epithelial cell migration	2.51029e-05	0.000175721	9.98245e-05	13
m14	BP	GO:2001243	negative regulation of intrinsic apoptotic signaling pathway	2.5881e-05	0.000180801	0.000102711	7
m14	BP	GO:0043254	regulation of protein complex assembly	2.64947e-05	0.000184717	0.000104935	14
m14	BP	GO:0051701	interaction with host	2.65563e-05	0.000184774	0.000104968	10
m14	BP	GO:0060135	maternal process involved in female pregnancy	2.68807e-05	0.000186656	0.000106037	6
m14	BP	GO:0022408	negative regulation of cell-cell adhesion	2.72202e-05	0.000188259	0.000106948	9
m14	BP	GO:0046328	regulation of JNK cascade	2.72202e-05	0.000188259	0.000106948	9
m14	BP	GO:0090132	epithelium migration	2.74075e-05	0.000189177	0.000107469	13
m14	BP	GO:0008585	female gonad development	2.77255e-05	0.000190613	0.000108285	7
m14	BP	GO:0033273	response to vitamin	2.77255e-05	0.000190613	0.000108285	7
m14	BP	GO:0042269	regulation of natural killer cell mediated cytotoxicity	2.78905e-05	0.00019099	0.000108499	5
m14	BP	GO:1902229	regulation of intrinsic apoptotic signaling pathway in response to DNA damage	2.78905e-05	0.00019099	0.000108499	5
m14	BP	GO:0032652	regulation of interleukin-1 production	2.96769e-05	0.000202822	0.00011522	7
m14	BP	GO:0016064	immunoglobulin mediated immune response	2.98675e-05	0.000203246	0.000115461	9
m14	BP	GO:0001894	tissue homeostasis	2.99623e-05	0.000203246	0.000115461	10
m14	BP	GO:0002374	cytokine secretion involved in immune response	2.99736e-05	0.000203246	0.000115461	4
m14	BP	GO:0032727	positive regulation of interferon-alpha production	2.99736e-05	0.000203246	0.000115461	4
m14	BP	GO:0051250	negative regulation of lymphocyte activation	3.05873e-05	0.000207002	0.000117595	8
m14	BP	GO:0001659	temperature homeostasis	3.12711e-05	0.000211217	0.00011999	9
m14	BP	GO:0001912	positive regulation of leukocyte mediated cytotoxicity	3.1639e-05	0.000212872	0.00012093	5
m14	BP	GO:0050832	defense response to fungus	3.1639e-05	0.000212872	0.00012093	5
m14	BP	GO:0050880	regulation of blood vessel size	3.2293e-05	0.000216851	0.00012319	8
m14	BP	GO:0090130	tissue migration	3.25785e-05	0.000218345	0.000124039	13
m14	BP	GO:0019724	B cell mediated immunity	3.27301e-05	0.000218938	0.000124376	9
m14	BP	GO:0035150	regulation of tube size	3.40776e-05	0.000227512	0.000129247	8
m14	BP	GO:0036293	response to decreased oxygen levels	3.44821e-05	0.00022977	0.000130529	13
m14	BP	GO:0042531	positive regulation of tyrosine phosphorylation of STAT protein	3.49748e-05	0.000232606	0.00013214	6
m14	BP	GO:0010876	lipid localization	3.54699e-05	0.000235447	0.000133754	13
m14	BP	GO:0014002	astrocyte development	3.57666e-05	0.000235611	0.000133847	5
m14	BP	GO:0098760	response to interleukin-7	3.57666e-05	0.000235611	0.000133847	5
m14	BP	GO:0098761	cellular response to interleukin-7	3.57666e-05	0.000235611	0.000133847	5
m14	BP	GO:2000404	regulation of T cell migration	3.57666e-05	0.000235611	0.000133847	5
m14	BP	GO:0006925	inflammatory cell apoptotic process	3.6761e-05	0.000241702	0.000137308	4
m14	BP	GO:0048732	gland development	3.7297e-05	0.000244762	0.000139046	14
m14	BP	GO:0071900	regulation of protein serine/threonine kinase activity	3.79581e-05	0.000248629	0.000141243	15
m14	BP	GO:0046545	development of primary female sexual characteristics	3.86486e-05	0.000252199	0.000143271	7
m14	BP	GO:0097530	granulocyte migration	3.86486e-05	0.000252199	0.000143271	7
m14	BP	GO:0001953	negative regulation of cell-matrix adhesion	4.02995e-05	0.000261985	0.00014883	5
m14	BP	GO:0002715	regulation of natural killer cell mediated immunity	4.02995e-05	0.000261985	0.00014883	5
m14	BP	GO:0070498	interleukin-1-mediated signaling pathway	4.12086e-05	0.000267393	0.000151902	7
m14	BP	GO:0014065	phosphatidylinositol 3-kinase signaling	4.20632e-05	0.00027192	0.000154474	8
m14	BP	GO:0030879	mammary gland development	4.20632e-05	0.00027192	0.000154474	8
m14	BP	GO:0070372	regulation of ERK1 and ERK2 cascade	4.36881e-05	0.000281898	0.000160143	11
m14	BP	GO:0010952	positive regulation of peptidase activity	4.46519e-05	0.000287582	0.000163371	9
m14	BP	GO:0051099	positive regulation of binding	4.66224e-05	0.000299715	0.000170264	9
m14	BP	GO:1903036	positive regulation of response to wounding	4.86936e-05	0.000312451	0.000177499	6
m14	BP	GO:0050868	negative regulation of T cell activation	4.97364e-05	0.000318552	0.000180965	7
m14	BP	GO:0032677	regulation of interleukin-8 production	5.27192e-05	0.000337033	0.000191464	6
m14	BP	GO:0034123	positive regulation of toll-like receptor signaling pathway	5.36131e-05	0.000341488	0.000193995	4
m14	BP	GO:0071677	positive regulation of mononuclear cell migration	5.36131e-05	0.000341488	0.000193995	4
m14	BP	GO:0046850	regulation of bone remodeling	5.66048e-05	0.000359882	0.000204444	5
m14	BP	GO:0043627	response to estrogen	5.70066e-05	0.000361111	0.000205143	6
m14	BP	GO:0061045	negative regulation of wound healing	5.70066e-05	0.000361111	0.000205143	6
m14	BP	GO:0097305	response to alcohol	5.9316e-05	0.000375055	0.000213064	10
m14	BP	GO:0090066	regulation of anatomical structure size	6.14692e-05	0.000387961	0.000220396	14
m14	BP	GO:0032757	positive regulation of interleukin-8 production	6.30382e-05	0.000394273	0.000223982	5
m14	BP	GO:0045687	positive regulation of glial cell differentiation	6.30382e-05	0.000394273	0.000223982	5
m14	BP	GO:0071354	cellular response to interleukin-6	6.30382e-05	0.000394273	0.000223982	5
m14	BP	GO:0090199	regulation of release of cytochrome c from mitochondria	6.30382e-05	0.000394273	0.000223982	5
m14	BP	GO:1904036	negative regulation of epithelial cell apoptotic process	6.30382e-05	0.000394273	0.000223982	5
m14	BP	GO:0045954	positive regulation of natural killer cell mediated cytotoxicity	6.38753e-05	0.000397357	0.000225733	4
m14	BP	GO:0048143	astrocyte activation	6.38753e-05	0.000397357	0.000225733	4
m14	BP	GO:1901889	negative regulation of cell junction assembly	6.38753e-05	0.000397357	0.000225733	4
m14	BP	GO:0010038	response to metal ion	6.5826e-05	0.00040827	0.000231933	12
m14	BP	GO:0071236	cellular response to antibiotic	6.58652e-05	0.00040827	0.000231933	8
m14	BP	GO:0001667	ameboidal-type cell migration	6.76825e-05	0.000418786	0.000237907	14
m14	BP	GO:0002204	somatic recombination of immunoglobulin genes involved in immune response	7.00213e-05	0.000430948	0.000244816	5
m14	BP	GO:0002208	somatic diversification of immunoglobulins involved in immune response	7.00213e-05	0.000430948	0.000244816	5
m14	BP	GO:0045190	isotype switching	7.00213e-05	0.000430948	0.000244816	5
m14	BP	GO:0072503	cellular divalent inorganic cation homeostasis	7.14759e-05	0.000439121	0.000249459	13
m14	BP	GO:0021782	glial cell development	7.53531e-05	0.000458145	0.000260266	7
m14	BP	GO:0002719	negative regulation of cytokine production involved in immune response	7.5498e-05	0.000458145	0.000260266	4
m14	BP	GO:0032461	positive regulation of protein oligomerization	7.5498e-05	0.000458145	0.000260266	4
m14	BP	GO:0042730	fibrinolysis	7.5498e-05	0.000458145	0.000260266	4
m14	BP	GO:0060330	regulation of response to interferon-gamma	7.5498e-05	0.000458145	0.000260266	4
m14	BP	GO:0060334	regulation of interferon-gamma-mediated signaling pathway	7.5498e-05	0.000458145	0.000260266	4
m14	BP	GO:0090025	regulation of monocyte chemotaxis	7.5498e-05	0.000458145	0.000260266	4
m14	BP	GO:0034644	cellular response to UV	7.70275e-05	0.000464983	0.000264151	6
m14	BP	GO:0051851	modification by host of symbiont morphology or physiology	7.70275e-05	0.000464983	0.000264151	6
m14	BP	GO:0071260	cellular response to mechanical stimulus	7.70275e-05	0.000464983	0.000264151	6
m14	BP	GO:0070371	ERK1 and ERK2 cascade	7.79047e-05	0.000469461	0.000266695	11
m14	BP	GO:0030168	platelet activation	8.3336e-05	0.000501318	0.000284792	8
m14	BP	GO:0051817	modification of morphology or physiology of other organism involved in symbiotic interaction	8.43781e-05	0.000506707	0.000287854	7
m14	BP	GO:0030195	negative regulation of blood coagulation	8.57637e-05	0.000514137	0.000292075	5
m14	BP	GO:0032070	regulation of deoxyribonuclease activity	8.78206e-05	0.000523749	0.000297535	3
m14	BP	GO:0045080	positive regulation of chemokine biosynthetic process	8.78206e-05	0.000523749	0.000297535	3
m14	BP	GO:0045351	type I interferon biosynthetic process	8.78206e-05	0.000523749	0.000297535	3
m14	BP	GO:0032647	regulation of interferon-alpha production	8.85867e-05	0.000527411	0.000299615	4
m14	BP	GO:0042509	regulation of tyrosine phosphorylation of STAT protein	8.89475e-05	0.000527745	0.000299805	6
m14	BP	GO:0097756	negative regulation of blood vessel diameter	8.89475e-05	0.000527745	0.000299805	6
m14	BP	GO:0046660	female sex differentiation	8.92103e-05	0.000528399	0.000300177	7
m14	BP	GO:0031343	positive regulation of cell killing	9.4589e-05	0.000557399	0.000316651	5
m14	BP	GO:0070741	response to interleukin-6	9.4589e-05	0.000557399	0.000316651	5
m14	BP	GO:1900047	negative regulation of hemostasis	9.4589e-05	0.000557399	0.000316651	5
m14	BP	GO:0032637	interleukin-8 production	9.54341e-05	0.000560205	0.000318245	6
m14	BP	GO:0110110	positive regulation of animal organ morphogenesis	9.54341e-05	0.000560205	0.000318245	6
m14	BP	GO:0031960	response to corticosteroid	9.55501e-05	0.000560205	0.000318245	8
m14	BP	GO:0014068	positive regulation of phosphatidylinositol 3-kinase signaling	0.000102291	0.0005967	0.000338977	6
m14	BP	GO:0046849	bone remodeling	0.000102291	0.0005967	0.000338977	6
m14	BP	GO:0051702	interaction with symbiont	0.000102291	0.0005967	0.000338977	6
m14	BP	GO:0001782	B cell homeostasis	0.00010325	0.000601277	0.000341577	4
m14	BP	GO:0001954	positive regulation of cell-matrix adhesion	0.000104096	0.000604174	0.000343223	5
m14	BP	GO:0009620	response to fungus	0.000104096	0.000604174	0.000343223	5
m14	BP	GO:0043900	regulation of multi-organism process	0.000106771	0.000618668	0.000351457	13
m14	BP	GO:0016049	cell growth	0.000107695	0.000621941	0.000353316	14
m14	BP	GO:0031667	response to nutrient levels	0.000107695	0.000621941	0.000353316	14
m14	BP	GO:0007260	tyrosine phosphorylation of STAT protein	0.000109535	0.00063151	0.000358753	6
m14	BP	GO:0006875	cellular metal ion homeostasis	0.000110147	0.000633985	0.000360158	14
m14	BP	GO:0043280	positive regulation of cysteine-type endopeptidase activity involved in apoptotic process	0.000110849	0.00063697	0.000361854	7
m14	BP	GO:0050704	regulation of interleukin-1 secretion	0.000114319	0.000655821	0.000372563	5
m14	BP	GO:0072507	divalent inorganic cation homeostasis	0.000117653	0.000673833	0.000382796	13
m14	BP	GO:0002717	positive regulation of natural killer cell mediated immunity	0.000119597	0.000679052	0.000385761	4
m14	BP	GO:0032607	interferon-alpha production	0.000119597	0.000679052	0.000385761	4
m14	BP	GO:2000406	positive regulation of T cell migration	0.000119597	0.000679052	0.000385761	4
m14	BP	GO:0002604	regulation of dendritic cell antigen processing and presentation	0.000119936	0.000679052	0.000385761	3
m14	BP	GO:0002638	negative regulation of immunoglobulin production	0.000119936	0.000679052	0.000385761	3
m14	BP	GO:0070106	interleukin-27-mediated signaling pathway	0.000119936	0.000679052	0.000385761	3
m14	BP	GO:0070673	response to interleukin-18	0.000119936	0.000679052	0.000385761	3
m14	BP	GO:0010950	positive regulation of endopeptidase activity	0.000124451	0.000703461	0.000399627	8
m14	BP	GO:0000018	regulation of DNA recombination	0.000125242	0.000703644	0.000399731	6
m14	BP	GO:0071621	granulocyte chemotaxis	0.000125242	0.000703644	0.000399731	6
m14	BP	GO:0019229	regulation of vasoconstriction	0.000125295	0.000703644	0.000399731	5
m14	BP	GO:0050819	negative regulation of coagulation	0.000125295	0.000703644	0.000399731	5
m14	BP	GO:0019932	second-messenger-mediated signaling	0.000129942	0.000728561	0.000413886	12
m14	BP	GO:0070542	response to fatty acid	0.000133738	0.000748631	0.000425287	6
m14	BP	GO:0034103	regulation of tissue remodeling	0.000142685	0.000797424	0.000453006	6
m14	BP	GO:0034614	cellular response to reactive oxygen species	0.000147464	0.000822804	0.000467424	8
m14	BP	GO:0002381	immunoglobulin production involved in immunoglobulin mediated immune response	0.000149654	0.000828358	0.000470579	5
m14	BP	GO:0010332	response to gamma radiation	0.000149654	0.000828358	0.000470579	5
m14	BP	GO:0031295	T cell costimulation	0.000149654	0.000828358	0.000470579	5
m14	BP	GO:0061844	antimicrobial humoral immune response mediated by antimicrobial peptide	0.000149654	0.000828358	0.000470579	5
m14	BP	GO:0098586	cellular response to virus	0.000149654	0.000828358	0.000470579	5
m14	BP	GO:0002002	regulation of angiotensin levels in blood	0.000158834	0.000865629	0.000491752	3
m14	BP	GO:0002003	angiotensin maturation	0.000158834	0.000865629	0.000491752	3
m14	BP	GO:0002468	dendritic cell antigen processing and presentation	0.000158834	0.000865629	0.000491752	3
m14	BP	GO:0016045	detection of bacterium	0.000158834	0.000865629	0.000491752	3
m14	BP	GO:0033197	response to vitamin E	0.000158834	0.000865629	0.000491752	3
m14	BP	GO:0038110	interleukin-2-mediated signaling pathway	0.000158834	0.000865629	0.000491752	3
m14	BP	GO:0071888	macrophage apoptotic process	0.000158834	0.000865629	0.000491752	3
m14	BP	GO:2001198	regulation of dendritic cell differentiation	0.000158834	0.000865629	0.000491752	3
m14	BP	GO:0035296	regulation of tube diameter	0.000158886	0.000865629	0.000491752	7
m14	BP	GO:0097746	regulation of blood vessel diameter	0.000158886	0.000865629	0.000491752	7
m14	BP	GO:0031294	lymphocyte costimulation	0.000163114	0.000887266	0.000504044	5
m14	BP	GO:0008217	regulation of blood pressure	0.000173877	0.000942856	0.000535624	8
m14	BP	GO:0030324	lung development	0.000173877	0.000942856	0.000535624	8
m14	BP	GO:0001836	release of cytochrome c from mitochondria	0.000177478	0.00095938	0.000545011	5
m14	BP	GO:0045453	bone resorption	0.000177478	0.00095938	0.000545011	5
m14	BP	GO:0015908	fatty acid transport	0.000183323	0.000986356	0.000560336	6
m14	BP	GO:0045639	positive regulation of myeloid cell differentiation	0.000183323	0.000986356	0.000560336	6
m14	BP	GO:1901888	regulation of cell junction assembly	0.000183323	0.000986356	0.000560336	6
m14	BP	GO:0043393	regulation of protein binding	0.000186314	0.0010009	0.000568597	9
m14	BP	GO:0006874	cellular calcium ion homeostasis	0.000189793	0.00101801	0.000578317	12
m14	BP	GO:0071496	cellular response to external stimulus	0.00019074	0.0010215	0.000580304	11
m14	BP	GO:0043491	protein kinase B signaling	0.000194313	0.00103904	0.000590263	10
m14	BP	GO:0009314	response to radiation	0.00020075	0.0010718	0.000608876	13
m14	BP	GO:0043405	regulation of MAP kinase activity	0.000201298	0.00107307	0.000609598	11
m14	BP	GO:0030323	respiratory tube development	0.000204067	0.00107835	0.000612596	8
m14	BP	GO:0051897	positive regulation of protein kinase B signaling	0.000204067	0.00107835	0.000612596	8
m14	BP	GO:0016486	peptide hormone processing	0.000204108	0.00107835	0.000612596	4
m14	BP	GO:0032633	interleukin-4 production	0.000204108	0.00107835	0.000612596	4
m14	BP	GO:0051917	regulation of fibrinolysis	0.000205089	0.00107835	0.000612596	3
m14	BP	GO:0060397	JAK-STAT cascade involved in growth hormone signaling pathway	0.000205089	0.00107835	0.000612596	3
m14	BP	GO:0061888	regulation of astrocyte activation	0.000205089	0.00107835	0.000612596	3
m14	BP	GO:0071352	cellular response to interleukin-2	0.000205089	0.00107835	0.000612596	3
m14	BP	GO:0098543	detection of other organism	0.000205089	0.00107835	0.000612596	3
m14	BP	GO:0042267	natural killer cell mediated cytotoxicity	0.000209086	0.0010977	0.00062359	5
m14	BP	GO:0009991	response to extracellular stimulus	0.000214476	0.00112429	0.000638696	14
m14	BP	GO:0032611	interleukin-1 beta production	0.000219403	0.00114838	0.000652382	6
m14	BP	GO:0002260	lymphocyte homeostasis	0.000226412	0.00118328	0.000672207	5
m14	BP	GO:0045191	regulation of isotype switching	0.000230603	0.00119796	0.000680545	4
m14	BP	GO:0071353	cellular response to interleukin-4	0.000230603	0.00119796	0.000680545	4
m14	BP	GO:0097242	amyloid-beta clearance	0.000230603	0.00119796	0.000680545	4
m14	BP	GO:2000352	negative regulation of endothelial cell apoptotic process	0.000230603	0.00119796	0.000680545	4
m14	BP	GO:0007229	integrin-mediated signaling pathway	0.000232597	0.00120651	0.000685404	6
m14	BP	GO:0043388	positive regulation of DNA binding	0.000244809	0.00126795	0.000720308	5
m14	BP	GO:0061138	morphogenesis of a branching epithelium	0.000247731	0.00128118	0.000727819	8
m14	BP	GO:2001056	positive regulation of cysteine-type endopeptidase activity	0.00025547	0.00131923	0.000749438	7
m14	BP	GO:0002834	regulation of response to tumor cell	0.000259259	0.00132223	0.000751139	3
m14	BP	GO:0002837	regulation of immune response to tumor cell	0.000259259	0.00132223	0.000751139	3
m14	BP	GO:0044146	negative regulation of growth of symbiont involved in interaction with host	0.000259259	0.00132223	0.000751139	3
m14	BP	GO:0045651	positive regulation of macrophage differentiation	0.000259259	0.00132223	0.000751139	3
m14	BP	GO:0051770	positive regulation of nitric-oxide synthase biosynthetic process	0.000259259	0.00132223	0.000751139	3
m14	BP	GO:0070669	response to interleukin-2	0.000259259	0.00132223	0.000751139	3
m14	BP	GO:0090399	replicative senescence	0.000259259	0.00132223	0.000751139	3
m14	BP	GO:0055074	calcium ion homeostasis	0.000259363	0.00132223	0.000751139	12
m14	BP	GO:0032660	regulation of interleukin-17 production	0.000259484	0.00132223	0.000751139	4
m14	BP	GO:0032623	interleukin-2 production	0.00026432	0.00134489	0.000764013	5
m14	BP	GO:0009411	response to UV	0.000279518	0.00141805	0.000805577	7
m14	BP	GO:0050709	negative regulation of protein secretion	0.000279518	0.00141805	0.000805577	7
m14	BP	GO:0002228	natural killer cell mediated immunity	0.00028499	0.00143949	0.000817756	5
m14	BP	GO:0030101	natural killer cell activation	0.00028499	0.00143949	0.000817756	5
m14	BP	GO:0046637	regulation of alpha-beta T cell differentiation	0.00028499	0.00143949	0.000817756	5
m14	BP	GO:0043901	negative regulation of multi-organism process	0.00028793	0.00145222	0.000824989	8
m14	BP	GO:0007157	heterophilic cell-cell adhesion via plasma membrane cell adhesion molecules	0.000290876	0.00145648	0.000827408	4
m14	BP	GO:0030224	monocyte differentiation	0.000290876	0.00145648	0.000827408	4
m14	BP	GO:0070423	nucleotide-binding oligomerization domain containing signaling pathway	0.000290876	0.00145648	0.000827408	4
m14	BP	GO:0071402	cellular response to lipoprotein particle stimulus	0.000290876	0.00145648	0.000827408	4
m14	BP	GO:1903131	mononuclear cell differentiation	0.000290876	0.00145648	0.000827408	4
m14	BP	GO:0051384	response to glucocorticoid	0.000305354	0.00152677	0.000867337	7
m14	BP	GO:0015909	long-chain fatty acid transport	0.000306864	0.00152771	0.00086787	5
m14	BP	GO:0019915	lipid storage	0.000306864	0.00152771	0.00086787	5
m14	BP	GO:0045670	regulation of osteoclast differentiation	0.000306864	0.00152771	0.00086787	5
m14	BP	GO:0070301	cellular response to hydrogen peroxide	0.000308236	0.00153233	0.000870499	6
m14	BP	GO:0001558	regulation of cell growth	0.000312145	0.00154955	0.000880277	12
m14	BP	GO:0032736	positive regulation of interleukin-13 production	0.000321885	0.00159106	0.000903858	3
m14	BP	GO:0044144	modulation of growth of symbiont involved in interaction with host	0.000321885	0.00159106	0.000903858	3
m14	BP	GO:0090197	positive regulation of chemokine secretion	0.000321885	0.00159106	0.000903858	3
m14	BP	GO:0035872	nucleotide-binding domain, leucine rich repeat containing receptor signaling pathway	0.000324901	0.00159912	0.000908441	4
m14	BP	GO:1905521	regulation of macrophage migration	0.000324901	0.00159912	0.000908441	4
m14	BP	GO:2000516	positive regulation of CD4-positive, alpha-beta T cell activation	0.000324901	0.00159912	0.000908441	4
m14	BP	GO:0002429	immune response-activating cell surface receptor signaling pathway	0.000334162	0.00164237	0.000933011	12
m14	BP	GO:0048661	positive regulation of smooth muscle cell proliferation	0.000343395	0.00168536	0.000957431	6
m14	BP	GO:0002792	negative regulation of peptide secretion	0.000347671	0.00170393	0.000967981	7
m14	BP	GO:0001990	regulation of systemic arterial blood pressure by hormone	0.000361685	0.00176017	0.000999929	4
m14	BP	GO:0010955	negative regulation of protein processing	0.000361685	0.00176017	0.000999929	4
m14	BP	GO:0030574	collagen catabolic process	0.000361685	0.00176017	0.000999929	4
m14	BP	GO:0046006	regulation of activated T cell proliferation	0.000361685	0.00176017	0.000999929	4
m14	BP	GO:1903318	negative regulation of protein maturation	0.000361685	0.00176017	0.000999929	4
m14	BP	GO:0106106	cold-induced thermogenesis	0.000362777	0.00176053	0.00100014	7
m14	BP	GO:0120161	regulation of cold-induced thermogenesis	0.000362777	0.00176053	0.00100014	7
m14	BP	GO:0051224	negative regulation of protein transport	0.000371046	0.00179815	0.0010215	8
m14	BP	GO:0010212	response to ionizing radiation	0.000378404	0.00183124	0.0010403	7
m14	BP	GO:0010812	negative regulation of cell-substrate adhesion	0.000380165	0.00183464	0.00104224	5
m14	BP	GO:0040014	regulation of multicellular organism growth	0.000380165	0.00183464	0.00104224	5
m14	BP	GO:0002295	T-helper cell lineage commitment	0.000393492	0.00189368	0.00107577	3
m14	BP	GO:0031643	positive regulation of myelination	0.000393492	0.00189368	0.00107577	3
m14	BP	GO:0002711	positive regulation of T cell mediated immunity	0.000401355	0.00192351	0.00109272	4
m14	BP	GO:0032620	interleukin-17 production	0.000401355	0.00192351	0.00109272	4
m14	BP	GO:0043277	apoptotic cell clearance	0.000401355	0.00192351	0.00109272	4
m14	BP	GO:1903524	positive regulation of blood circulation	0.000407316	0.00194938	0.00110742	5
m14	BP	GO:0001763	morphogenesis of a branching structure	0.00041219	0.00196998	0.00111912	8
m14	BP	GO:0060541	respiratory system development	0.000426701	0.00203373	0.00115533	8
m14	BP	GO:1904950	negative regulation of establishment of protein localization	0.000426701	0.00203373	0.00115533	8
m14	BP	GO:0034599	cellular response to oxidative stress	0.000428338	0.00203873	0.00115817	10
m14	BP	GO:0048662	negative regulation of smooth muscle cell proliferation	0.000435904	0.00207189	0.00117701	5
m14	BP	GO:0006310	DNA recombination	0.000441932	0.00209766	0.00119165	9
m14	BP	GO:0060249	anatomical structure homeostasis	0.000455168	0.00215753	0.00122567	12
m14	BP	GO:0002418	immune response to tumor cell	0.000474587	0.00223127	0.00126755	3
m14	BP	GO:0002902	regulation of B cell apoptotic process	0.000474587	0.00223127	0.00126755	3
m14	BP	GO:0010224	response to UV-B	0.000474587	0.00223127	0.00126755	3
m14	BP	GO:0043373	CD4-positive, alpha-beta T cell lineage commitment	0.000474587	0.00223127	0.00126755	3
m14	BP	GO:0044110	growth involved in symbiotic interaction	0.000474587	0.00223127	0.00126755	3
m14	BP	GO:0044116	growth of symbiont involved in interaction with host	0.000474587	0.00223127	0.00126755	3
m14	BP	GO:0007611	learning or memory	0.000482798	0.0022668	0.00128774	9
m14	BP	GO:0006898	receptor-mediated endocytosis	0.000488251	0.00228929	0.00130052	10
m14	BP	GO:0050435	amyloid-beta metabolic process	0.000489858	0.00229373	0.00130304	4
m14	BP	GO:0042310	vasoconstriction	0.000497593	0.0023268	0.00132183	5
m14	BP	GO:1905952	regulation of lipid localization	0.000503514	0.00235132	0.00133575	7
m14	BP	GO:1903707	negative regulation of hemopoiesis	0.000523799	0.00243947	0.00138583	7
m14	BP	GO:1990845	adaptive thermogenesis	0.000523799	0.00243947	0.00138583	7
m14	BP	GO:0031641	regulation of myelination	0.000538949	0.0025033	0.00142209	4
m14	BP	GO:0050798	activated T cell proliferation	0.000538949	0.0025033	0.00142209	4
m14	BP	GO:0010811	positive regulation of cell-substrate adhesion	0.000542249	0.00251525	0.00142888	6
m14	BP	GO:0010888	negative regulation of lipid storage	0.000565664	0.00261337	0.00148462	3
m14	BP	GO:0090196	regulation of chemokine secretion	0.000565664	0.00261337	0.00148462	3
m14	BP	GO:0098581	detection of external biotic stimulus	0.000565664	0.00261337	0.00148462	3
m14	BP	GO:1900271	regulation of long-term synaptic potentiation	0.000591439	0.00272881	0.0015502	4
m14	BP	GO:0071482	cellular response to light stimulus	0.000625341	0.00288139	0.00163688	6
m14	BP	GO:0006919	activation of cysteine-type endopeptidase activity involved in apoptotic process	0.000640423	0.00294697	0.00167413	5
m14	BP	GO:0003044	regulation of systemic arterial blood pressure mediated by a chemical signal	0.000647457	0.00296359	0.00168358	4
m14	BP	GO:0010883	regulation of lipid storage	0.000647457	0.00296359	0.00168358	4
m14	BP	GO:0060443	mammary gland morphogenesis	0.000647457	0.00296359	0.00168358	4
m14	BP	GO:0097028	dendritic cell differentiation	0.000647457	0.00296359	0.00168358	4
m14	BP	GO:0015711	organic anion transport	0.000650027	0.00297143	0.00168803	12
m14	BP	GO:0001991	regulation of systemic arterial blood pressure by circulatory renin-angiotensin	0.000667197	0.00302597	0.00171901	3
m14	BP	GO:0002363	alpha-beta T cell lineage commitment	0.000667197	0.00302597	0.00171901	3
m14	BP	GO:0002544	chronic inflammatory response	0.000667197	0.00302597	0.00171901	3
m14	BP	GO:0002726	positive regulation of T cell cytokine production	0.000667197	0.00302597	0.00171901	3
m14	BP	GO:0032069	regulation of nuclease activity	0.000667197	0.00302597	0.00171901	3
m14	BP	GO:0090201	negative regulation of release of cytochrome c from mitochondria	0.000667197	0.00302597	0.00171901	3
m14	BP	GO:0010043	response to zinc ion	0.000707133	0.00319872	0.00181715	4
m14	BP	GO:0032459	regulation of protein oligomerization	0.000707133	0.00319872	0.00181715	4
m14	BP	GO:0007569	cell aging	0.000717987	0.00324358	0.00184264	6
m14	BP	GO:0014066	regulation of phosphatidylinositol 3-kinase signaling	0.000751118	0.00338442	0.00192265	6
m14	BP	GO:1900180	regulation of protein localization to nucleus	0.000751118	0.00338442	0.00192265	6
m14	BP	GO:0001974	blood vessel remodeling	0.0007706	0.00345871	0.00196485	4
m14	BP	GO:0045058	T cell selection	0.0007706	0.00345871	0.00196485	4
m14	BP	GO:0045581	negative regulation of T cell differentiation	0.0007706	0.00345871	0.00196485	4
m14	BP	GO:0010042	response to manganese ion	0.000779649	0.00347681	0.00197513	3
m14	BP	GO:0043369	CD4-positive or CD8-positive, alpha-beta T cell lineage commitment	0.000779649	0.00347681	0.00197513	3
m14	BP	GO:0043371	negative regulation of CD4-positive, alpha-beta T cell differentiation	0.000779649	0.00347681	0.00197513	3
m14	BP	GO:0090195	chemokine secretion	0.000779649	0.00347681	0.00197513	3
m14	BP	GO:1905523	positive regulation of macrophage migration	0.000779649	0.00347681	0.00197513	3
m14	BP	GO:2001021	negative regulation of response to DNA damage stimulus	0.000811957	0.00361623	0.00205433	5
m14	BP	GO:0045927	positive regulation of growth	0.000819991	0.00364733	0.002072	9
m14	BP	GO:0032480	negative regulation of type I interferon production	0.000837986	0.00371783	0.00211205	4
m14	BP	GO:1900015	regulation of cytokine production involved in inflammatory response	0.000837986	0.00371783	0.00211205	4
m14	BP	GO:0019058	viral life cycle	0.000860849	0.00381438	0.0021669	10
m14	BP	GO:0048638	regulation of developmental growth	0.000881255	0.00389981	0.00221543	10
m14	BP	GO:0030307	positive regulation of cell growth	0.000882542	0.00390052	0.00221584	7
m14	BP	GO:0032469	endoplasmic reticulum calcium ion homeostasis	0.000903463	0.00397776	0.00225972	3
m14	BP	GO:0050765	negative regulation of phagocytosis	0.000903463	0.00397776	0.00225972	3
m14	BP	GO:0060396	growth hormone receptor signaling pathway	0.000903463	0.00397776	0.00225972	3
m14	BP	GO:0043370	regulation of CD4-positive, alpha-beta T cell differentiation	0.000909425	0.00399386	0.00226886	4
m14	BP	GO:0044764	multi-organism cellular process	0.000909425	0.00399386	0.00226886	4
m14	BP	GO:0008406	gonad development	0.000920354	0.00403674	0.00229322	8
m14	BP	GO:0042552	myelination	0.000934877	0.00409526	0.00232646	6
m14	BP	GO:0030522	intracellular receptor signaling pathway	0.000959507	0.00419599	0.00238369	9
m14	BP	GO:0006970	response to osmotic stress	0.000961505	0.00419599	0.00238369	5
m14	BP	GO:0032651	regulation of interleukin-1 beta production	0.000961505	0.00419599	0.00238369	5
m14	BP	GO:0002704	negative regulation of leukocyte mediated immunity	0.000985047	0.00428254	0.00243286	4
m14	BP	GO:0101023	vascular endothelial cell proliferation	0.000985047	0.00428254	0.00243286	4
m14	BP	GO:1905562	regulation of vascular endothelial cell proliferation	0.000985047	0.00428254	0.00243286	4
m14	BP	GO:0006869	lipid transport	0.00103552	0.00445592	0.00253135	10
m14	BP	GO:0006309	apoptotic DNA fragmentation	0.00103907	0.00445592	0.00253135	3
m14	BP	GO:0009595	detection of biotic stimulus	0.00103907	0.00445592	0.00253135	3
m14	BP	GO:0032656	regulation of interleukin-13 production	0.00103907	0.00445592	0.00253135	3
m14	BP	GO:0033622	integrin activation	0.00103907	0.00445592	0.00253135	3
m14	BP	GO:0035584	calcium-mediated signaling using intracellular calcium source	0.00103907	0.00445592	0.00253135	3
m14	BP	GO:0042094	interleukin-2 biosynthetic process	0.00103907	0.00445592	0.00253135	3
m14	BP	GO:0045649	regulation of macrophage differentiation	0.00103907	0.00445592	0.00253135	3
m14	BP	GO:0048714	positive regulation of oligodendrocyte differentiation	0.00103907	0.00445592	0.00253135	3
m14	BP	GO:0071359	cellular response to dsRNA	0.00103907	0.00445592	0.00253135	3
m14	BP	GO:0071378	cellular response to growth hormone stimulus	0.00103907	0.00445592	0.00253135	3
m14	BP	GO:0001822	kidney development	0.0010628	0.00455014	0.00258488	9
m14	BP	GO:0002534	cytokine production involved in inflammatory response	0.00106498	0.00455014	0.00258488	4
m14	BP	GO:0048260	positive regulation of receptor-mediated endocytosis	0.00106498	0.00455014	0.00258488	4
m14	BP	GO:0034504	protein localization to nucleus	0.00109686	0.00467481	0.0026557	8
m14	BP	GO:0045137	development of primary sexual characteristics	0.00109686	0.00467481	0.0026557	8
m14	BP	GO:0007272	ensheathment of neurons	0.00110533	0.0046936	0.00266638	6
m14	BP	GO:0008366	axon ensheathment	0.00110533	0.0046936	0.00266638	6
m14	BP	GO:0042476	odontogenesis	0.00110533	0.0046936	0.00266638	6
m14	BP	GO:0070613	regulation of protein processing	0.00112297	0.00475684	0.0027023	7
m14	BP	GO:0071478	cellular response to radiation	0.00112297	0.00475684	0.0027023	7
m14	BP	GO:0050851	antigen receptor-mediated signaling pathway	0.00112874	0.00477545	0.00271287	8
m14	BP	GO:0042475	odontogenesis of dentin-containing tooth	0.00113062	0.00477757	0.00271407	5
m14	BP	GO:0014009	glial cell proliferation	0.00114937	0.00483906	0.00274901	4
m14	BP	GO:0032732	positive regulation of interleukin-1 production	0.00114937	0.00483906	0.00274901	4
m14	BP	GO:1905517	macrophage migration	0.00114937	0.00483906	0.00274901	4
m14	BP	GO:0045471	response to ethanol	0.00115145	0.00484196	0.00275065	6
m14	BP	GO:0001783	B cell apoptotic process	0.00118689	0.00495491	0.00281482	3
m14	BP	GO:0002347	response to tumor cell	0.00118689	0.00495491	0.00281482	3
m14	BP	GO:0010288	response to lead ion	0.00118689	0.00495491	0.00281482	3
m14	BP	GO:0032753	positive regulation of interleukin-4 production	0.00118689	0.00495491	0.00281482	3
m14	BP	GO:0071404	cellular response to low-density lipoprotein particle stimulus	0.00118689	0.00495491	0.00281482	3
m14	BP	GO:0072666	establishment of protein localization to vacuole	0.00118689	0.00495491	0.00281482	3
m14	BP	GO:1903317	regulation of protein maturation	0.00120033	0.00500498	0.00284327	7
m14	BP	GO:0002712	regulation of B cell mediated immunity	0.00123832	0.0051264	0.00291224	4
m14	BP	GO:0002889	regulation of immunoglobulin mediated immune response	0.00123832	0.0051264	0.00291224	4
m14	BP	GO:0045620	negative regulation of lymphocyte differentiation	0.00123832	0.0051264	0.00291224	4
m14	BP	GO:0046579	positive regulation of Ras protein signal transduction	0.00123832	0.0051264	0.00291224	4
m14	BP	GO:0050702	interleukin-1 beta secretion	0.00123832	0.0051264	0.00291224	4
m14	BP	GO:0070228	regulation of lymphocyte apoptotic process	0.00123832	0.0051264	0.00291224	4
m14	BP	GO:0031331	positive regulation of cellular catabolic process	0.00126573	0.00523359	0.00297313	10
m14	BP	GO:0016525	negative regulation of angiogenesis	0.00128181	0.00529376	0.00300731	7
m14	BP	GO:0001889	liver development	0.00129868	0.00535707	0.00304328	6
m14	BP	GO:0002886	regulation of myeloid leukocyte mediated immunity	0.00133199	0.00547491	0.00311023	4
m14	BP	GO:0007566	embryo implantation	0.00133199	0.00547491	0.00311023	4
m14	BP	GO:2000242	negative regulation of reproductive process	0.00133199	0.00547491	0.00311023	4
m14	BP	GO:0036003	positive regulation of transcription from RNA polymerase II promoter in response to stress	0.00134732	0.00549879	0.00312379	3
m14	BP	GO:0042104	positive regulation of activated T cell proliferation	0.00134732	0.00549879	0.00312379	3
m14	BP	GO:0042481	regulation of odontogenesis	0.00134732	0.00549879	0.00312379	3
m14	BP	GO:0046639	negative regulation of alpha-beta T cell differentiation	0.00134732	0.00549879	0.00312379	3
m14	BP	GO:0150078	positive regulation of neuroinflammatory response	0.00134732	0.00549879	0.00312379	3
m14	BP	GO:1905564	positive regulation of vascular endothelial cell proliferation	0.00134732	0.00549879	0.00312379	3
m14	BP	GO:0050890	cognition	0.0013609	0.00554769	0.00315157	9
m14	BP	GO:2000181	negative regulation of blood vessel morphogenesis	0.00136756	0.00556825	0.00316325	7
m14	BP	GO:0032964	collagen biosynthetic process	0.0014305	0.00580407	0.00329721	4
m14	BP	GO:0046456	icosanoid biosynthetic process	0.0014305	0.00580407	0.00329721	4
m14	BP	GO:0050853	B cell receptor signaling pathway	0.0014305	0.00580407	0.00329721	4
m14	BP	GO:0061008	hepaticobiliary system development	0.0014599	0.00591643	0.00336105	6
m14	BP	GO:0051961	negative regulation of nervous system development	0.00149757	0.00606202	0.00344375	9
m14	BP	GO:0031664	regulation of lipopolysaccharide-mediated signaling pathway	0.00152075	0.00613435	0.00348484	3
m14	BP	GO:0032616	interleukin-13 production	0.00152075	0.00613435	0.00348484	3
m14	BP	GO:0045408	regulation of interleukin-6 biosynthetic process	0.00152075	0.00613435	0.00348484	3
m14	BP	GO:0072001	renal system development	0.00153341	0.00614475	0.00349075	9
m14	BP	GO:0060337	type I interferon signaling pathway	0.00153369	0.00614475	0.00349075	5
m14	BP	GO:0071357	cellular response to type I interferon	0.00153369	0.00614475	0.00349075	5
m14	BP	GO:0002763	positive regulation of myeloid leukocyte differentiation	0.00153397	0.00614475	0.00349075	4
m14	BP	GO:0006636	unsaturated fatty acid biosynthetic process	0.00153397	0.00614475	0.00349075	4
m14	BP	GO:0032715	negative regulation of interleukin-6 production	0.00153397	0.00614475	0.00349075	4
m14	BP	GO:0031102	neuron projection regeneration	0.00164255	0.0065645	0.00372921	4
m14	BP	GO:0031663	lipopolysaccharide-mediated signaling pathway	0.00164255	0.0065645	0.00372921	4
m14	BP	GO:0051402	neuron apoptotic process	0.00165813	0.00661914	0.00376024	8
m14	BP	GO:0044070	regulation of anion transport	0.00168896	0.00673446	0.00382576	5
m14	BP	GO:0015718	monocarboxylic acid transport	0.00169807	0.00676192	0.00384136	6
m14	BP	GO:0002360	T cell lineage commitment	0.00170756	0.00676192	0.00384136	3
m14	BP	GO:0002507	tolerance induction	0.00170756	0.00676192	0.00384136	3
m14	BP	GO:0007263	nitric oxide mediated signal transduction	0.00170756	0.00676192	0.00384136	3
m14	BP	GO:0033598	mammary gland epithelial cell proliferation	0.00170756	0.00676192	0.00384136	3
m14	BP	GO:0039528	cytoplasmic pattern recognition receptor signaling pathway in response to virus	0.00170756	0.00676192	0.00384136	3
m14	BP	GO:0030316	osteoclast differentiation	0.00177078	0.00700427	0.00397904	5
m14	BP	GO:0051896	regulation of protein kinase B signaling	0.00179371	0.00708688	0.00402596	8
m14	BP	GO:0019722	calcium-mediated signaling	0.00181041	0.00714472	0.00405882	7
m14	BP	GO:0007589	body fluid secretion	0.00185546	0.00730589	0.00415038	5
m14	BP	GO:0034340	response to type I interferon	0.00185546	0.00730589	0.00415038	5
m14	BP	GO:0017038	protein import	0.00189524	0.00744544	0.00422965	6
m14	BP	GO:0003081	regulation of systemic arterial blood pressure by renin-angiotensin	0.00190809	0.00744544	0.00422965	3
m14	BP	GO:0032673	regulation of interleukin-4 production	0.00190809	0.00744544	0.00422965	3
m14	BP	GO:0035456	response to interferon-beta	0.00190809	0.00744544	0.00422965	3
m14	BP	GO:0042226	interleukin-6 biosynthetic process	0.00190809	0.00744544	0.00422965	3
m14	BP	GO:0045907	positive regulation of vasoconstriction	0.00190809	0.00744544	0.00422965	3
m14	BP	GO:0046640	regulation of alpha-beta T cell proliferation	0.00190809	0.00744544	0.00422965	3
m14	BP	GO:2000515	negative regulation of CD4-positive, alpha-beta T cell activation	0.00190809	0.00744544	0.00422965	3
m14	BP	GO:0007044	cell-substrate junction assembly	0.00194308	0.00757342	0.00430236	5
m14	BP	GO:1901343	negative regulation of vasculature development	0.00198043	0.00771031	0.00438013	7
m14	BP	GO:0051057	positive regulation of small GTPase mediated signal transduction	0.00200015	0.00777838	0.00441879	4
m14	BP	GO:0120162	positive regulation of cold-induced thermogenesis	0.00203368	0.00789991	0.00448783	5
m14	BP	GO:0000737	DNA catabolic process, endonucleolytic	0.00212271	0.00817245	0.00464266	3
m14	BP	GO:0001516	prostaglandin biosynthetic process	0.00212271	0.00817245	0.00464266	3
m14	BP	GO:0033032	regulation of myeloid cell apoptotic process	0.00212271	0.00817245	0.00464266	3
m14	BP	GO:0042533	tumor necrosis factor biosynthetic process	0.00212271	0.00817245	0.00464266	3
m14	BP	GO:0042534	regulation of tumor necrosis factor biosynthetic process	0.00212271	0.00817245	0.00464266	3
m14	BP	GO:0045577	regulation of B cell differentiation	0.00212271	0.00817245	0.00464266	3
m14	BP	GO:0046457	prostanoid biosynthetic process	0.00212271	0.00817245	0.00464266	3
m14	BP	GO:0070229	negative regulation of lymphocyte apoptotic process	0.00212271	0.00817245	0.00464266	3
m14	BP	GO:0070059	intrinsic apoptotic signaling pathway in response to endoplasmic reticulum stress	0.00213041	0.00819299	0.00465433	4
m14	BP	GO:0045834	positive regulation of lipid metabolic process	0.00218454	0.00839183	0.00476729	6
m14	BP	GO:1902106	negative regulation of leukocyte differentiation	0.0022241	0.00853433	0.00484824	5
m14	BP	GO:2000027	regulation of animal organ morphogenesis	0.0022537	0.00863835	0.00490733	8
m14	BP	GO:0050806	positive regulation of synaptic transmission	0.00226181	0.00864882	0.00491328	6
m14	BP	GO:1905953	negative regulation of lipid localization	0.00226641	0.00864882	0.00491328	4
m14	BP	GO:1990868	response to chemokine	0.00226641	0.00864882	0.00491328	4
m14	BP	GO:1990869	cellular response to chemokine	0.00226641	0.00864882	0.00491328	4
m14	BP	GO:0043524	negative regulation of neuron apoptotic process	0.00234111	0.00892405	0.00506964	6
m14	BP	GO:0070102	interleukin-6-mediated signaling pathway	0.00235175	0.00892531	0.00507035	3
m14	BP	GO:0072538	T-helper 17 type immune response	0.00235175	0.00892531	0.00507035	3
m14	BP	GO:1900117	regulation of execution phase of apoptosis	0.00235175	0.00892531	0.00507035	3
m14	BP	GO:1904994	regulation of leukocyte adhesion to vascular endothelial cell	0.00235175	0.00892531	0.00507035	3
m14	BP	GO:0051893	regulation of focal adhesion assembly	0.00240828	0.00911988	0.00518089	4
m14	BP	GO:0090109	regulation of cell-substrate junction assembly	0.00240828	0.00911988	0.00518089	4
m14	BP	GO:1902903	regulation of supramolecular fiber organization	0.00251311	0.00950646	0.0054005	9
m14	BP	GO:0006690	icosanoid metabolic process	0.00253363	0.00957365	0.00543866	5
m14	BP	GO:0007204	positive regulation of cytosolic calcium ion concentration	0.00254661	0.0096122	0.00546057	8
m14	BP	GO:0043550	regulation of lipid kinase activity	0.00255614	0.00963768	0.00547504	4
m14	BP	GO:0032689	negative regulation of interferon-gamma production	0.00259552	0.00975432	0.0055413	3
m14	BP	GO:0046633	alpha-beta T cell proliferation	0.00259552	0.00975432	0.0055413	3
m14	BP	GO:0061082	myeloid leukocyte cytokine production	0.00259552	0.00975432	0.0055413	3
m14	BP	GO:2001020	regulation of response to DNA damage stimulus	0.00263794	0.00990297	0.00562575	7
m14	BP	GO:0006606	protein import into nucleus	0.00264343	0.00991286	0.00563136	5
m14	CC	GO:0009897	external side of plasma membrane	4.14581e-18	9.36954e-16	6.98242e-16	22
m14	CC	GO:0098552	side of membrane	1.22024e-15	1.37887e-13	1.02757e-13	25
m14	CC	GO:0031091	platelet alpha granule	5.98365e-14	4.50768e-12	3.35924e-12	14
m14	CC	GO:0060205	cytoplasmic vesicle lumen	2.49299e-12	1.1923e-10	8.8853e-11	21
m14	CC	GO:0031983	vesicle lumen	2.63782e-12	1.1923e-10	8.8853e-11	21
m14	CC	GO:0031012	extracellular matrix	3.68671e-12	1.38866e-10	1.03487e-10	24
m14	CC	GO:0043235	receptor complex	1.32409e-11	4.27492e-10	3.18578e-10	19
m14	CC	GO:0031093	platelet alpha granule lumen	1.53236e-11	4.32893e-10	3.22603e-10	11
m14	CC	GO:0034774	secretory granule lumen	6.79827e-11	1.70712e-09	1.27219e-09	19
m14	CC	GO:0030667	secretory granule membrane	9.84135e-10	2.09431e-08	1.56073e-08	17
m14	CC	GO:0098802	plasma membrane receptor complex	1.01935e-09	2.09431e-08	1.56073e-08	13
m14	CC	GO:0005788	endoplasmic reticulum lumen	1.37932e-08	2.4947e-07	1.85911e-07	16
m14	CC	GO:0045121	membrane raft	1.58228e-08	2.4947e-07	1.85911e-07	16
m14	CC	GO:0062023	collagen-containing extracellular matrix	1.63156e-08	2.4947e-07	1.85911e-07	18
m14	CC	GO:0098857	membrane microdomain	1.65577e-08	2.4947e-07	1.85911e-07	16
m14	CC	GO:0098589	membrane region	2.69771e-08	3.81052e-07	2.8397e-07	16
m14	CC	GO:0035631	CD40 receptor complex	1.84645e-06	2.45469e-05	1.8293e-05	4
m14	CC	GO:0070820	tertiary granule	2.00869e-06	2.52202e-05	1.87948e-05	10
m14	CC	GO:0005796	Golgi lumen	3.39225e-06	4.03499e-05	3.00698e-05	8
m14	CC	GO:0101002	ficolin-1-rich granule	5.90709e-06	6.67502e-05	4.97439e-05	10
m14	CC	GO:0098797	plasma membrane protein complex	1.16588e-05	0.000125471	9.35043e-05	15
m14	CC	GO:0042581	specific granule	1.27002e-05	0.000125542	9.3557e-05	9
m14	CC	GO:0031092	platelet alpha granule membrane	1.27764e-05	0.000125542	9.3557e-05	4
m14	CC	GO:0036019	endolysosome	1.63138e-05	0.000153622	0.000114483	4
m14	CC	GO:0005925	focal adhesion	5.34301e-05	0.000483008	0.00035995	13
m14	CC	GO:0005924	cell-substrate adherens junction	5.62337e-05	0.000488801	0.000364267	13
m14	CC	GO:0030055	cell-substrate junction	6.38099e-05	0.000534113	0.000398035	13
m14	CC	GO:0036020	endolysosome membrane	0.000181411	0.00146424	0.00109119	3
m14	CC	GO:0098636	protein complex involved in cell adhesion	0.000196752	0.00152193	0.00113418	4
m14	CC	GO:0101003	ficolin-1-rich granule membrane	0.000202026	0.00152193	0.00113418	5
m14	CC	GO:0070821	tertiary granule membrane	0.000468467	0.00334761	0.00249473	5
m14	CC	GO:0005912	adherens junction	0.000473998	0.00334761	0.00249473	13
m14	CC	GO:0035579	specific granule membrane	0.00127708	0.00874608	0.0065178	5
m14	CC	GO:1904724	tertiary granule lumen	0.00141042	0.00937514	0.0069866	4
m14	MF	GO:0004896	cytokine receptor activity	4.47701e-25	1.46398e-22	1.0792e-22	21
m14	MF	GO:0005125	cytokine activity	4.52502e-21	7.3984e-19	5.45383e-19	23
m14	MF	GO:0030545	receptor regulator activity	9.56058e-18	1.0421e-15	7.68201e-16	30
m14	MF	GO:0048018	receptor ligand activity	1.4243e-17	1.16437e-15	8.58331e-16	29
m14	MF	GO:0005126	cytokine receptor binding	1.13859e-15	7.44638e-14	5.4892e-14	21
m14	MF	GO:0005178	integrin binding	1.21984e-08	6.64813e-07	4.90076e-07	11
m14	MF	GO:0008083	growth factor activity	1.9271e-08	9.00231e-07	6.63618e-07	12
m14	MF	GO:0019955	cytokine binding	4.42644e-08	1.80931e-06	1.33376e-06	10
m14	MF	GO:0005539	glycosaminoglycan binding	6.96629e-08	2.53109e-06	1.86583e-06	13
m14	MF	GO:0042379	chemokine receptor binding	3.14802e-07	1.0294e-05	7.58837e-06	7
m14	MF	GO:0001618	virus receptor activity	5.62568e-07	1.533e-05	1.13007e-05	8
m14	MF	GO:0104005	hijacked molecular function	5.62568e-07	1.533e-05	1.13007e-05	8
m14	MF	GO:0008201	heparin binding	1.75085e-06	4.40406e-05	3.24651e-05	10
m14	MF	GO:0032813	tumor necrosis factor receptor superfamily binding	4.43377e-06	0.00010356	7.63408e-05	6
m14	MF	GO:0005164	tumor necrosis factor receptor binding	9.29707e-06	0.000190009	0.000140068	5
m14	MF	GO:0008009	chemokine activity	9.29707e-06	0.000190009	0.000140068	5
m14	MF	GO:0030169	low-density lipoprotein particle binding	1.05658e-05	0.000203236	0.000149818	4
m14	MF	GO:0070851	growth factor receptor binding	2.28791e-05	0.000415636	0.000306392	8
m14	MF	GO:0001664	G protein-coupled receptor binding	3.10396e-05	0.000534209	0.000393799	10
m14	MF	GO:0042277	peptide binding	4.65073e-05	0.000760395	0.000560536	10
m14	MF	GO:1901681	sulfur compound binding	5.863e-05	0.000912953	0.000672996	10
m14	MF	GO:0001540	amyloid-beta binding	6.33793e-05	0.000942046	0.000694443	6
m14	MF	GO:0004175	endopeptidase activity	7.08738e-05	0.00100764	0.000742797	12
m14	MF	GO:0048020	CCR chemokine receptor binding	0.000106509	0.00145119	0.00106977	4
m14	MF	GO:0031996	thioesterase binding	0.000138153	0.00180704	0.00133209	3
m14	MF	GO:0035259	glucocorticoid receptor binding	0.000182897	0.00229451	0.00169143	3
m14	MF	GO:0001530	lipopolysaccharide binding	0.000189455	0.00229451	0.00169143	4
m14	MF	GO:0033218	amide binding	0.000267569	0.00312482	0.00230351	10
m14	MF	GO:0005161	platelet-derived growth factor receptor binding	0.000298338	0.00328169	0.00241915	3
m14	MF	GO:0071813	lipoprotein particle binding	0.000311109	0.00328169	0.00241915	4
m14	MF	GO:0071814	protein-lipid complex binding	0.000311109	0.00328169	0.00241915	4
m14	MF	GO:0001786	phosphatidylserine binding	0.000348624	0.0035625	0.00262614	4
m14	MF	GO:0050839	cell adhesion molecule binding	0.000385902	0.00382394	0.00281887	13
m14	MF	GO:0008237	metallopeptidase activity	0.000721294	0.00693715	0.00511382	7
m14	MF	GO:0050840	extracellular matrix binding	0.000773833	0.00722981	0.00532956	4
m14	MF	GO:0008236	serine-type peptidase activity	0.00087177	0.00791857	0.00583729	7
m14	MF	GO:0000978	RNA polymerase II proximal promoter sequence-specific DNA binding	0.00102205	0.00900116	0.00663533	12
m14	MF	GO:0017171	serine hydrolase activity	0.00104601	0.00900116	0.00663533	7
m14	MF	GO:0046982	protein heterodimerization activity	0.00109765	0.00920335	0.00678438	13
m14	MF	GO:0002020	protease binding	0.00114453	0.00935652	0.00689729	6
m15	BP	GO:0007059	chromosome segregation	1.61666e-19	1.24483e-16	8.42364e-17	18
m15	BP	GO:0140014	mitotic nuclear division	4.2898e-16	1.65157e-13	1.11761e-13	15
m15	BP	GO:0000280	nuclear division	8.95567e-15	2.29862e-12	1.55546e-12	16
m15	BP	GO:0048285	organelle fission	4.30605e-14	8.28319e-12	5.60516e-12	16
m15	BP	GO:0000819	sister chromatid segregation	5.37869e-14	8.28319e-12	5.60516e-12	12
m15	BP	GO:0098813	nuclear chromosome segregation	1.20244e-13	1.54313e-11	1.04422e-11	13
m15	BP	GO:0051983	regulation of chromosome segregation	2.53327e-13	2.46412e-11	1.66745e-11	10
m15	BP	GO:0000070	mitotic sister chromatid segregation	2.56012e-13	2.46412e-11	1.66745e-11	11
m15	BP	GO:0000226	microtubule cytoskeleton organization	4.47916e-13	3.83217e-11	2.5932e-11	16
m15	BP	GO:0007051	spindle organization	8.44875e-13	6.50554e-11	4.40225e-11	11
m15	BP	GO:0071459	protein localization to chromosome, centromeric region	3.70723e-11	2.59506e-09	1.75606e-09	6
m15	BP	GO:0006260	DNA replication	4.07764e-10	2.61649e-08	1.77056e-08	11
m15	BP	GO:0000075	cell cycle checkpoint	4.72383e-10	2.79796e-08	1.89336e-08	10
m15	BP	GO:1901990	regulation of mitotic cell cycle phase transition	5.13006e-10	2.82153e-08	1.90931e-08	13
m15	BP	GO:0007093	mitotic cell cycle checkpoint	7.19718e-10	3.69455e-08	2.50007e-08	9
m15	BP	GO:0007088	regulation of mitotic nuclear division	8.61483e-10	4.14589e-08	2.80549e-08	9
m15	BP	GO:0034501	protein localization to kinetochore	1.05817e-09	4.79291e-08	3.24332e-08	5
m15	BP	GO:1901987	regulation of cell cycle phase transition	1.37032e-09	5.86191e-08	3.9667e-08	13
m15	BP	GO:0033045	regulation of sister chromatid segregation	2.03806e-09	8.25952e-08	5.58915e-08	7
m15	BP	GO:0045930	negative regulation of mitotic cell cycle	2.43163e-09	9.36178e-08	6.33504e-08	11
m15	BP	GO:0051783	regulation of nuclear division	2.89277e-09	1.06068e-07	7.17756e-08	9
m15	BP	GO:0051383	kinetochore organization	3.72042e-09	1.30215e-07	8.81152e-08	5
m15	BP	GO:0034502	protein localization to chromosome	6.28003e-09	2.10244e-07	1.42271e-07	7
m15	BP	GO:0007091	metaphase/anaphase transition of mitotic cell cycle	6.89268e-09	2.12295e-07	1.43658e-07	6
m15	BP	GO:0010965	regulation of mitotic sister chromatid separation	6.89268e-09	2.12295e-07	1.43658e-07	6
m15	BP	GO:0044784	metaphase/anaphase transition of cell cycle	8.93361e-09	2.54773e-07	1.72403e-07	6
m15	BP	GO:0051306	mitotic sister chromatid separation	8.93361e-09	2.54773e-07	1.72403e-07	6
m15	BP	GO:1905818	regulation of chromosome separation	1.2913e-08	3.55106e-07	2.40297e-07	6
m15	BP	GO:0007052	mitotic spindle organization	1.76928e-08	4.5493e-07	3.07847e-07	7
m15	BP	GO:0045787	positive regulation of cell cycle	1.77245e-08	4.5493e-07	3.07847e-07	11
m15	BP	GO:0033047	regulation of mitotic sister chromatid segregation	2.27427e-08	5.649e-07	3.82263e-07	6
m15	BP	GO:0008608	attachment of spindle microtubules to kinetochore	2.78944e-08	6.71208e-07	4.54201e-07	5
m15	BP	GO:0051304	chromosome separation	6.68128e-08	1.55897e-06	1.05494e-06	6
m15	BP	GO:1902850	microtubule cytoskeleton organization involved in mitosis	7.09882e-08	1.60767e-06	1.0879e-06	7
m15	BP	GO:0090068	positive regulation of cell cycle process	2.13598e-07	4.69915e-06	3.17987e-06	9
m15	BP	GO:0045839	negative regulation of mitotic nuclear division	2.76281e-07	5.90933e-06	3.9988e-06	5
m15	BP	GO:0051225	spindle assembly	3.60545e-07	7.50323e-06	5.07738e-06	6
m15	BP	GO:0031109	microtubule polymerization or depolymerization	4.67002e-07	9.46293e-06	6.40349e-06	6
m15	BP	GO:0051784	negative regulation of nuclear division	5.78026e-07	1.14123e-05	7.72262e-06	5
m15	BP	GO:0006336	DNA replication-independent nucleosome assembly	6.36724e-07	1.1958e-05	8.09187e-06	5
m15	BP	GO:0034724	DNA replication-independent nucleosome organization	6.36724e-07	1.1958e-05	8.09187e-06	5
m15	BP	GO:0006275	regulation of DNA replication	7.57665e-07	1.34437e-05	9.09722e-06	6
m15	BP	GO:0043486	histone exchange	7.6821e-07	1.34437e-05	9.09722e-06	5
m15	BP	GO:0051310	metaphase plate congression	7.6821e-07	1.34437e-05	9.09722e-06	5
m15	BP	GO:0044786	cell cycle DNA replication	9.20254e-07	1.57466e-05	1.06556e-05	5
m15	BP	GO:0070507	regulation of microtubule cytoskeleton organization	9.60755e-07	1.60822e-05	1.08827e-05	7
m15	BP	GO:0010389	regulation of G2/M transition of mitotic cell cycle	1.69234e-06	2.77256e-05	1.87617e-05	7
m15	BP	GO:0031023	microtubule organizing center organization	2.16799e-06	3.47782e-05	2.35341e-05	6
m15	BP	GO:0032886	regulation of microtubule-based process	2.74919e-06	4.31137e-05	2.91747e-05	7
m15	BP	GO:0045841	negative regulation of mitotic metaphase/anaphase transition	2.88571e-06	4.31137e-05	2.91747e-05	4
m15	BP	GO:2000816	negative regulation of mitotic sister chromatid separation	2.88571e-06	4.31137e-05	2.91747e-05	4
m15	BP	GO:0050000	chromosome localization	2.96757e-06	4.31137e-05	2.91747e-05	5
m15	BP	GO:0051303	establishment of chromosome localization	2.96757e-06	4.31137e-05	2.91747e-05	5
m15	BP	GO:1902749	regulation of cell cycle G2/M phase transition	3.03571e-06	4.32869e-05	2.92919e-05	7
m15	BP	GO:0006261	DNA-dependent DNA replication	3.13777e-06	4.39288e-05	2.97262e-05	6
m15	BP	GO:1902100	negative regulation of metaphase/anaphase transition of cell cycle	3.27612e-06	4.42564e-05	2.99479e-05	4
m15	BP	GO:1905819	negative regulation of chromosome separation	3.27612e-06	4.42564e-05	2.99479e-05	4
m15	BP	GO:0043044	ATP-dependent chromatin remodeling	4.14116e-06	5.4456e-05	3.68499e-05	5
m15	BP	GO:0033048	negative regulation of mitotic sister chromatid segregation	4.1726e-06	5.4456e-05	3.68499e-05	4
m15	BP	GO:0033046	negative regulation of sister chromatid segregation	5.23879e-06	6.72311e-05	4.54947e-05	4
m15	BP	GO:0051985	negative regulation of chromosome segregation	5.84154e-06	7.37374e-05	4.98975e-05	4
m15	BP	GO:0051988	regulation of attachment of spindle microtubules to kinetochore	6.241e-06	7.75091e-05	5.24498e-05	3
m15	BP	GO:0007080	mitotic metaphase plate congression	7.95864e-06	9.72722e-05	6.58233e-05	4
m15	BP	GO:0045931	positive regulation of mitotic cell cycle	8.33948e-06	0.000100334	6.78955e-05	6
m15	BP	GO:0034080	CENP-A containing nucleosome assembly	8.776e-06	0.000102387	6.92842e-05	4
m15	BP	GO:0061641	CENP-A containing chromatin organization	8.776e-06	0.000102387	6.92842e-05	4
m15	BP	GO:0000086	G2/M transition of mitotic cell cycle	8.91769e-06	0.000102487	6.9352e-05	7
m15	BP	GO:0030071	regulation of mitotic metaphase/anaphase transition	1.05944e-05	0.000119966	8.11801e-05	4
m15	BP	GO:0031055	chromatin remodeling at centromere	1.26765e-05	0.000139441	9.43587e-05	4
m15	BP	GO:1902099	regulation of metaphase/anaphase transition of cell cycle	1.26765e-05	0.000139441	9.43587e-05	4
m15	BP	GO:0033260	nuclear DNA replication	1.38236e-05	0.000149918	0.000101448	4
m15	BP	GO:0044839	cell cycle G2/M phase transition	1.46827e-05	0.000157023	0.000106256	7
m15	BP	GO:0090329	regulation of DNA-dependent DNA replication	1.50453e-05	0.000158697	0.000107389	4
m15	BP	GO:0051382	kinetochore assembly	1.57458e-05	0.000163841	0.00011087	3
m15	BP	GO:0000082	G1/S transition of mitotic cell cycle	1.97073e-05	0.000202328	0.000136914	7
m15	BP	GO:0034508	centromere complex assembly	2.41151e-05	0.000244324	0.000165332	4
m15	BP	GO:0007098	centrosome cycle	2.58786e-05	0.000258786	0.000175118	5
m15	BP	GO:0044843	cell cycle G1/S phase transition	3.05178e-05	0.000301266	0.000203864	7
m15	BP	GO:0065004	protein-DNA complex assembly	4.81519e-05	0.000469328	0.000317591	6
m15	BP	GO:0033044	regulation of chromosome organization	4.97166e-05	0.000478522	0.000323812	7
m15	BP	GO:0046785	microtubule polymerization	5.3449e-05	0.000508096	0.000343824	4
m15	BP	GO:0006334	nucleosome assembly	6.33318e-05	0.000590652	0.000399689	5
m15	BP	GO:0031110	regulation of microtubule polymerization or depolymerization	6.36676e-05	0.000590652	0.000399689	4
m15	BP	GO:0032201	telomere maintenance via semi-conservative replication	8.02614e-05	0.00073573	0.000497862	3
m15	BP	GO:0010948	negative regulation of cell cycle process	9.36471e-05	0.000848332	0.00057406	7
m15	BP	GO:0000083	regulation of transcription involved in G1/S transition of mitotic cell cycle	9.98216e-05	0.000891847	0.000603506	3
m15	BP	GO:0071824	protein-DNA complex subunit organization	0.000100767	0.000891847	0.000603506	6
m15	BP	GO:0051493	regulation of cytoskeleton organization	0.00010248	0.000896703	0.000606791	8
m15	BP	GO:0007094	mitotic spindle assembly checkpoint	0.000110667	0.000926238	0.000626778	3
m15	BP	GO:0031577	spindle checkpoint	0.000110667	0.000926238	0.000626778	3
m15	BP	GO:0071173	spindle assembly checkpoint	0.000110667	0.000926238	0.000626778	3
m15	BP	GO:0071174	mitotic spindle checkpoint	0.000110667	0.000926238	0.000626778	3
m15	BP	GO:0031497	chromatin assembly	0.000114488	0.000947914	0.000641446	5
m15	BP	GO:1901992	positive regulation of mitotic cell cycle phase transition	0.000124991	0.00101664	0.00068795	4
m15	BP	GO:0006338	chromatin remodeling	0.000125429	0.00101664	0.00068795	5
m15	BP	GO:0034728	nucleosome organization	0.000163114	0.00130831	0.000885321	5
m15	BP	GO:0032467	positive regulation of cytokinesis	0.000208536	0.00165539	0.00112019	3
m15	BP	GO:0071103	DNA conformation change	0.000228557	0.0017958	0.00121521	6
m15	BP	GO:0006333	chromatin assembly or disassembly	0.000232148	0.0018056	0.00122183	5
m15	BP	GO:1901989	positive regulation of cell cycle phase transition	0.000239153	0.00184148	0.00124611	4
m15	BP	GO:0051052	regulation of DNA metabolic process	0.000248345	0.00189332	0.0012812	7
m15	BP	GO:0090224	regulation of spindle organization	0.000283578	0.00214073	0.00144862	3
m15	BP	GO:0006323	DNA packaging	0.000345368	0.00258187	0.00174713	5
m15	BP	GO:0051315	attachment of mitotic spindle microtubules to kinetochore	0.000425075	0.00312154	0.00211232	2
m15	BP	GO:0072698	protein localization to microtubule cytoskeleton	0.000425664	0.00312154	0.00211232	3
m15	BP	GO:0036297	interstrand cross-link repair	0.000511123	0.00367817	0.00248899	3
m15	BP	GO:0044380	protein localization to cytoskeleton	0.000511123	0.00367817	0.00248899	3
m15	BP	GO:0000076	DNA replication checkpoint	0.000518494	0.00369667	0.00250151	2
m15	BP	GO:2001251	negative regulation of chromosome organization	0.000626991	0.0044292	0.00299721	4
m15	BP	GO:0010639	negative regulation of organelle organization	0.000782895	0.00548027	0.00370845	6
m15	BP	GO:1901991	negative regulation of mitotic cell cycle phase transition	0.000825063	0.00572341	0.00387299	5
m15	BP	GO:0090231	regulation of spindle checkpoint	0.00085272	0.0057596	0.00389747	2
m15	BP	GO:0090266	regulation of mitotic cell cycle spindle assembly checkpoint	0.00085272	0.0057596	0.00389747	2
m15	BP	GO:1903504	regulation of mitotic spindle checkpoint	0.00085272	0.0057596	0.00389747	2
m15	BP	GO:0031570	DNA integrity checkpoint	0.000983695	0.00658648	0.00445701	4
m15	BP	GO:0022616	DNA strand elongation	0.00111996	0.00743423	0.00503068	2
m15	BP	GO:1901988	negative regulation of cell cycle phase transition	0.00116743	0.00768308	0.00519908	5
m15	BP	GO:0051895	negative regulation of focal adhesion assembly	0.00142223	0.00928068	0.00628016	2
m15	CC	GO:0000775	chromosome, centromeric region	1.6068e-28	2.07278e-26	1.40384e-26	21
m15	CC	GO:0000776	kinetochore	5.82279e-26	3.7557e-24	2.54364e-24	18
m15	CC	GO:0000779	condensed chromosome, centromeric region	1.92485e-25	8.27684e-24	5.60569e-24	17
m15	CC	GO:0098687	chromosomal region	1.66161e-24	5.35871e-23	3.62932e-23	22
m15	CC	GO:0000777	condensed chromosome kinetochore	3.25571e-24	8.39974e-23	5.68893e-23	16
m15	CC	GO:0000793	condensed chromosome	1.46221e-22	3.14376e-21	2.12919e-21	18
m15	CC	GO:0005819	spindle	1.11638e-21	2.05734e-20	1.39338e-20	20
m15	CC	GO:0000940	condensed chromosome outer kinetochore	1.43259e-10	2.31005e-09	1.56454e-09	5
m15	CC	GO:0000922	spindle pole	5.69961e-10	8.16945e-09	5.53296e-09	9
m15	CC	GO:0005874	microtubule	6.01755e-09	7.76264e-08	5.25744e-08	11
m15	CC	GO:0072686	mitotic spindle	1.35412e-08	1.58801e-07	1.07552e-07	7
m15	CC	GO:0005876	spindle microtubule	4.73667e-07	5.09192e-06	3.44863e-06	5
m15	CC	GO:0051233	spindle midzone	1.12278e-06	1.11414e-05	7.5458e-06	4
m15	CC	GO:0030496	midbody	1.07828e-05	9.93554e-05	6.72909e-05	6
m15	CC	GO:0000780	condensed nuclear chromosome, centromeric region	1.59557e-05	0.000137219	9.29352e-05	3
m15	CC	GO:0044454	nuclear chromosome part	6.43344e-05	0.000501855	0.000339893	8
m15	CC	GO:0005813	centrosome	6.82731e-05	0.000501855	0.000339893	8
m15	CC	GO:0000794	condensed nuclear chromosome	7.00262e-05	0.000501855	0.000339893	4
m15	CC	GO:0031080	nuclear pore outer ring	0.000377361	0.00256208	0.00173523	2
m15	CC	GO:1990023	mitotic spindle midzone	0.000460347	0.00296924	0.00201099	2
m15	CC	GO:0005657	replication fork	0.000538819	0.00330989	0.0022417	3
m15	CC	GO:0042575	DNA polymerase complex	0.000650393	0.00381367	0.0025829	2
m15	CC	GO:0005721	pericentric heterochromatin	0.00156349	0.00812118	0.00550027	2
m15	CC	GO:0030894	replisome	0.00156349	0.00812118	0.00550027	2
m15	CC	GO:0044450	microtubule organizing center part	0.00157387	0.00812118	0.00550027	4
m15	MF	GO:0008017	microtubule binding	2.85423e-09	2.48318e-07	1.98294e-07	9
m15	MF	GO:0015631	tubulin binding	1.06762e-07	4.64414e-06	3.70857e-06	9
m16	BP	GO:0006732	coenzyme metabolic process	1.85366e-33	1.99639e-30	1.53171e-30	37
m16	BP	GO:0016054	organic acid catabolic process	7.24974e-28	2.60266e-25	1.99686e-25	29
m16	BP	GO:0046395	carboxylic acid catabolic process	7.24974e-28	2.60266e-25	1.99686e-25	29
m16	BP	GO:0044282	small molecule catabolic process	1.01815e-26	2.74138e-24	2.10329e-24	33
m16	BP	GO:0009108	coenzyme biosynthetic process	1.20532e-22	2.47512e-20	1.89901e-20	25
m16	BP	GO:0051188	cofactor biosynthetic process	1.3789e-22	2.47512e-20	1.89901e-20	27
m16	BP	GO:0006631	fatty acid metabolic process	1.47154e-21	2.26407e-19	1.73708e-19	27
m16	BP	GO:0009150	purine ribonucleotide metabolic process	2.59385e-19	3.49197e-17	2.67917e-17	29
m16	BP	GO:0046390	ribose phosphate biosynthetic process	1.35924e-18	1.62656e-16	1.24796e-16	23
m16	BP	GO:0009152	purine ribonucleotide biosynthetic process	5.21943e-18	5.62133e-16	4.3129e-16	22
m16	BP	GO:1901568	fatty acid derivative metabolic process	1.43069e-17	1.29798e-15	9.95864e-16	18
m16	BP	GO:0009260	ribonucleotide biosynthetic process	1.45141e-17	1.29798e-15	9.95864e-16	22
m16	BP	GO:0006164	purine nucleotide biosynthetic process	1.56674e-17	1.29798e-15	9.95864e-16	22
m16	BP	GO:0016999	antibiotic metabolic process	1.71901e-17	1.32241e-15	1.0146e-15	17
m16	BP	GO:0009165	nucleotide biosynthetic process	2.02499e-17	1.45394e-15	1.11552e-15	24
m16	BP	GO:1901293	nucleoside phosphate biosynthetic process	2.77621e-17	1.86874e-15	1.43377e-15	24
m16	BP	GO:0072522	purine-containing compound biosynthetic process	3.56278e-17	2.25713e-15	1.73176e-15	22
m16	BP	GO:0006733	oxidoreduction coenzyme metabolic process	4.05165e-17	2.42424e-15	1.85997e-15	19
m16	BP	GO:0046394	carboxylic acid biosynthetic process	8.1892e-17	4.64198e-15	3.56151e-15	25
m16	BP	GO:0016053	organic acid biosynthetic process	8.65276e-17	4.65951e-15	3.57496e-15	25
m16	BP	GO:0033865	nucleoside bisphosphate metabolic process	2.95862e-16	1.38541e-14	1.06294e-14	16
m16	BP	GO:0033875	ribonucleoside bisphosphate metabolic process	2.95862e-16	1.38541e-14	1.06294e-14	16
m16	BP	GO:0034032	purine nucleoside bisphosphate metabolic process	2.95862e-16	1.38541e-14	1.06294e-14	16
m16	BP	GO:0033866	nucleoside bisphosphate biosynthetic process	5.87888e-16	2.43521e-14	1.86839e-14	13
m16	BP	GO:0034030	ribonucleoside bisphosphate biosynthetic process	5.87888e-16	2.43521e-14	1.86839e-14	13
m16	BP	GO:0034033	purine nucleoside bisphosphate biosynthetic process	5.87888e-16	2.43521e-14	1.86839e-14	13
m16	BP	GO:0006099	tricarboxylic acid cycle	1.03697e-15	4.05332e-14	3.10986e-14	10
m16	BP	GO:0035384	thioester biosynthetic process	1.09142e-15	4.05332e-14	3.10986e-14	12
m16	BP	GO:0071616	acyl-CoA biosynthetic process	1.09142e-15	4.05332e-14	3.10986e-14	12
m16	BP	GO:0006790	sulfur compound metabolic process	1.36411e-15	4.89716e-14	3.75729e-14	22
m16	BP	GO:0072329	monocarboxylic acid catabolic process	1.55374e-15	5.398e-14	4.14155e-14	15
m16	BP	GO:0006101	citrate metabolic process	2.43436e-15	8.19315e-14	6.2861e-14	10
m16	BP	GO:0072350	tricarboxylic acid metabolic process	1.0998e-14	3.58933e-13	2.75388e-13	10
m16	BP	GO:0006520	cellular amino acid metabolic process	1.71633e-14	5.43674e-13	4.17127e-13	21
m16	BP	GO:1901605	alpha-amino acid metabolic process	2.62213e-14	8.06867e-13	6.19059e-13	17
m16	BP	GO:0072330	monocarboxylic acid biosynthetic process	3.72146e-14	1.11334e-12	8.54195e-13	20
m16	BP	GO:0009063	cellular amino acid catabolic process	3.82835e-14	1.11436e-12	8.54979e-13	14
m16	BP	GO:0006637	acyl-CoA metabolic process	5.19576e-14	1.43483e-12	1.10086e-12	13
m16	BP	GO:0035383	thioester metabolic process	5.19576e-14	1.43483e-12	1.10086e-12	13
m16	BP	GO:0006081	cellular aldehyde metabolic process	5.64635e-14	1.52028e-12	1.16642e-12	12
m16	BP	GO:0009062	fatty acid catabolic process	5.9958e-14	1.57499e-12	1.2084e-12	13
m16	BP	GO:0006090	pyruvate metabolic process	6.40344e-14	1.64202e-12	1.25982e-12	15
m16	BP	GO:0019362	pyridine nucleotide metabolic process	7.21919e-14	1.76706e-12	1.35576e-12	16
m16	BP	GO:0046496	nicotinamide nucleotide metabolic process	7.21919e-14	1.76706e-12	1.35576e-12	16
m16	BP	GO:0072524	pyridine-containing compound metabolic process	1.11232e-13	2.66215e-12	2.04251e-12	16
m16	BP	GO:0044272	sulfur compound biosynthetic process	1.83724e-13	4.30153e-12	3.3003e-12	16
m16	BP	GO:0009081	branched-chain amino acid metabolic process	4.03577e-13	9.05526e-12	6.94755e-12	8
m16	BP	GO:0009083	branched-chain amino acid catabolic process	4.03577e-13	9.05526e-12	6.94755e-12	8
m16	BP	GO:0009060	aerobic respiration	9.32035e-13	2.04857e-11	1.57175e-11	11
m16	BP	GO:1901570	fatty acid derivative biosynthetic process	2.00499e-12	4.31874e-11	3.3135e-11	12
m16	BP	GO:0044242	cellular lipid catabolic process	2.59905e-12	5.48858e-11	4.21105e-11	15
m16	BP	GO:0046950	cellular ketone body metabolic process	1.72197e-11	3.56646e-10	2.73632e-10	6
m16	BP	GO:1902224	ketone body metabolic process	3.76748e-11	7.6558e-10	5.87382e-10	6
m16	BP	GO:1901606	alpha-amino acid catabolic process	5.74933e-11	1.13363e-09	8.69761e-10	11
m16	BP	GO:0006085	acetyl-CoA biosynthetic process	5.78917e-11	1.13363e-09	8.69761e-10	7
m16	BP	GO:0034308	primary alcohol metabolic process	1.15929e-10	2.22957e-09	1.71061e-09	10
m16	BP	GO:0016042	lipid catabolic process	1.89175e-10	3.57441e-09	2.74242e-09	16
m16	BP	GO:0045333	cellular respiration	1.98857e-10	3.69257e-09	2.83308e-09	13
m16	BP	GO:0015980	energy derivation by oxidation of organic compounds	3.02821e-10	5.52777e-09	4.24112e-09	15
m16	BP	GO:0019395	fatty acid oxidation	6.83843e-10	1.2275e-08	9.41783e-09	10
m16	BP	GO:0034440	lipid oxidation	8.45666e-10	1.49309e-08	1.14555e-08	10
m16	BP	GO:1901615	organic hydroxy compound metabolic process	1.04547e-09	1.81609e-08	1.39337e-08	19
m16	BP	GO:0006066	alcohol metabolic process	1.12744e-09	1.92738e-08	1.47876e-08	16
m16	BP	GO:0006084	acetyl-CoA metabolic process	1.9891e-09	3.34729e-08	2.56817e-08	7
m16	BP	GO:0030258	lipid modification	6.88456e-09	1.14072e-07	8.75204e-08	12
m16	BP	GO:0043648	dicarboxylic acid metabolic process	7.14379e-09	1.16574e-07	8.94398e-08	9
m16	BP	GO:0006635	fatty acid beta-oxidation	1.42082e-08	2.28392e-07	1.75231e-07	8
m16	BP	GO:1901661	quinone metabolic process	2.21e-08	3.50025e-07	2.68552e-07	6
m16	BP	GO:0009144	purine nucleoside triphosphate metabolic process	3.58302e-08	5.59263e-07	4.29088e-07	14
m16	BP	GO:0006739	NADP metabolic process	4.3604e-08	6.70879e-07	5.14724e-07	6
m16	BP	GO:0005996	monosaccharide metabolic process	4.83737e-08	7.33781e-07	5.62985e-07	13
m16	BP	GO:0016052	carbohydrate catabolic process	5.04253e-08	7.54278e-07	5.78711e-07	11
m16	BP	GO:0009141	nucleoside triphosphate metabolic process	6.55892e-08	9.57904e-07	7.34941e-07	14
m16	BP	GO:0046949	fatty-acyl-CoA biosynthetic process	6.5817e-08	9.57904e-07	7.34941e-07	6
m16	BP	GO:0019318	hexose metabolic process	7.83592e-08	1.12524e-06	8.63326e-07	12
m16	BP	GO:0009205	purine ribonucleoside triphosphate metabolic process	2.07255e-07	2.93702e-06	2.25339e-06	13
m16	BP	GO:0009167	purine ribonucleoside monophosphate metabolic process	2.3114e-07	3.23296e-06	2.48045e-06	13
m16	BP	GO:0001676	long-chain fatty acid metabolic process	2.35297e-07	3.2489e-06	2.49268e-06	8
m16	BP	GO:0009126	purine nucleoside monophosphate metabolic process	2.39634e-07	3.26691e-06	2.5065e-06	13
m16	BP	GO:0009199	ribonucleoside triphosphate metabolic process	2.48406e-07	3.34417e-06	2.56578e-06	13
m16	BP	GO:0022900	electron transport chain	3.04176e-07	4.04441e-06	3.10303e-06	10
m16	BP	GO:0035337	fatty-acyl-CoA metabolic process	3.10779e-07	4.08181e-06	3.13172e-06	6
m16	BP	GO:0009161	ribonucleoside monophosphate metabolic process	3.78567e-07	4.91224e-06	3.76886e-06	13
m16	BP	GO:0046034	ATP metabolic process	5.63174e-07	7.2207e-06	5.54e-06	12
m16	BP	GO:0006633	fatty acid biosynthetic process	5.74099e-07	7.27417e-06	5.58103e-06	9
m16	BP	GO:1901569	fatty acid derivative catabolic process	6.30173e-07	7.89182e-06	6.0549e-06	4
m16	BP	GO:0009123	nucleoside monophosphate metabolic process	6.89168e-07	8.53143e-06	6.54564e-06	13
m16	BP	GO:0006069	ethanol oxidation	9.40325e-07	1.15083e-05	8.82961e-06	4
m16	BP	GO:0042866	pyruvate biosynthetic process	1.03978e-06	1.25825e-05	9.65378e-06	8
m16	BP	GO:0007031	peroxisome organization	1.13817e-06	1.36201e-05	1.04499e-05	7
m16	BP	GO:0006006	glucose metabolic process	1.24249e-06	1.4705e-05	1.12823e-05	10
m16	BP	GO:0051262	protein tetramerization	1.88704e-06	2.20906e-05	1.69488e-05	9
m16	BP	GO:0006103	2-oxoglutarate metabolic process	2.55264e-06	2.92467e-05	2.24392e-05	4
m16	BP	GO:0006577	amino-acid betaine metabolic process	2.55264e-06	2.92467e-05	2.24392e-05	4
m16	BP	GO:0006165	nucleoside diphosphate phosphorylation	2.64738e-06	3.00129e-05	2.30271e-05	8
m16	BP	GO:0009127	purine nucleoside monophosphate biosynthetic process	2.78389e-06	3.08286e-05	2.36529e-05	9
m16	BP	GO:0009168	purine ribonucleoside monophosphate biosynthetic process	2.78389e-06	3.08286e-05	2.36529e-05	9
m16	BP	GO:0006766	vitamin metabolic process	2.8052e-06	3.08286e-05	2.36529e-05	8
m16	BP	GO:0046434	organophosphate catabolic process	2.88537e-06	3.13893e-05	2.40831e-05	10
m16	BP	GO:0009142	nucleoside triphosphate biosynthetic process	2.91833e-06	3.14304e-05	2.41146e-05	9
m16	BP	GO:0046939	nucleotide phosphorylation	2.97095e-06	3.16803e-05	2.43063e-05	8
m16	BP	GO:0006086	acetyl-CoA biosynthetic process from pyruvate	3.38576e-06	3.57496e-05	2.74285e-05	4
m16	BP	GO:0019748	secondary metabolic process	4.1608e-06	4.35066e-05	3.338e-05	6
m16	BP	GO:0033559	unsaturated fatty acid metabolic process	4.48411e-06	4.64364e-05	3.56278e-05	7
m16	BP	GO:0009156	ribonucleoside monophosphate biosynthetic process	5.24541e-06	5.38029e-05	4.12797e-05	9
m16	BP	GO:0019359	nicotinamide nucleotide biosynthetic process	5.41639e-06	5.45182e-05	4.18285e-05	8
m16	BP	GO:0019363	pyridine nucleotide biosynthetic process	5.41639e-06	5.45182e-05	4.18285e-05	8
m16	BP	GO:0006690	icosanoid metabolic process	5.85391e-06	5.83765e-05	4.47887e-05	7
m16	BP	GO:0072525	pyridine-containing compound biosynthetic process	6.32236e-06	6.24696e-05	4.79291e-05	8
m16	BP	GO:0009124	nucleoside monophosphate biosynthetic process	7.35512e-06	7.20133e-05	5.52513e-05	9
m16	BP	GO:0009069	serine family amino acid metabolic process	9.01447e-06	8.73593e-05	6.70254e-05	5
m16	BP	GO:0042737	drug catabolic process	9.08472e-06	8.73593e-05	6.70254e-05	7
m16	BP	GO:0009132	nucleoside diphosphate metabolic process	9.38709e-06	8.94681e-05	6.86434e-05	8
m16	BP	GO:0008652	cellular amino acid biosynthetic process	9.86702e-06	9.32174e-05	7.15199e-05	6
m16	BP	GO:0006067	ethanol metabolic process	1.08467e-05	0.000101582	7.79375e-05	4
m16	BP	GO:0009145	purine nucleoside triphosphate biosynthetic process	1.30172e-05	0.000120858	9.27266e-05	8
m16	BP	GO:0009068	aspartate family amino acid catabolic process	1.3188e-05	0.000121397	9.31407e-05	4
m16	BP	GO:0034754	cellular hormone metabolic process	1.44631e-05	0.000132006	0.00010128	7
m16	BP	GO:0009066	aspartate family amino acid metabolic process	1.58229e-05	0.000143204	0.000109872	5
m16	BP	GO:0006720	isoprenoid metabolic process	1.80085e-05	0.00016029	0.000122981	7
m16	BP	GO:0046031	ADP metabolic process	1.80085e-05	0.00016029	0.000122981	7
m16	BP	GO:0006767	water-soluble vitamin metabolic process	2.21797e-05	0.0001958	0.000150225	6
m16	BP	GO:1901607	alpha-amino acid biosynthetic process	2.37146e-05	0.000207647	0.000159315	5
m16	BP	GO:0006575	cellular modified amino acid metabolic process	2.92736e-05	0.000254255	0.000195075	8
m16	BP	GO:0009135	purine nucleoside diphosphate metabolic process	3.31917e-05	0.00028371	0.000217674	7
m16	BP	GO:0009179	purine ribonucleoside diphosphate metabolic process	3.31917e-05	0.00028371	0.000217674	7
m16	BP	GO:0006563	L-serine metabolic process	3.48511e-05	0.000295548	0.000226756	3
m16	BP	GO:0009185	ribonucleoside diphosphate metabolic process	3.65284e-05	0.000307353	0.000235813	7
m16	BP	GO:0019373	epoxygenase P450 pathway	4.76839e-05	0.000395043	0.000303092	3
m16	BP	GO:0033539	fatty acid beta-oxidation using acyl-CoA dehydrogenase	4.76839e-05	0.000395043	0.000303092	3
m16	BP	GO:0016101	diterpenoid metabolic process	5.02083e-05	0.000412781	0.000316701	6
m16	BP	GO:0006691	leukotriene metabolic process	5.4124e-05	0.000441603	0.000338815	4
m16	BP	GO:0042133	neurotransmitter metabolic process	5.76194e-05	0.000466587	0.000357983	7
m16	BP	GO:0044262	cellular carbohydrate metabolic process	6.06654e-05	0.000487587	0.000374096	9
m16	BP	GO:0046365	monosaccharide catabolic process	6.15721e-05	0.000491209	0.000376874	5
m16	BP	GO:0006744	ubiquinone biosynthetic process	6.32651e-05	0.000497347	0.000381584	3
m16	BP	GO:1901663	quinone biosynthetic process	6.32651e-05	0.000497347	0.000381584	3
m16	BP	GO:0006754	ATP biosynthetic process	7.1407e-05	0.000557285	0.000427571	7
[truncated: 804 more rows]
