# Supplementary material for: Analysis of transcription factor- and ncRNA-mediated potential pathogenic gene modules in Alzheimer’s disease
Source: Aging (Albany NY). 2019 Aug 16;11(16):6109–19. doi: 10.18632/aging.102169 (PMC6738443; doi:10.18632/aging.102169)
Supplement: Supplementary Table 4 [file aging-11-102169-s003.xlsx]

## Sheet: S5
module	ID	Description	pvalue	p.adjust	qvalue	Count
m1	hsa05168	Herpes simplex virus 1 infection	1.26428e-17	2.71821e-15	1.54376e-15	58
m1	hsa04010	MAPK signaling pathway	2.95147e-17	3.17283e-15	1.80195e-15	44
m1	hsa04722	Neurotrophin signaling pathway	1.00506e-12	7.20296e-11	4.09079e-11	24
m1	hsa04914	Progesterone-mediated oocyte maturation	4.46228e-09	2.39848e-07	1.36217e-07	18
m1	hsa05203	Viral carcinogenesis	1.57884e-08	6.789e-07	3.85569e-07	25
m1	hsa05132	Salmonella infection	1.59625e-07	5.7199e-06	3.24851e-06	15
m1	hsa05142	Chagas disease (American trypanosomiasis)	3.23916e-07	9.94885e-06	5.65026e-06	16
m1	hsa04068	FoxO signaling pathway	4.43156e-07	1.19098e-05	6.76395e-06	18
m1	hsa04620	Toll-like receptor signaling pathway	2.01632e-06	4.33509e-05	2.46203e-05	15
m1	hsa04625	C-type lectin receptor signaling pathway	2.01632e-06	4.33509e-05	2.46203e-05	15
m1	hsa05161	Hepatitis B	9.70848e-06	0.000180539	0.000102534	18
m1	hsa05131	Shigellosis	1.00766e-05	0.000180539	0.000102534	11
m1	hsa04015	Rap1 signaling pathway	2.15695e-05	0.000356727	0.000202597	20
m1	hsa04380	Osteoclast differentiation	2.68389e-05	0.000412169	0.000234083	15
m1	hsa04810	Regulation of actin cytoskeleton	3.75142e-05	0.000537703	0.000305378	20
m1	hsa04211	Longevity regulating pathway	4.31792e-05	0.000580221	0.000329526	12
m1	hsa04658	Th1 and Th2 cell differentiation	6.02714e-05	0.000759726	0.000431472	12
m1	hsa04151	PI3K-Akt signaling pathway	6.52013e-05	0.000759726	0.000431472	27
m1	hsa04912	GnRH signaling pathway	6.71385e-05	0.000759726	0.000431472	12
m1	hsa04110	Cell cycle	7.54008e-05	0.000771961	0.000438421	14
m1	hsa04611	Platelet activation	7.54008e-05	0.000771961	0.000438421	14
m1	hsa04668	TNF signaling pathway	8.48448e-05	0.000829165	0.000470909	13
m1	hsa04218	Cellular senescence	0.000102481	0.000957973	0.000544063	16
m1	hsa04014	Ras signaling pathway	0.000116888	0.00104712	0.000594693	20
m1	hsa04926	Relaxin signaling pathway	0.000126261	0.00108585	0.000616686	14
m1	hsa05169	Epstein-Barr virus infection	0.00015936	0.00126922	0.000720832	18
m1	hsa05166	Human T-cell leukemia virus 1 infection	0.000159391	0.00126922	0.000720832	19
m1	hsa04540	Gap junction	0.000180165	0.00138341	0.000785683	11
m1	hsa04960	Aldosterone-regulated sodium reabsorption	0.000209194	0.00155092	0.000880816	7
m1	hsa04659	Th17 cell differentiation	0.000261699	0.00187551	0.00106516	12
m1	hsa04140	Autophagy - animal	0.00039263	0.00272308	0.00154652	13
m1	hsa05145	Toxoplasmosis	0.000435346	0.00292498	0.00166119	12
m1	hsa04062	Chemokine signaling pathway	0.000727981	0.00474291	0.00269365	16
m1	hsa04370	VEGF signaling pathway	0.000795561	0.00503075	0.00285712	8
m1	hsa05140	Leishmaniasis	0.00085097	0.00506432	0.00287618	9
m1	hsa04024	cAMP signaling pathway	0.000871533	0.00506432	0.00287618	17
m1	hsa05170	Human immunodeficiency virus 1 infection	0.000871533	0.00506432	0.00287618	17
m1	hsa05133	Pertussis	0.00103391	0.00584976	0.00332226	9
m1	hsa04213	Longevity regulating pathway - multiple species	0.00111095	0.00599724	0.00340602	8
m1	hsa05152	Tuberculosis	0.00111577	0.00599724	0.00340602	15
m1	hsa04657	IL-17 signaling pathway	0.00117742	0.00617426	0.00350656	10
m1	hsa04261	Adrenergic signaling in cardiomyocytes	0.00128217	0.00656351	0.00372763	13
m1	hsa04022	cGMP-PKG signaling pathway	0.00152586	0.00762928	0.00433291	14
m1	hsa05221	Acute myeloid leukemia	0.00167874	0.00820293	0.0046587	8
m1	hsa01522	Endocrine resistance	0.001759	0.00840412	0.00477296	10
m1	hsa05120	Epithelial cell signaling in Helicobacter pylori infection	0.00203788	0.00937131	0.00532226	8
m1	hsa04750	Inflammatory mediator regulation of TRP channels	0.00204861	0.00937131	0.00532226	10
m1	hsa04210	Apoptosis	0.00223669	0.0100185	0.00568984	12
m1	hsa04071	Sphingolipid signaling pathway	0.0023435	0.0101502	0.00576461	11
m1	hsa04371	Apelin signaling pathway	0.00237893	0.0101502	0.00576461	12
m1	hsa04622	RIG-I-like receptor signaling pathway	0.00245493	0.0101502	0.00576461	8
m1	hsa04917	Prolactin signaling pathway	0.00245493	0.0101502	0.00576461	8
m1	hsa04152	AMPK signaling pathway	0.00250409	0.0101581	0.0057691	11
m1	hsa04392	Hippo signaling pathway - multiple species	0.00266773	0.0106215	0.0060323	5
m1	hsa04621	NOD-like receptor signaling pathway	0.00293235	0.0114628	0.00651009	14
m1	hsa04360	Axon guidance	0.00341472	0.0129221	0.00733885	14
m1	hsa04114	Oocyte meiosis	0.00344601	0.0129221	0.00733885	11
m1	hsa05205	Proteoglycans in cancer	0.00348595	0.0129221	0.00733885	15
m1	hsa04931	Insulin resistance	0.00361441	0.0130962	0.00743777	10
m1	hsa04666	Fc gamma R-mediated phagocytosis	0.00365476	0.0130962	0.00743777	9
m1	hsa05163	Human cytomegalovirus infection	0.00416608	0.0146837	0.00833935	16
m1	hsa05167	Kaposi sarcoma-associated herpesvirus infection	0.00436174	0.0151254	0.00859019	14
m1	hsa04670	Leukocyte transendothelial migration	0.00469238	0.0160137	0.00909468	10
m1	hsa04728	Dopaminergic synapse	0.00493069	0.016564	0.00940724	11
m1	hsa04530	Tight junction	0.00519151	0.0171719	0.00975247	13
m1	hsa04961	Endocrine and other factor-regulated calcium reabsorption	0.00542099	0.0176593	0.0100293	6
m1	hsa04933	AGE-RAGE signaling pathway in diabetic complications	0.00681042	0.0218543	0.0124118	9
m1	hsa04660	T cell receptor signaling pathway	0.00726074	0.0229568	0.0130379	9
m1	hsa04720	Long-term potentiation	0.00743009	0.0231517	0.0131486	7
m1	hsa04550	Signaling pathways regulating pluripotency of stem cells	0.00765295	0.0231744	0.0131615	11
m1	hsa05418	Fluid shear stress and atherosclerosis	0.00765295	0.0231744	0.0131615	11
m1	hsa04510	Focal adhesion	0.00784916	0.0234385	0.0133114	14
m1	hsa04664	Fc epsilon RI signaling pathway	0.00804887	0.0237056	0.0134631	7
m1	hsa05034	Alcoholism	0.00830368	0.0241255	0.0137017	13
m1	hsa04928	Parathyroid hormone synthesis, secretion and action	0.00986305	0.0282741	0.0160577	9
m1	hsa04662	B cell receptor signaling pathway	0.0101334	0.0286669	0.0162809	7
m1	hsa05134	Legionellosis	0.0105145	0.0293586	0.0166737	6
m1	hsa04520	Adherens junction	0.0109085	0.0300684	0.0170768	7
m1	hsa05032	Morphine addiction	0.0120071	0.0326775	0.0185586	8
m1	hsa00230	Purine metabolism	0.012986	0.0348999	0.0198207	10
m1	hsa04971	Gastric acid secretion	0.0134918	0.0358116	0.0203385	7
m1	hsa04150	mTOR signaling pathway	0.015085	0.0390756	0.0221923	11
m1	hsa04921	Oxytocin signaling pathway	0.015085	0.0390756	0.0221923	11
m1	hsa04730	Long-term depression	0.0157821	0.0403948	0.0229415	6
m1	hsa05146	Amoebiasis	0.0162157	0.0410162	0.0232944	8
m1	hsa05215	Prostate cancer	0.0171711	0.0429277	0.02438	8
m1	hsa01521	EGFR tyrosine kinase inhibitor resistance	0.0175827	0.0434515	0.0246775	7
m1	hsa05162	Measles	0.0190513	0.0465458	0.0264348	10
m1	hsa04930	Type II diabetes mellitus	0.0192911	0.0466021	0.0264668	5
m1	hsa05230	Central carbon metabolism in cancer	0.0226435	0.0540928	0.030721	6
m1	hsa05030	Cocaine addiction	0.0247297	0.0584274	0.0331827	5
m1	hsa04714	Thermogenesis	0.025892	0.0605085	0.0343647	14
m1	hsa05014	Amyotrophic lateral sclerosis (ALS)	0.0288523	0.0667015	0.0378819	5
m1	hsa04920	Adipocytokine signaling pathway	0.0293996	0.0672437	0.0381898	6
m1	hsa04270	Vascular smooth muscle contraction	0.03578	0.0809757	0.0459887	9
m1	hsa04923	Regulation of lipolysis in adipocytes	0.0383386	0.0843495	0.0479047	5
m1	hsa05130	Pathogenic Escherichia coli infection	0.0383386	0.0843495	0.0479047	5
m1	hsa05160	Hepatitis C	0.0384477	0.0843495	0.0479047	10
m1	hsa04925	Aldosterone synthesis and secretion	0.0490431	0.106508	0.0604891	7
m1	hsa04066	HIF-1 signaling pathway	0.0536495	0.115346	0.0655088	7
m1	hsa04072	Phospholipase D signaling pathway	0.0651867	0.138764	0.0788083	9
m1	hsa04932	Non-alcoholic fatty liver disease (NAFLD)	0.0674174	0.142105	0.080706	9
m1	hsa04137	Mitophagy - animal	0.069562	0.145202	0.0824649	5
m1	hsa05223	Non-small cell lung cancer	0.0732783	0.151489	0.0860353	5
m1	hsa04390	Hippo signaling pathway	0.0792863	0.162348	0.0922026	9
m1	hsa04913	Ovarian steroidogenesis	0.0843436	0.171074	0.0971584	4
m1	hsa04725	Cholinergic synapse	0.0868515	0.173319	0.0984332	7
m1	hsa04710	Circadian rhythm	0.0870625	0.173319	0.0984332	3
m1	hsa04910	Insulin signaling pathway	0.0949877	0.187361	0.106408	8
m1	hsa04919	Thyroid hormone signaling pathway	0.10004	0.195179	0.110848	7
m1	hsa04217	Necroptosis	0.100767	0.195179	0.110848	9
m1	hsa01524	Platinum drug resistance	0.102227	0.196239	0.11145	5
m1	hsa00562	Inositol phosphate metabolism	0.106769	0.199611	0.113365	5
m1	hsa04918	Thyroid hormone synthesis	0.106769	0.199611	0.113365	5
m1	hsa05100	Bacterial invasion of epithelial cells	0.106769	0.199611	0.113365	5
m1	hsa05212	Pancreatic cancer	0.111408	0.206489	0.117272	5
m1	hsa05164	Influenza A	0.115736	0.212678	0.120786	9
m1	hsa04070	Phosphatidylinositol signaling system	0.120656	0.219839	0.124853	6
m1	hsa03030	DNA replication	0.122542	0.221399	0.12574	3
m1	hsa04064	NF-kappa B signaling pathway	0.124933	0.223838	0.127125	6
m1	hsa05224	Breast cancer	0.127911	0.22728	0.12908	8
m1	hsa04723	Retrograde endocannabinoid signaling	0.131496	0.231734	0.131609	8
m1	hsa04922	Glucagon signaling pathway	0.1382	0.241569	0.137195	6
m1	hsa04911	Insulin secretion	0.168402	0.291988	0.165829	5
m1	hsa04964	Proximal tubule bicarbonate reclamation	0.183426	0.315493	0.179178	2
m1	hsa04962	Vasopressin-regulated water reabsorption	0.187816	0.317957	0.180578	3
m1	hsa04973	Carbohydrate digestion and absorption	0.187816	0.317957	0.180578	3
m1	hsa04915	Estrogen signaling pathway	0.190049	0.319222	0.181296	7
m1	hsa04724	Glutamatergic synapse	0.191977	0.319962	0.181717	6
m1	hsa05414	Dilated cardiomyopathy (DCM)	0.197468	0.326581	0.185476	5
m1	hsa05031	Amphetamine addiction	0.200336	0.328796	0.186733	4
m1	hsa04340	Hedgehog signaling pathway	0.214255	0.348975	0.198194	3
m1	hsa04115	p53 signaling pathway	0.229125	0.364902	0.20724	4
m1	hsa04976	Bile secretion	0.229125	0.364902	0.20724	4
m1	hsa05218	Melanoma	0.229125	0.364902	0.20724	4
m1	hsa05165	Human papillomavirus infection	0.233494	0.367866	0.208923	14
m1	hsa04713	Circadian entrainment	0.234408	0.367866	0.208923	5
m1	hsa05214	Glioma	0.251357	0.391607	0.222406	4
m1	hsa05220	Chronic myeloid leukemia	0.258869	0.399351	0.226804	4
m1	hsa04916	Melanogenesis	0.260043	0.399351	0.226804	5
m1	hsa04260	Cardiac muscle contraction	0.274021	0.417481	0.237101	4
m1	hsa04934	Cushing syndrome	0.275732	0.417481	0.237101	7
m1	hsa05202	Transcriptional misregulation in cancer	0.299438	0.450204	0.255685	8
m1	hsa04020	Calcium signaling pathway	0.309528	0.459875	0.261177	8
m1	hsa03410	Base excision repair	0.310148	0.459875	0.261177	2
m1	hsa05213	Endometrial cancer	0.315934	0.465245	0.264227	3
m1	hsa04120	Ubiquitin mediated proteolysis	0.323254	0.472787	0.268511	6
m1	hsa04012	ErbB signaling pathway	0.328007	0.473299	0.268801	4
m1	hsa05410	Hypertrophic cardiomyopathy (HCM)	0.328007	0.473299	0.268801	4
m1	hsa05020	Prion diseases	0.335386	0.48072	0.273016	2
m1	hsa04623	Cytosolic DNA-sensing pathway	0.362904	0.516717	0.29346	3
m1	hsa04970	Salivary secretion	0.366983	0.519088	0.294807	4
m1	hsa04927	Cortisol synthesis and secretion	0.381581	0.532726	0.302552	3
m1	hsa05321	Inflammatory bowel disease (IBD)	0.381581	0.532726	0.302552	3
m1	hsa03440	Homologous recombination	0.409148	0.567528	0.322317	2
m1	hsa04924	Renin secretion	0.418537	0.576829	0.3276	3
m1	hsa00730	Thiamine metabolism	0.4256	0.582828	0.331006	1
m1	hsa04972	Pancreatic secretion	0.428964	0.583716	0.331511	4
m1	hsa05231	Choline metabolism in cancer	0.43662	0.590397	0.335305	4
m1	hsa00450	Selenocompound metabolism	0.445184	0.598216	0.339746	1
m1	hsa04310	Wnt signaling pathway	0.451459	0.60288	0.342395	6
m1	hsa05322	Systemic lupus erythematosus	0.475242	0.630722	0.358207	5
m1	hsa03420	Nucleotide excision repair	0.478724	0.631445	0.358618	2
m1	hsa05144	Malaria	0.50079	0.656524	0.372861	2
m1	hsa05110	Vibrio cholerae infection	0.511597	0.666627	0.378598	2
m1	hsa04978	Mineral absorption	0.52225	0.676408	0.384154	2
m1	hsa05010	Alzheimer disease	0.528525	0.680437	0.386442	6
m1	hsa04512	ECM-receptor interaction	0.532424	0.681376	0.386975	3
m1	hsa03430	Mismatch repair	0.549481	0.699043	0.397009	1
m1	hsa05210	Colorectal cancer	0.564908	0.714443	0.405755	3
m1	hsa00592	alpha-Linolenic acid metabolism	0.579706	0.728871	0.413949	1
m1	hsa04727	GABAergic synapse	0.588353	0.730374	0.414802	3
m1	hsa00790	Folate biosynthesis	0.594053	0.730374	0.414802	1
m1	hsa04144	Endocytosis	0.594134	0.730374	0.414802	8
m1	hsa04145	Phagosome	0.59449	0.730374	0.414802	5
m1	hsa05416	Viral myocarditis	0.601736	0.735075	0.417472	2
m1	hsa05222	Small cell lung cancer	0.61833	0.751079	0.426561	3
m1	hsa00591	Linoleic acid metabolism	0.63423	0.766065	0.435072	1
m1	hsa00564	Glycerophospholipid metabolism	0.646801	0.772568	0.438766	3
m1	hsa04640	Hematopoietic cell lineage	0.646801	0.772568	0.438766	3
m1	hsa04630	JAK-STAT signaling pathway	0.650879	0.773143	0.439092	5
m1	hsa01523	Antifolate resistance	0.658789	0.77824	0.441987	1
m1	hsa04141	Protein processing in endoplasmic reticulum	0.666799	0.783397	0.444916	5
m1	hsa04136	Autophagy - other	0.670445	0.7834	0.444918	1
m1	hsa04215	Apoptosis - multiple species	0.681704	0.792251	0.449944	1
m1	hsa05211	Renal cell carcinoma	0.686561	0.793605	0.450713	2
m1	hsa05206	MicroRNAs in cancer	0.695073	0.799148	0.453862	9
m1	hsa00250	Alanine, aspartate and glutamate metabolism	0.713234	0.813889	0.462233	1
m1	hsa05143	African trypanosomiasis	0.723036	0.813889	0.462233	1
m1	hsa05216	Thyroid cancer	0.723036	0.813889	0.462233	1
m1	hsa05340	Primary immunodeficiency	0.723036	0.813889	0.462233	1
m1	hsa04726	Serotonergic synapse	0.756056	0.845539	0.480208	3
m1	hsa05219	Bladder cancer	0.759019	0.845539	0.480208	1
m1	hsa04940	Type I diabetes mellitus	0.775223	0.859139	0.487932	1
m1	hsa00565	Ether lipid metabolism	0.804447	0.886954	0.503729	1
m1	hsa04330	Notch signaling pathway	0.811141	0.889772	0.505329	1
m1	hsa04974	Protein digestion and absorption	0.81673	0.891355	0.506229	2
m1	hsa05323	Rheumatoid arthritis	0.821521	0.891604	0.50637	2
m1	hsa04650	Natural killer cell mediated cytotoxicity	0.82879	0.891604	0.50637	3
m1	hsa05225	Hepatocellular carcinoma	0.829399	0.891604	0.50637	4
m1	hsa00240	Pyrimidine metabolism	0.86199	0.922029	0.523649	1
m1	hsa05012	Parkinson disease	0.867321	0.923139	0.52428	3
m1	hsa05226	Gastric cancer	0.887682	0.935941	0.53155	3
m1	hsa00590	Arachidonic acid metabolism	0.888056	0.935941	0.53155	1
m1	hsa05412	Arrhythmogenic right ventricular cardiomyopathy (ARVC)	0.918247	0.963039	0.54694	1
m1	hsa04612	Antigen processing and presentation	0.931356	0.9698	0.55078	1
m1	hsa04721	Synaptic vesicle cycle	0.933714	0.9698	0.55078	1
m1	hsa04742	Taste transduction	0.944351	0.976132	0.554376	1
m1	hsa03015	mRNA surveillance pathway	0.957945	0.981286	0.557303	1
m1	hsa04350	TGF-beta signaling pathway	0.959393	0.981286	0.557303	1
m1	hsa05016	Huntington disease	0.96303	0.981286	0.557303	3
m1	hsa04142	Lysosome	0.986323	0.999998	0.56793	1
m1	hsa03013	RNA transport	0.996891	0.999998	0.56793	1
m1	hsa04080	Neuroactive ligand-receptor interaction	0.999994	0.999998	0.56793	1
m1	hsa04740	Olfactory transduction	0.999998	0.999998	0.56793	2
m2	hsa00061	Fatty acid biosynthesis	0.0182124	0.207822	0.187509	1
m2	hsa04330	Notch signaling pathway	0.0479219	0.207822	0.187509	1
m2	hsa03018	RNA degradation	0.0777923	0.207822	0.187509	1
m2	hsa04911	Insulin secretion	0.0844226	0.207822	0.187509	1
m2	hsa05032	Morphine addiction	0.089133	0.207822	0.187509	1
m2	hsa04926	Relaxin signaling pathway	0.125152	0.207822	0.187509	1
m2	hsa04068	FoxO signaling pathway	0.126965	0.207822	0.187509	1
m2	hsa04270	Vascular smooth muscle contraction	0.126965	0.207822	0.187509	1
m2	hsa04022	cGMP-PKG signaling pathway	0.157288	0.207822	0.187509	1
m2	hsa05010	Alzheimer disease	0.161668	0.207822	0.187509	1
m2	hsa05202	Transcriptional misregulation in cancer	0.174691	0.207822	0.187509	1
m2	hsa04062	Chemokine signaling pathway	0.178133	0.207822	0.187509	1
m2	hsa04144	Endocytosis	0.223394	0.240578	0.217063	1
m2	hsa04080	Neuroactive ligand-receptor interaction	0.296996	0.296996	0.267966	1
m3	hsa04146	Peroxisome	0.000357783	0.057603	0.057603	6
m3	hsa00450	Selenocompound metabolism	0.0158203	0.939789	0.939789	2
m3	hsa00053	Ascorbate and aldarate metabolism	0.0379257	0.939789	0.939789	2
m3	hsa00410	beta-Alanine metabolism	0.0487911	0.939789	0.939789	2
m3	hsa04060	Cytokine-cytokine receptor interaction	0.0513286	0.939789	0.939789	7
m3	hsa04012	ErbB signaling pathway	0.0736679	0.939789	0.939789	3
m3	hsa00380	Tryptophan metabolism	0.083388	0.939789	0.939789	2
m3	hsa04974	Protein digestion and absorption	0.0841903	0.939789	0.939789	3
m3	hsa00330	Arginine and proline metabolism	0.111986	0.939789	0.939789	2
m3	hsa00561	Glycerolipid metabolism	0.15464	0.939789	0.939789	2
m3	hsa00603	Glycosphingolipid biosynthesis - globo and isoglobo series	0.159022	0.939789	0.939789	1
m3	hsa00604	Glycosphingolipid biosynthesis - ganglio series	0.159022	0.939789	0.939789	1
m3	hsa04062	Chemokine signaling pathway	0.173623	0.939789	0.939789	4
m3	hsa00120	Primary bile acid biosynthesis	0.17824	0.939789	0.939789	1
m3	hsa00360	Phenylalanine metabolism	0.17824	0.939789	0.939789	1
m3	hsa05150	Staphylococcus aureus infection	0.183182	0.939789	0.939789	2
m3	hsa01210	2-Oxocarboxylic acid metabolism	0.187686	0.939789	0.939789	1
m3	hsa04080	Neuroactive ligand-receptor interaction	0.191067	0.939789	0.939789	6
m3	hsa04917	Prolactin signaling pathway	0.191478	0.939789	0.939789	2
m3	hsa00100	Steroid biosynthesis	0.197024	0.939789	0.939789	1
m3	hsa00531	Glycosaminoglycan degradation	0.197024	0.939789	0.939789	1
m3	hsa00670	One carbon pool by folate	0.206256	0.939789	0.939789	1
m3	hsa03320	PPAR signaling pathway	0.208214	0.939789	0.939789	2
m3	hsa05100	Bacterial invasion of epithelial cells	0.208214	0.939789	0.939789	2
m3	hsa01230	Biosynthesis of amino acids	0.212423	0.939789	0.939789	2
m3	hsa01521	EGFR tyrosine kinase inhibitor resistance	0.229339	0.939789	0.939789	2
m3	hsa03018	RNA degradation	0.229339	0.939789	0.939789	2
m3	hsa04610	Complement and coagulation cascades	0.229339	0.939789	0.939789	2
m3	hsa00340	Histidine metabolism	0.233327	0.939789	0.939789	1
m3	hsa04614	Renin-angiotensin system	0.233327	0.939789	0.939789	1
m3	hsa00534	Glycosaminoglycan biosynthesis - heparan sulfate / heparin	0.242146	0.939789	0.939789	1
m3	hsa04977	Vitamin digestion and absorption	0.242146	0.939789	0.939789	1
m3	hsa00601	Glycosphingolipid biosynthesis - lacto and neolacto series	0.268005	0.939789	0.939789	1
m3	hsa03015	mRNA surveillance pathway	0.280471	0.939789	0.939789	2
m3	hsa04392	Hippo signaling pathway - multiple species	0.284759	0.939789	0.939789	1
m3	hsa00020	Citrate cycle (TCA cycle)	0.292992	0.939789	0.939789	1
m3	hsa00030	Pentose phosphate pathway	0.292992	0.939789	0.939789	1
m3	hsa00760	Nicotinate and nicotinamide metabolism	0.292992	0.939789	0.939789	1
m3	hsa05146	Amoebiasis	0.301768	0.939789	0.939789	2
m3	hsa04640	Hematopoietic cell lineage	0.306017	0.939789	0.939789	2
m3	hsa04136	Autophagy - other	0.30918	0.939789	0.939789	1
m3	hsa03410	Base excision repair	0.317135	0.939789	0.939789	1
m3	hsa00350	Tyrosine metabolism	0.340463	0.939789	0.939789	1
m3	hsa00500	Starch and sucrose metabolism	0.340463	0.939789	0.939789	1
m3	hsa04360	Axon guidance	0.344182	0.939789	0.939789	3
m3	hsa04960	Aldosterone-regulated sodium reabsorption	0.348062	0.939789	0.939789	1
m3	hsa05143	African trypanosomiasis	0.348062	0.939789	0.939789	1
m3	hsa05340	Primary immunodeficiency	0.348062	0.939789	0.939789	1
m3	hsa05202	Transcriptional misregulation in cancer	0.359944	0.939789	0.939789	3
m3	hsa00620	Pyruvate metabolism	0.363002	0.939789	0.939789	1
m3	hsa04020	Calcium signaling pathway	0.366236	0.939789	0.939789	3
m3	hsa00260	Glycine, serine and threonine metabolism	0.370345	0.939789	0.939789	1
m3	hsa00860	Porphyrin and chlorophyll metabolism	0.384779	0.939789	0.939789	1
m3	hsa01200	Carbon metabolism	0.385432	0.939789	0.939789	2
m3	hsa04940	Type I diabetes mellitus	0.391873	0.939789	0.939789	1
m3	hsa00071	Fatty acid degradation	0.398887	0.939789	0.939789	1
m3	hsa03022	Basal transcription factors	0.40582	0.939789	0.939789	1
m3	hsa04142	Lysosome	0.413772	0.939789	0.939789	2
m3	hsa00270	Cysteine and methionine metabolism	0.41945	0.939789	0.939789	1
m3	hsa00565	Ether lipid metabolism	0.41945	0.939789	0.939789	1
m3	hsa00600	Sphingolipid metabolism	0.41945	0.939789	0.939789	1
m3	hsa00280	Valine, leucine and isoleucine degradation	0.426149	0.939789	0.939789	1
m3	hsa04672	Intestinal immune network for IgA production	0.432771	0.939789	0.939789	1
m3	hsa05144	Malaria	0.432771	0.939789	0.939789	1
m3	hsa04380	Osteoclast differentiation	0.433624	0.939789	0.939789	2
m3	hsa04979	Cholesterol metabolism	0.439318	0.939789	0.939789	1
m3	hsa04923	Regulation of lipolysis in adipocytes	0.470946	0.939789	0.939789	1
m3	hsa05130	Pathogenic Escherichia coli infection	0.470946	0.939789	0.939789	1
m3	hsa04915	Estrogen signaling pathway	0.472236	0.939789	0.939789	2
m3	hsa00480	Glutathione metabolism	0.477057	0.939789	0.939789	1
m3	hsa00310	Lysine degradation	0.494974	0.939789	0.939789	1
m3	hsa04370	VEGF signaling pathway	0.494974	0.939789	0.939789	1
m3	hsa05416	Viral myocarditis	0.494974	0.939789	0.939789	1
m3	hsa04514	Cell adhesion molecules (CAMs)	0.501989	0.939789	0.939789	2
m3	hsa00590	Arachidonic acid metabolism	0.517921	0.939789	0.939789	1
m3	hsa04623	Cytosolic DNA-sensing pathway	0.517921	0.939789	0.939789	1
m3	hsa05131	Shigellosis	0.529005	0.939789	0.939789	1
m3	hsa05230	Central carbon metabolism in cancer	0.529005	0.939789	0.939789	1
m3	hsa00010	Glycolysis / Gluconeogenesis	0.545161	0.939789	0.939789	1
m3	hsa04920	Adipocytokine signaling pathway	0.550423	0.939789	0.939789	1
m3	hsa04622	RIG-I-like receptor signaling pathway	0.555625	0.939789	0.939789	1
m3	hsa04630	JAK-STAT signaling pathway	0.558217	0.939789	0.939789	2
m3	hsa04520	Adherens junction	0.565851	0.939789	0.939789	1
m3	hsa04976	Bile secretion	0.565851	0.939789	0.939789	1
m3	hsa05412	Arrhythmogenic right ventricular cardiomyopathy (ARVC)	0.565851	0.939789	0.939789	1
m3	hsa04918	Thyroid hormone synthesis	0.575845	0.939789	0.939789	1
m3	hsa05214	Glioma	0.580756	0.939789	0.939789	1
m3	hsa04151	PI3K-Akt signaling pathway	0.584062	0.939789	0.939789	4
m3	hsa00980	Metabolism of xenobiotics by cytochrome P450	0.585611	0.939789	0.939789	1
m3	hsa05133	Pertussis	0.585611	0.939789	0.939789	1
m3	hsa05220	Chronic myeloid leukemia	0.585611	0.939789	0.939789	1
m3	hsa04721	Synaptic vesicle cycle	0.595154	0.939789	0.939789	1
m3	hsa04512	ECM-receptor interaction	0.613594	0.939789	0.939789	1
m3	hsa05204	Chemical carcinogenesis	0.613594	0.939789	0.939789	1
m3	hsa05410	Hypertrophic cardiomyopathy (HCM)	0.626876	0.939789	0.939789	1
m3	hsa05132	Salmonella infection	0.631203	0.939789	0.939789	1
m3	hsa05210	Colorectal cancer	0.631203	0.939789	0.939789	1
m3	hsa04727	GABAergic synapse	0.643886	0.939789	0.939789	1
m3	hsa04666	Fc gamma R-mediated phagocytosis	0.652101	0.939789	0.939789	1
m3	hsa05032	Morphine addiction	0.652101	0.939789	0.939789	1
m3	hsa05414	Dilated cardiomyopathy (DCM)	0.652101	0.939789	0.939789	1
m3	hsa04657	IL-17 signaling pathway	0.660129	0.939789	0.939789	1
m3	hsa04510	Focal adhesion	0.670606	0.939789	0.939789	2
m3	hsa00564	Glycerophospholipid metabolism	0.675639	0.939789	0.939789	1
m3	hsa01522	Endocrine resistance	0.679406	0.939789	0.939789	1
m3	hsa05231	Choline metabolism in cancer	0.683129	0.939789	0.939789	1
m3	hsa04064	NF-kappa B signaling pathway	0.68681	0.939789	0.939789	1
m3	hsa04066	HIF-1 signaling pathway	0.68681	0.939789	0.939789	1
m3	hsa04922	Glucagon signaling pathway	0.6976	0.939789	0.939789	1
m3	hsa05142	Chagas disease (American trypanosomiasis)	0.6976	0.939789	0.939789	1
m3	hsa04625	C-type lectin receptor signaling pathway	0.701115	0.939789	0.939789	1
m3	hsa04024	cAMP signaling pathway	0.704286	0.939789	0.939789	2
m3	hsa04931	Insulin resistance	0.714773	0.939789	0.939789	1
m3	hsa04668	TNF signaling pathway	0.721369	0.939789	0.939789	1
m3	hsa04071	Sphingolipid signaling pathway	0.749232	0.939789	0.939789	1
m3	hsa04722	Neurotrophin signaling pathway	0.749232	0.939789	0.939789	1
m3	hsa04611	Platelet activation	0.763502	0.939789	0.939789	1
m3	hsa04140	Autophagy - animal	0.774337	0.939789	0.939789	1
m3	hsa04144	Endocytosis	0.77524	0.939789	0.939789	2
m3	hsa04926	Relaxin signaling pathway	0.779569	0.939789	0.939789	1
m3	hsa04650	Natural killer cell mediated cytotoxicity	0.782139	0.939789	0.939789	1
m3	hsa04728	Dopaminergic synapse	0.782139	0.939789	0.939789	1
m3	hsa04270	Vascular smooth muscle contraction	0.784681	0.939789	0.939789	1
m3	hsa03040	Spliceosome	0.789675	0.939789	0.939789	1
m3	hsa04210	Apoptosis	0.794555	0.939789	0.939789	1
m3	hsa04120	Ubiquitin mediated proteolysis	0.796953	0.939789	0.939789	1
m3	hsa04371	Apelin signaling pathway	0.796953	0.939789	0.939789	1
m3	hsa04910	Insulin signaling pathway	0.796953	0.939789	0.939789	1
m3	hsa04550	Signaling pathways regulating pluripotency of stem cells	0.801666	0.939789	0.939789	1
m3	hsa05012	Parkinson disease	0.808534	0.939789	0.939789	1
m3	hsa04261	Adrenergic signaling in cardiomyocytes	0.815166	0.939789	0.939789	1
m3	hsa05224	Breast cancer	0.819461	0.939789	0.939789	1
m3	hsa04072	Phospholipase D signaling pathway	0.821571	0.939789	0.939789	1
m3	hsa04932	Non-alcoholic fatty liver disease (NAFLD)	0.823657	0.939789	0.939789	1
m3	hsa05226	Gastric cancer	0.823657	0.939789	0.939789	1
m3	hsa04145	Phagosome	0.82977	0.939789	0.939789	1
m3	hsa04150	mTOR signaling pathway	0.831761	0.939789	0.939789	1
m3	hsa04921	Oxytocin signaling pathway	0.831761	0.939789	0.939789	1
m3	hsa04390	Hippo signaling pathway	0.833729	0.939789	0.939789	1
m3	hsa05160	Hepatitis C	0.835675	0.939789	0.939789	1
m3	hsa04310	Wnt signaling pathway	0.841376	0.939789	0.939789	1
m3	hsa03013	RNA transport	0.85393	0.939789	0.939789	1
m3	hsa04141	Protein processing in endoplasmic reticulum	0.85393	0.939789	0.939789	1
m3	hsa04022	cGMP-PKG signaling pathway	0.855641	0.939789	0.939789	1
m3	hsa05164	Influenza A	0.857333	0.939789	0.939789	1
m3	hsa05225	Hepatocellular carcinoma	0.859005	0.939789	0.939789	1
m3	hsa04530	Tight junction	0.862291	0.939789	0.939789	1
m3	hsa05010	Alzheimer disease	0.863905	0.939789	0.939789	1
m3	hsa04621	NOD-like receptor signaling pathway	0.874694	0.941976	0.941976	1
m3	hsa05034	Alcoholism	0.877618	0.941976	0.941976	1
m3	hsa05165	Human papillomavirus infection	0.897741	0.957194	0.957194	2
m3	hsa04015	Rap1 signaling pathway	0.910016	0.957701	0.957701	1
m3	hsa05170	Human immunodeficiency virus 1 infection	0.916193	0.957701	0.957701	1
m3	hsa04810	Regulation of actin cytoskeleton	0.918157	0.957701	0.957701	1
m3	hsa05163	Human cytomegalovirus infection	0.928174	0.957701	0.957701	1
m3	hsa04714	Thermogenesis	0.933116	0.957701	0.957701	1
m3	hsa04014	Ras signaling pathway	0.933907	0.957701	0.957701	1
m3	hsa04010	MAPK signaling pathway	0.968845	0.982509	0.982509	1
m3	hsa05206	MicroRNAs in cancer	0.970304	0.982509	0.982509	1
m3	hsa05168	Herpes simplex virus 1 infection	0.979813	0.985937	0.985937	2
m3	hsa04740	Olfactory transduction	0.995117	0.995117	0.995117	1
m4	hsa04120	Ubiquitin mediated proteolysis	1.21128e-16	1.93805e-15	1.53004e-15	10
m4	hsa04914	Progesterone-mediated oocyte maturation	0.00957767	0.0598694	0.0472653	2
m4	hsa04110	Cell cycle	0.0147404	0.0598694	0.0472653	2
m4	hsa04114	Oocyte meiosis	0.0149673	0.0598694	0.0472653	2
m4	hsa04012	ErbB signaling pathway	0.122596	0.286425	0.226125	1
m4	hsa04660	T cell receptor signaling pathway	0.14407	0.286425	0.226125	1
m4	hsa04625	C-type lectin receptor signaling pathway	0.148042	0.286425	0.226125	1
m4	hsa04068	FoxO signaling pathway	0.184311	0.286425	0.226125	1
m4	hsa04910	Insulin signaling pathway	0.190636	0.286425	0.226125	1
m4	hsa05162	Measles	0.191896	0.286425	0.226125	1
m4	hsa05012	Parkinson disease	0.196917	0.286425	0.226125	1
m4	hsa04141	Protein processing in endoplasmic reticulum	0.225236	0.300315	0.237091	1
m4	hsa05203	Viral carcinogenesis	0.267729	0.329331	0.259998	1
m4	hsa05166	Human T-cell leukemia virus 1 infection	0.288165	0.329331	0.259998	1
m4	hsa04144	Endocytosis	0.315681	0.336726	0.265836	1
m4	hsa05165	Human papillomavirus infection	0.403061	0.403061	0.318206	1
m5	hsa03008	Ribosome biogenesis in eukaryotes	1.12005e-14	2.01609e-13	1.2969e-13	12
m5	hsa03013	RNA transport	2.85451e-08	2.56906e-07	1.65261e-07	9
m5	hsa00970	Aminoacyl-tRNA biosynthesis	0.0030693	0.0184158	0.0118464	3
m5	hsa03018	RNA degradation	0.00509853	0.0229434	0.0147589	3
m5	hsa03020	RNA polymerase	0.00828719	0.0298339	0.0191914	2
m5	hsa03010	Ribosome	0.0301682	0.0818959	0.0526816	3
m5	hsa04623	Cytosolic DNA-sensing pathway	0.0318484	0.0818959	0.0526816	2
m5	hsa00450	Selenocompound metabolism	0.073251	0.164815	0.106021	1
m5	hsa00410	beta-Alanine metabolism	0.129637	0.259274	0.166784	1
m5	hsa00270	Cysteine and methionine metabolism	0.190001	0.312428	0.200977	1
m5	hsa00330	Arginine and proline metabolism	0.200858	0.312428	0.200977	1
m5	hsa00480	Glutathione metabolism	0.222148	0.312428	0.200977	1
m5	hsa00240	Pyrimidine metabolism	0.225642	0.312428	0.200977	1
m5	hsa00230	Purine metabolism	0.443438	0.521239	0.3353	1
m5	hsa03040	Spliceosome	0.453469	0.521239	0.3353	1
m5	hsa04915	Estrogen signaling pathway	0.463324	0.521239	0.3353	1
m5	hsa05016	Huntington disease	0.58252	0.616786	0.396763	1
m5	hsa05168	Herpes simplex virus 1 infection	0.896829	0.896829	0.576908	1
m6	hsa04144	Endocytosis	0.000549854	0.0368402	0.0368402	6
m6	hsa04660	T cell receptor signaling pathway	0.00927463	0.3107	0.3107	3
m6	hsa04640	Hematopoietic cell lineage	0.0657137	0.657261	0.657261	2
m6	hsa04070	Phosphatidylinositol signaling system	0.0681033	0.657261	0.657261	2
m6	hsa05166	Human T-cell leukemia virus 1 infection	0.0681236	0.657261	0.657261	3
m6	hsa04928	Parathyroid hormone synthesis, secretion and action	0.0766903	0.657261	0.657261	2
m6	hsa04659	Th17 cell differentiation	0.0779443	0.657261	0.657261	2
m6	hsa04910	Insulin signaling pathway	0.118304	0.657261	0.657261	2
m6	hsa05162	Measles	0.119729	0.657261	0.657261	2
m6	hsa00512	Mucin type O-glycan biosynthesis	0.12617	0.657261	0.657261	1
m6	hsa04710	Circadian rhythm	0.12617	0.657261	0.657261	1
m6	hsa05340	Primary immunodeficiency	0.148738	0.657261	0.657261	1
m6	hsa04217	Necroptosis	0.155126	0.657261	0.657261	2
m6	hsa00510	N-Glycan biosynthesis	0.195711	0.657261	0.657261	1
m6	hsa00561	Glycerolipid metabolism	0.233484	0.657261	0.657261	1
m6	hsa04810	Regulation of actin cytoskeleton	0.237018	0.657261	0.657261	2
m6	hsa05131	Shigellosis	0.246788	0.657261	0.657261	1
m6	hsa05321	Inflammatory bowel disease (IBD)	0.246788	0.657261	0.657261	1
m6	hsa05163	Human cytomegalovirus infection	0.2548	0.657261	0.657261	2
m6	hsa04664	Fc epsilon RI signaling pathway	0.256618	0.657261	0.657261	1
m6	hsa04622	RIG-I-like receptor signaling pathway	0.263103	0.657261	0.657261	1
m6	hsa04115	p53 signaling pathway	0.269532	0.657261	0.657261	1
m6	hsa00562	Inositol phosphate metabolism	0.275907	0.657261	0.657261	1
m6	hsa04146	Peroxisome	0.303933	0.657261	0.657261	1
m6	hsa04742	Taste transduction	0.303933	0.657261	0.657261	1
m6	hsa04012	ErbB signaling pathway	0.310017	0.657261	0.657261	1
m6	hsa04666	Fc gamma R-mediated phagocytosis	0.327959	0.657261	0.657261	1
m6	hsa04350	TGF-beta signaling pathway	0.330905	0.657261	0.657261	1
m6	hsa04658	Th1 and Th2 cell differentiation	0.330905	0.657261	0.657261	1
m6	hsa00564	Glycerophospholipid metabolism	0.345448	0.657261	0.657261	1
m6	hsa05231	Choline metabolism in cancer	0.351179	0.657261	0.657261	1
m6	hsa04064	NF-kappa B signaling pathway	0.354026	0.657261	0.657261	1
m6	hsa04933	AGE-RAGE signaling pathway in diabetic complications	0.354026	0.657261	0.657261	1
m6	hsa04922	Glucagon signaling pathway	0.362495	0.657261	0.657261	1
m6	hsa05142	Chagas disease (American trypanosomiasis)	0.362495	0.657261	0.657261	1
m6	hsa04625	C-type lectin receptor signaling pathway	0.365294	0.657261	0.657261	1
m6	hsa04010	MAPK signaling pathway	0.367502	0.657261	0.657261	2
m6	hsa04668	TNF signaling pathway	0.381839	0.657261	0.657261	1
m6	hsa04142	Lysosome	0.416263	0.657261	0.657261	1
m6	hsa04611	Platelet activation	0.418833	0.657261	0.657261	1
m6	hsa04380	Osteoclast differentiation	0.429002	0.657261	0.657261	1
m6	hsa04650	Natural killer cell mediated cytotoxicity	0.436515	0.657261	0.657261	1
m6	hsa04068	FoxO signaling pathway	0.438998	0.657261	0.657261	1
m6	hsa04270	Vascular smooth muscle contraction	0.438998	0.657261	0.657261	1
m6	hsa04210	Apoptosis	0.448824	0.657261	0.657261	1
m6	hsa04120	Ubiquitin mediated proteolysis	0.451254	0.657261	0.657261	1
m6	hsa04072	Phospholipase D signaling pathway	0.47731	0.660967	0.660967	1
m6	hsa04218	Cellular senescence	0.504365	0.660967	0.660967	1
m6	hsa04630	JAK-STAT signaling pathway	0.50874	0.660967	0.660967	1
m6	hsa05161	Hepatitis B	0.510914	0.660967	0.660967	1
m6	hsa03013	RNA transport	0.515233	0.660967	0.660967	1
m6	hsa04141	Protein processing in endoplasmic reticulum	0.515233	0.660967	0.660967	1
m6	hsa04621	NOD-like receptor signaling pathway	0.542417	0.660967	0.660967	1
m6	hsa05152	Tuberculosis	0.544445	0.660967	0.660967	1
m6	hsa04360	Axon guidance	0.548477	0.660967	0.660967	1
m6	hsa05202	Transcriptional misregulation in cancer	0.558404	0.660967	0.660967	1
m6	hsa04020	Calcium signaling pathway	0.562315	0.660967	0.660967	1
m6	hsa04510	Focal adhesion	0.583233	0.665573	0.665573	1
m6	hsa05169	Epstein-Barr virus infection	0.58693	0.665573	0.665573	1
m6	hsa04015	Rap1 signaling pathway	0.596036	0.665573	0.665573	1
m6	hsa05170	Human immunodeficiency virus 1 infection	0.606705	0.666381	0.666381	1
m6	hsa04714	Thermogenesis	0.638717	0.680986	0.680986	1
m6	hsa04014	Ras signaling pathway	0.64033	0.680986	0.680986	1
m6	hsa04060	Cytokine-cytokine receptor interaction	0.727776	0.75643	0.75643	1
m6	hsa05206	MicroRNAs in cancer	0.73385	0.75643	0.75643	1
m6	hsa04151	PI3K-Akt signaling pathway	0.792557	0.804565	0.804565	1
m6	hsa05168	Herpes simplex virus 1 infection	0.889896	0.889896	0.889896	1
m7	hsa04137	Mitophagy - animal	0.0644055	0.167767	0.167767	1
m7	hsa00830	Retinol metabolism	0.0663283	0.167767	0.167767	1
m7	hsa04657	IL-17 signaling pathway	0.0910112	0.167767	0.167767	1
m7	hsa04064	NF-kappa B signaling pathway	0.0975582	0.167767	0.167767	1
m7	hsa04668	TNF signaling pathway	0.10684	0.167767	0.167767	1
m7	hsa04140	Autophagy - animal	0.123336	0.167767	0.167767	1
m7	hsa03040	Spliceosome	0.128775	0.167767	0.167767	1
m7	hsa04120	Ubiquitin mediated proteolysis	0.131483	0.167767	0.167767	1
m7	hsa04514	Cell adhesion molecules (CAMs)	0.139564	0.167767	0.167767	1
m7	hsa04150	mTOR signaling pathway	0.145804	0.167767	0.167767	1
m7	hsa04390	Hippo signaling pathway	0.146692	0.167767	0.167767	1
m7	hsa04530	Tight junction	0.160794	0.167767	0.167767	1
m7	hsa04621	NOD-like receptor signaling pathway	0.167767	0.167767	0.167767	1
m8	hsa04080	Neuroactive ligand-receptor interaction	2.07605e-30	7.68137e-29	5.24475e-29	28
m8	hsa04062	Chemokine signaling pathway	3.29652e-06	6.09856e-05	4.16403e-05	8
m8	hsa04072	Phospholipase D signaling pathway	6.83255e-06	8.42681e-05	5.75373e-05	7
m8	hsa04020	Calcium signaling pathway	0.000294889	0.00249845	0.00170591	6
m8	hsa05150	Staphylococcus aureus infection	0.000337629	0.00249845	0.00170591	4
m8	hsa04610	Complement and coagulation cascades	0.000598959	0.00369358	0.00252193	4
m8	hsa04750	Inflammatory mediator regulation of TRP channels	0.00145053	0.00766709	0.005235	4
m8	hsa04724	Glutamatergic synapse	0.00234849	0.0108618	0.0074163	4
m8	hsa04060	Cytokine-cytokine receptor interaction	0.00302051	0.0124177	0.00847863	6
m8	hsa05032	Morphine addiction	0.0102008	0.0377428	0.0257704	3
m8	hsa04071	Sphingolipid signaling pathway	0.0209051	0.0703171	0.0480117	3
m8	hsa05030	Cocaine addiction	0.0244385	0.0753519	0.0514494	2
m8	hsa04022	cGMP-PKG signaling pathway	0.0487688	0.138804	0.0947734	3
m8	hsa05133	Pertussis	0.0544847	0.143995	0.0983182	2
m8	hsa04540	Gap junction	0.0705343	0.168142	0.114806	2
m8	hsa05323	Rheumatoid arthritis	0.074764	0.168142	0.114806	2
m8	hsa04657	IL-17 signaling pathway	0.0776286	0.168142	0.114806	2
m8	hsa04015	Rap1 signaling pathway	0.0817989	0.168142	0.114806	3
m8	hsa04810	Regulation of actin cytoskeleton	0.0893381	0.173974	0.118787	3
m8	hsa04726	Serotonergic synapse	0.111235	0.205785	0.140507	2
m8	hsa05020	Prion diseases	0.160346	0.282514	0.192897	1
m8	hsa04961	Endocrine and other factor-regulated calcium reabsorption	0.213276	0.349426	0.238584	1
m8	hsa04672	Intestinal immune network for IgA production	0.21721	0.349426	0.238584	1
m8	hsa04923	Regulation of lipolysis in adipocytes	0.240416	0.370641	0.253069	1
m8	hsa04151	PI3K-Akt signaling pathway	0.256788	0.380046	0.259491	3
m8	hsa04024	cAMP signaling pathway	0.284243	0.4045	0.276188	2
m8	hsa04971	Gastric acid secretion	0.313027	0.428964	0.292891	1
m8	hsa04742	Taste transduction	0.340138	0.438025	0.299078	1
m8	hsa04144	Endocytosis	0.343317	0.438025	0.299078	2
m8	hsa05142	Chagas disease (American trypanosomiasis)	0.403434	0.497568	0.339734	1
m8	hsa04668	TNF signaling pathway	0.424157	0.506252	0.345663	1
m8	hsa04611	Platelet activation	0.463522	0.528846	0.361089	1
m8	hsa04068	FoxO signaling pathway	0.484825	0.528846	0.361089	1
m8	hsa05322	Systemic lupus erythematosus	0.487429	0.528846	0.361089	1
m8	hsa04915	Estrogen signaling pathway	0.500259	0.528846	0.361089	1
m8	hsa05163	Human cytomegalovirus infection	0.67935	0.69822	0.476737	1
m8	hsa05168	Herpes simplex virus 1 infection	0.92047	0.92047	0.628486	1
m9	hsa03008	Ribosome biogenesis in eukaryotes	1.88493e-13	2.4504e-12	9.92067e-13	12
m9	hsa03010	Ribosome	6.53108e-09	4.2452e-08	1.7187e-08	10
m9	hsa00970	Aminoacyl-tRNA biosynthesis	1.34183e-06	5.8146e-06	2.35409e-06	6
m9	hsa03013	RNA transport	2.72606e-05	8.85968e-05	3.58692e-05	7
m9	hsa03018	RNA degradation	0.000871719	0.00226647	0.000917599	4
m9	hsa00450	Selenocompound metabolism	0.00378637	0.00820379	0.00332137	2
m9	hsa03020	RNA polymerase	0.0123331	0.0229044	0.00927304	2
m9	hsa04623	Cytosolic DNA-sensing pathway	0.0464066	0.0754107	0.0305307	2
m9	hsa00240	Pyrimidine metabolism	0.269725	0.389602	0.157734	1
m9	hsa00230	Purine metabolism	0.513387	0.579226	0.234504	1
m9	hsa03040	Spliceosome	0.524145	0.579226	0.234504	1
m9	hsa04915	Estrogen signaling pathway	0.53467	0.579226	0.234504	1
m9	hsa05016	Huntington disease	0.658271	0.658271	0.266506	1
m10	hsa04610	Complement and coagulation cascades	1.19416e-12	5.01549e-11	3.77105e-11	9
m10	hsa05150	Staphylococcus aureus infection	0.00124895	0.0241189	0.0181345	3
m10	hsa05133	Pertussis	0.00172278	0.0241189	0.0181345	3
m10	hsa04614	Renin-angiotensin system	0.00236648	0.0248481	0.0186828	2
m10	hsa05146	Amoebiasis	0.00335754	0.0282034	0.0212055	3
m10	hsa05143	African trypanosomiasis	0.00606194	0.0424336	0.0319049	2
m10	hsa05322	Systemic lupus erythematosus	0.00833545	0.0500127	0.0376035	3
m10	hsa04979	Cholesterol metabolism	0.0108717	0.0570764	0.0429146	2
m10	hsa00830	Retinol metabolism	0.0189859	0.0829956	0.0624027	2
m10	hsa04080	Neuroactive ligand-receptor interaction	0.020895	0.0829956	0.0624027	4
m10	hsa04976	Bile secretion	0.0217369	0.0829956	0.0624027	2
m10	hsa05204	Chemical carcinogenesis	0.0277018	0.0969564	0.0728996	2
m10	hsa04977	Vitamin digestion and absorption	0.0738296	0.238526	0.179343	1
m10	hsa00591	Linoleic acid metabolism	0.0885379	0.265614	0.19971	1
m10	hsa05020	Prion diseases	0.105892	0.286833	0.215664	1
m10	hsa04360	Axon guidance	0.112409	0.286833	0.215664	2
m10	hsa00260	Glycine, serine and threonine metabolism	0.120111	0.286833	0.215664	1
m10	hsa04975	Fat digestion and absorption	0.122929	0.286833	0.215664	1
m10	hsa00270	Cysteine and methionine metabolism	0.139653	0.308707	0.232111	1
m10	hsa04978	Mineral absorption	0.150633	0.316328	0.237841	1
m10	hsa00140	Steroid hormone biosynthesis	0.174846	0.324399	0.243909	1
m10	hsa00590	Arachidonic acid metabolism	0.182769	0.324399	0.243909	1
m10	hsa04927	Cortisol synthesis and secretion	0.188011	0.324399	0.243909	1
m10	hsa04924	Renin secretion	0.198397	0.324399	0.243909	1
m10	hsa00982	Drug metabolism - cytochrome P450	0.206102	0.324399	0.243909	1
m10	hsa03320	PPAR signaling pathway	0.2112	0.324399	0.243909	1
m10	hsa01230	Biosynthesis of amino acids	0.213737	0.324399	0.243909	1
m10	hsa00980	Metabolism of xenobiotics by cytochrome P450	0.216266	0.324399	0.243909	1
m10	hsa05410	Hypertrophic cardiomyopathy (HCM)	0.23868	0.345674	0.259905	1
m10	hsa05414	Dilated cardiomyopathy (DCM)	0.253279	0.349586	0.262847	1
m10	hsa04925	Aldosterone synthesis and secretion	0.269972	0.349586	0.262847	1
m10	hsa05231	Choline metabolism in cancer	0.272327	0.349586	0.262847	1
m10	hsa04933	AGE-RAGE signaling pathway in diabetic complications	0.274675	0.349586	0.262847	1
m10	hsa04931	Insulin resistance	0.293198	0.362186	0.27232	1
m10	hsa04726	Serotonergic synapse	0.309033	0.363145	0.273041	1
m10	hsa01200	Carbon metabolism	0.311267	0.363145	0.273041	1
m10	hsa04142	Lysosome	0.326713	0.370863	0.278844	1
m10	hsa04270	Vascular smooth muscle contraction	0.346084	0.382513	0.287604	1
m10	hsa04261	Adrenergic signaling in cardiomyocytes	0.373122	0.398167	0.299374	1
m10	hsa04072	Phospholipase D signaling pathway	0.379207	0.398167	0.299374	1
m10	hsa04934	Cushing syndrome	0.393186	0.402776	0.302839	1
m10	hsa05168	Herpes simplex virus 1 infection	0.802366	0.802366	0.603282	1
m11	hsa05012	Parkinson disease	2.0527e-26	5.74757e-25	3.24111e-25	20
m11	hsa00190	Oxidative phosphorylation	4.0597e-25	5.68358e-24	3.20503e-24	19
m11	hsa04932	Non-alcoholic fatty liver disease (NAFLD)	3.95456e-24	3.69092e-23	2.08135e-23	19
m11	hsa04714	Thermogenesis	1.0672e-23	7.06225e-23	3.98247e-23	21
m11	hsa05016	Huntington disease	1.26112e-23	7.06225e-23	3.98247e-23	20
m11	hsa05010	Alzheimer disease	6.06726e-23	2.83139e-22	1.59665e-22	19
m11	hsa04723	Retrograde endocannabinoid signaling	7.01597e-10	2.80639e-09	1.58255e-09	10
m11	hsa04260	Cardiac muscle contraction	4.8303e-08	1.6906e-07	9.53348e-08	7
m11	hsa03010	Ribosome	4.84974e-06	1.50881e-05	8.50832e-06	7
m11	hsa00020	Citrate cycle (TCA cycle)	0.000330695	0.000925945	0.000522149	3
m11	hsa01200	Carbon metabolism	0.015767	0.0401342	0.0226321	3
m11	hsa05230	Central carbon metabolism in cancer	0.0355294	0.0829019	0.0467492	2
m11	hsa00130	Ubiquinone and other terpenoid-quinone biosynthesis	0.0493541	0.106301	0.0599442	1
m11	hsa03060	Protein export	0.100494	0.200988	0.113339	1
m11	hsa00620	Pyruvate metabolism	0.164538	0.307137	0.173198	1
m11	hsa03022	Basal transcription factors	0.187392	0.327937	0.184927	1
m11	hsa00010	Glycolysis / Gluconeogenesis	0.269503	0.443887	0.250312	1
m11	hsa03018	RNA degradation	0.305864	0.475788	0.268302	1
m11	hsa04066	HIF-1 signaling pathway	0.370457	0.530872	0.299364	1
m11	hsa04922	Glucagon signaling pathway	0.379194	0.530872	0.299364	1
m11	hsa04218	Cellular senescence	0.524459	0.604617	0.34095	1
m11	hsa04217	Necroptosis	0.528903	0.604617	0.34095	1
m11	hsa03013	RNA transport	0.535493	0.604617	0.34095	1
m11	hsa04022	cGMP-PKG signaling pathway	0.53767	0.604617	0.34095	1
m11	hsa05164	Influenza A	0.539837	0.604617	0.34095	1
m11	hsa04020	Calcium signaling pathway	0.583126	0.627982	0.354125	1
m11	hsa05203	Viral carcinogenesis	0.607912	0.630427	0.355504	1
m11	hsa05166	Human T-cell leukemia virus 1 infection	0.639879	0.639879	0.360834	1
m12	hsa04621	NOD-like receptor signaling pathway	0.00298671	0.161283	0.157195	4
m12	hsa04144	Endocytosis	0.00911512	0.246108	0.239872	4
m12	hsa04640	Hematopoietic cell lineage	0.0434495	0.524585	0.511292	2
m12	hsa04660	T cell receptor signaling pathway	0.046734	0.524585	0.511292	2
m12	hsa04928	Parathyroid hormone synthesis, secretion and action	0.0509651	0.524585	0.511292	2
m12	hsa00512	Mucin type O-glycan biosynthesis	0.101523	0.524585	0.511292	1
m12	hsa05340	Primary immunodeficiency	0.119991	0.524585	0.511292	1
m12	hsa00510	N-Glycan biosynthesis	0.15876	0.524585	0.511292	1
m12	hsa05166	Human T-cell leukemia virus 1 infection	0.173165	0.524585	0.511292	2
m12	hsa05134	Legionellosis	0.173229	0.524585	0.511292	1
m12	hsa05163	Human cytomegalovirus infection	0.180586	0.524585	0.511292	2
m12	hsa00561	Glycerolipid metabolism	0.190275	0.524585	0.511292	1
m12	hsa05321	Inflammatory bowel disease (IBD)	0.20145	0.524585	0.511292	1
m12	hsa04664	Fc epsilon RI signaling pathway	0.209735	0.524585	0.511292	1
m12	hsa04622	RIG-I-like receptor signaling pathway	0.215211	0.524585	0.511292	1
m12	hsa04115	p53 signaling pathway	0.220651	0.524585	0.511292	1
m12	hsa04146	Peroxisome	0.249929	0.524585	0.511292	1
m12	hsa04742	Taste transduction	0.249929	0.524585	0.511292	1
m12	hsa05132	Salmonella infection	0.257728	0.524585	0.511292	1
m12	hsa04060	Cytokine-cytokine receptor interaction	0.268528	0.524585	0.511292	2
m12	hsa04010	MAPK signaling pathway	0.269821	0.524585	0.511292	2
m12	hsa04666	Fc gamma R-mediated phagocytosis	0.270553	0.524585	0.511292	1
m12	hsa04350	TGF-beta signaling pathway	0.273093	0.524585	0.511292	1
m12	hsa04658	Th1 and Th2 cell differentiation	0.273093	0.524585	0.511292	1
m12	hsa00564	Glycerophospholipid metabolism	0.285662	0.524585	0.511292	1
m12	hsa04070	Phosphatidylinositol signaling system	0.290631	0.524585	0.511292	1
m12	hsa05231	Choline metabolism in cancer	0.290631	0.524585	0.511292	1
m12	hsa04064	NF-kappa B signaling pathway	0.293103	0.524585	0.511292	1
m12	hsa05142	Chagas disease (American trypanosomiasis)	0.300469	0.524585	0.511292	1
m12	hsa04659	Th17 cell differentiation	0.310176	0.524585	0.511292	1
m12	hsa04668	TNF signaling pathway	0.317371	0.524585	0.511292	1
m12	hsa04142	Lysosome	0.347722	0.524585	0.511292	1
m12	hsa04611	Platelet activation	0.350002	0.524585	0.511292	1
m12	hsa04380	Osteoclast differentiation	0.359046	0.524585	0.511292	1
m12	hsa04650	Natural killer cell mediated cytotoxicity	0.36575	0.524585	0.511292	1
m12	hsa04068	FoxO signaling pathway	0.367969	0.524585	0.511292	1
m12	hsa04270	Vascular smooth muscle contraction	0.367969	0.524585	0.511292	1
m12	hsa04210	Apoptosis	0.376772	0.524585	0.511292	1
m12	hsa05162	Measles	0.381129	0.524585	0.511292	1
m12	hsa04072	Phospholipase D signaling pathway	0.402478	0.524585	0.511292	1
m12	hsa04217	Necroptosis	0.431179	0.524585	0.511292	1
m12	hsa04630	JAK-STAT signaling pathway	0.431179	0.524585	0.511292	1
m12	hsa05161	Hepatitis B	0.433178	0.524585	0.511292	1
m12	hsa03013	RNA transport	0.437154	0.524585	0.511292	1
m12	hsa04141	Protein processing in endoplasmic reticulum	0.437154	0.524585	0.511292	1
m12	hsa05152	Tuberculosis	0.464248	0.536985	0.523377	1
m12	hsa04360	Axon guidance	0.468015	0.536985	0.523377	1
m12	hsa05202	Transcriptional misregulation in cancer	0.47732	0.536985	0.523377	1
m12	hsa05169	Epstein-Barr virus infection	0.504304	0.546855	0.532997	1
m12	hsa04015	Rap1 signaling pathway	0.512997	0.546855	0.532997	1
m12	hsa05170	Human immunodeficiency virus 1 infection	0.523234	0.546855	0.532997	1
m12	hsa04810	Regulation of actin cytoskeleton	0.526601	0.546855	0.532997	1
m12	hsa05206	MicroRNAs in cancer	0.650304	0.662573	0.645783	1
m12	hsa04151	PI3K-Akt signaling pathway	0.713063	0.713063	0.694993	1
m13	hsa05012	Parkinson disease	1.63202e-23	3.42724e-22	1.88971e-22	17
m13	hsa00190	Oxidative phosphorylation	4.72439e-22	4.96061e-21	2.73517e-21	16
m13	hsa04932	Non-alcoholic fatty liver disease (NAFLD)	3.15483e-21	1.93393e-20	1.06633e-20	16
m13	hsa05016	Huntington disease	3.68367e-21	1.93393e-20	1.06633e-20	17
m13	hsa05010	Alzheimer disease	3.09074e-20	1.29811e-19	7.1575e-20	16
m13	hsa04714	Thermogenesis	8.39328e-20	2.93765e-19	1.61976e-19	17
m13	hsa04723	Retrograde endocannabinoid signaling	1.20469e-09	3.61407e-09	1.99272e-09	9
m13	hsa04260	Cardiac muscle contraction	7.30137e-09	1.91661e-08	1.05678e-08	7
m13	hsa03010	Ribosome	0.0019758	0.0046102	0.00254197	4
m13	hsa00130	Ubiquinone and other terpenoid-quinone biosynthesis	0.038582	0.0810222	0.0446739	1
m13	hsa03060	Protein export	0.0790339	0.150883	0.0831936	1
m13	hsa03013	RNA transport	0.116505	0.203884	0.112417	2
m13	hsa03022	Basal transcription factors	0.148973	0.240649	0.132689	1
m13	hsa03018	RNA degradation	0.247091	0.370636	0.204361	1
m13	hsa04218	Cellular senescence	0.438882	0.528546	0.291429	1
m13	hsa04217	Necroptosis	0.442963	0.528546	0.291429	1
m13	hsa04022	cGMP-PKG signaling pathway	0.451038	0.528546	0.291429	1
m13	hsa05164	Influenza A	0.45304	0.528546	0.291429	1
m13	hsa04020	Calcium signaling pathway	0.493475	0.542897	0.299342	1
m13	hsa05203	Viral carcinogenesis	0.517045	0.542897	0.299342	1
m13	hsa05166	Human T-cell leukemia virus 1 infection	0.547941	0.547941	0.302123	1
m14	hsa04060	Cytokine-cytokine receptor interaction	6.23791e-29	1.17897e-26	7.15718e-27	45
m14	hsa04668	TNF signaling pathway	3.19223e-19	3.01666e-17	1.83133e-17	24
m14	hsa04640	Hematopoietic cell lineage	7.56097e-17	4.76341e-15	2.89174e-15	21
m14	hsa05144	Malaria	9.03554e-15	4.26929e-13	2.59177e-13	15
m14	hsa04064	NF-kappa B signaling pathway	3.18326e-14	1.20327e-12	7.30474e-13	19
m14	hsa04630	JAK-STAT signaling pathway	3.83183e-14	1.20702e-12	7.32753e-13	23
m14	hsa04657	IL-17 signaling pathway	1.50989e-12	4.0767e-11	2.47485e-11	17
m14	hsa05162	Measles	1e-09	2.3625e-08	1.43421e-08	17
m14	hsa05323	Rheumatoid arthritis	1.69933e-09	3.5686e-08	2.1664e-08	14
m14	hsa05321	Inflammatory bowel disease (IBD)	3.00554e-09	5.68046e-08	3.44846e-08	12
m14	hsa04621	NOD-like receptor signaling pathway	7.84552e-09	1.348e-07	8.18336e-08	18
m14	hsa04620	Toll-like receptor signaling pathway	1.019e-08	1.60492e-07	9.74306e-08	14
m14	hsa04659	Th17 cell differentiation	1.48274e-08	2.15568e-07	1.30865e-07	14
m14	hsa05222	Small cell lung cancer	2.20959e-08	2.98295e-07	1.81087e-07	13
m14	hsa05145	Toxoplasmosis	3.02563e-08	3.8123e-07	2.31434e-07	14
m14	hsa05169	Epstein-Barr virus infection	5.30798e-08	6.27005e-07	3.80638e-07	18
m14	hsa04151	PI3K-Akt signaling pathway	6.40331e-08	7.11898e-07	4.32174e-07	24
m14	hsa04217	Necroptosis	7.86219e-08	8.2553e-07	5.01157e-07	16
m14	hsa05202	Transcriptional misregulation in cancer	9.48869e-08	9.43875e-07	5.73001e-07	17
m14	hsa05164	Influenza A	1.20497e-07	1.1387e-06	6.91273e-07	16
m14	hsa04672	Intestinal immune network for IgA production	3.21248e-07	2.89123e-06	1.75519e-06	9
m14	hsa05167	Kaposi sarcoma-associated herpesvirus infection	2.78259e-06	2.38048e-05	1.44512e-05	15
m14	hsa05161	Hepatitis B	2.89688e-06	2.38048e-05	1.44512e-05	14
m14	hsa04933	AGE-RAGE signaling pathway in diabetic complications	3.23032e-06	2.54388e-05	1.54432e-05	11
m14	hsa05166	Human T-cell leukemia virus 1 infection	4.64985e-06	3.51529e-05	2.13404e-05	16
m14	hsa05340	Primary immunodeficiency	5.63415e-06	4.09559e-05	2.48632e-05	7
m14	hsa04380	Osteoclast differentiation	6.20534e-06	4.34374e-05	2.63697e-05	12
m14	hsa04210	Apoptosis	1.1612e-05	7.8381e-05	4.7583e-05	12
m14	hsa05146	Amoebiasis	1.49773e-05	9.76105e-05	5.92567e-05	10
m14	hsa04066	HIF-1 signaling pathway	2.15121e-05	0.000135526	8.22744e-05	10
m14	hsa05160	Hepatitis C	4.32988e-05	0.000263983	0.000160257	12
m14	hsa04658	Th1 and Th2 cell differentiation	6.68624e-05	0.000387964	0.000235522	9
m14	hsa05143	African trypanosomiasis	6.77397e-05	0.000387964	0.000235522	6
m14	hsa04062	Chemokine signaling pathway	7.51265e-05	0.000417615	0.000253523	13
m14	hsa05212	Pancreatic cancer	9.27113e-05	0.000500641	0.000303926	8
m14	hsa05220	Chronic myeloid leukemia	0.00010194	0.000535184	0.000324896	8
m14	hsa04610	Complement and coagulation cascades	0.0001343	0.000686017	0.000416463	8
m14	hsa05142	Chagas disease (American trypanosomiasis)	0.000161196	0.000801738	0.000486714	9
m14	hsa04512	ECM-receptor interaction	0.000174707	0.000846658	0.000513983	8
m14	hsa04623	Cytosolic DNA-sensing pathway	0.000198707	0.000938893	0.000569977	7
m14	hsa05150	Staphylococcus aureus infection	0.000321168	0.00148051	0.000898775	7
m14	hsa05418	Fluid shear stress and atherosclerosis	0.000347518	0.00156383	0.000949361	10
m14	hsa05163	Human cytomegalovirus infection	0.000403914	0.00177534	0.00107776	13
m14	hsa04115	p53 signaling pathway	0.000457528	0.00196529	0.00119307	7
m14	hsa05203	Viral carcinogenesis	0.000504879	0.00211338	0.00128298	12
m14	hsa04514	Cell adhesion molecules (CAMs)	0.000514368	0.00211338	0.00128298	10
m14	hsa05165	Human papillomavirus infection	0.000625619	0.00250661	0.0015217	16
m14	hsa05133	Pertussis	0.0006366	0.00250661	0.0015217	7
m14	hsa05152	Tuberculosis	0.000681169	0.00262737	0.001595	11
m14	hsa04625	C-type lectin receptor signaling pathway	0.000882289	0.00333273	0.00202321	8
m14	hsa04614	Renin-angiotensin system	0.000899308	0.00333273	0.00202321	4
m14	hsa05223	Non-small cell lung cancer	0.00166933	0.00606737	0.00368333	6
m14	hsa04920	Adipocytokine signaling pathway	0.00210035	0.00748993	0.00454694	6
m14	hsa04622	RIG-I-like receptor signaling pathway	0.00226121	0.00791423	0.00480452	6
m14	hsa05134	Legionellosis	0.00407454	0.0140016	0.00849999	5
m14	hsa01521	EGFR tyrosine kinase inhibitor resistance	0.00415861	0.0140353	0.00852046	6
m14	hsa04010	MAPK signaling pathway	0.0046494	0.0154164	0.0093589	13
m14	hsa04014	Ras signaling pathway	0.00529374	0.0172503	0.0104722	11
m14	hsa05216	Thyroid cancer	0.00543766	0.0173656	0.0105422	4
m14	hsa05416	Viral myocarditis	0.00551289	0.0173656	0.0105422	5
m14	hsa05330	Allograft rejection	0.00598737	0.018551	0.0112618	4
m14	hsa05168	Herpes simplex virus 1 infection	0.00664037	0.0202424	0.0122886	18
m14	hsa05219	Bladder cancer	0.00785517	0.0235655	0.014306	4
m14	hsa05131	Shigellosis	0.0082932	0.0244909	0.0148677	5
m14	hsa05221	Acute myeloid leukemia	0.00883614	0.0256928	0.0155974	5
m14	hsa04917	Prolactin signaling pathway	0.0112539	0.0322272	0.0195643	5
m14	hsa05218	Melanoma	0.0126172	0.0355919	0.0216069	5
m14	hsa04068	FoxO signaling pathway	0.0140049	0.0389253	0.0236305	7
m14	hsa04510	Focal adhesion	0.0150368	0.0411877	0.0250039	9
m14	hsa05205	Proteoglycans in cancer	0.0159579	0.0430862	0.0261565	9
m14	hsa05014	Amyotrophic lateral sclerosis (ALS)	0.0167105	0.044483	0.0270044	4
m14	hsa05320	Autoimmune thyroid disease	0.0190105	0.0499026	0.0302945	4
m14	hsa01523	Antifolate resistance	0.021544	0.0557784	0.0338616	3
m14	hsa05410	Hypertrophic cardiomyopathy (HCM)	0.0242538	0.0619455	0.0376054	5
m14	hsa04215	Apoptosis - multiple species	0.0254293	0.0640818	0.0389024	3
m14	hsa00590	Arachidonic acid metabolism	0.0333778	0.0830054	0.0503904	4
m14	hsa05215	Prostate cancer	0.0397199	0.0974943	0.0591862	5
m14	hsa05120	Epithelial cell signaling in Helicobacter pylori infection	0.0424121	0.102768	0.0623876	4
m14	hsa04015	Rap1 signaling pathway	0.0465028	0.111253	0.067539	8
m14	hsa04662	B cell receptor signaling pathway	0.048433	0.114423	0.0694631	4
m14	hsa01524	Platinum drug resistance	0.0526964	0.122958	0.0746447	4
m14	hsa05170	Human immunodeficiency virus 1 infection	0.0534023	0.123086	0.0747221	8
m14	hsa05140	Leishmaniasis	0.0549026	0.125019	0.0758957	4
m14	hsa04931	Insulin resistance	0.0582014	0.130953	0.0794982	5
m14	hsa04913	Ovarian steroidogenesis	0.0688067	0.152994	0.0928785	3
m14	hsa05132	Salmonella infection	0.0851595	0.187153	0.113616	4
m14	hsa05213	Endometrial cancer	0.101902	0.221373	0.13439	3
m14	hsa05225	Hepatocellular carcinoma	0.10743	0.23073	0.14007	6
m14	hsa04650	Natural killer cell mediated cytotoxicity	0.110225	0.234074	0.1421	5
m14	hsa05310	Asthma	0.120476	0.253	0.153589	2
m14	hsa05217	Basal cell carcinoma	0.122551	0.254528	0.154517	3
m14	hsa05206	MicroRNAs in cancer	0.125783	0.258401	0.156869	9
m14	hsa03410	Base excision repair	0.133494	0.271295	0.164696	2
m14	hsa05020	Prion diseases	0.146813	0.293612	0.178244	2
m14	hsa04924	Renin secretion	0.149136	0.293612	0.178244	3
m14	hsa05211	Renal cell carcinoma	0.149136	0.293612	0.178244	3
m14	hsa05226	Gastric cancer	0.162454	0.316533	0.192159	5
m14	hsa03320	PPAR signaling pathway	0.172573	0.332819	0.202045	3
m14	hsa05214	Glioma	0.177382	0.338638	0.205578	3
m14	hsa04975	Fat digestion and absorption	0.188166	0.352112	0.213758	2
m14	hsa05332	Graft-versus-host disease	0.188166	0.352112	0.213758	2
m14	hsa04940	Type I diabetes mellitus	0.202294	0.374838	0.227554	2
m14	hsa04142	Lysosome	0.215309	0.395081	0.239843	4
m14	hsa04930	Type II diabetes mellitus	0.223696	0.406525	0.24679	2
m14	hsa04012	ErbB signaling pathway	0.227266	0.409079	0.248341	3
m14	hsa05210	Colorectal cancer	0.232402	0.414378	0.251558	3
m14	hsa04979	Cholesterol metabolism	0.252476	0.443009	0.268939	2
m14	hsa04974	Protein digestion and absorption	0.253148	0.443009	0.268939	3
m14	hsa05322	Systemic lupus erythematosus	0.257098	0.445794	0.27063	4
m14	hsa00910	Nitrogen metabolism	0.283138	0.486482	0.29533	1
m14	hsa04972	Pancreatic secretion	0.295332	0.499098	0.302989	3
m14	hsa00480	Glutathione metabolism	0.295762	0.499098	0.302989	2
m14	hsa04750	Inflammatory mediator regulation of TRP channels	0.305965	0.511596	0.310576	3
m14	hsa04660	T cell receptor signaling pathway	0.311288	0.511596	0.310576	3
m14	hsa04916	Melanogenesis	0.311288	0.511596	0.310576	3
m14	hsa04370	VEGF signaling pathway	0.317301	0.516981	0.313846	2
m14	hsa04932	Non-alcoholic fatty liver disease (NAFLD)	0.326737	0.527806	0.320417	4
m14	hsa00220	Arginine biosynthesis	0.337212	0.539984	0.32781	1
m14	hsa04145	Phagosome	0.33999	0.539984	0.32781	4
m14	hsa04137	Mitophagy - animal	0.359873	0.561903	0.341116	2
m14	hsa04927	Cortisol synthesis and secretion	0.359873	0.561903	0.341116	2
m14	hsa04964	Proximal tubule bicarbonate reclamation	0.36271	0.561903	0.341116	1
m14	hsa04670	Leukocyte transendothelial migration	0.369825	0.568267	0.34498	3
m14	hsa04218	Cellular senescence	0.375388	0.572165	0.347346	4
m14	hsa04726	Serotonergic synapse	0.385681	0.580849	0.352618	3
m14	hsa00592	alpha-Linolenic acid metabolism	0.387233	0.580849	0.352618	1
m14	hsa04810	Regulation of actin cytoskeleton	0.400127	0.592707	0.359816	5
m14	hsa04722	Neurotrophin signaling pathway	0.406679	0.592707	0.359816	3
m14	hsa04976	Bile secretion	0.408263	0.592707	0.359816	2
m14	hsa05412	Arrhythmogenic right ventricular cardiomyopathy (ARVC)	0.408263	0.592707	0.359816	2
m14	hsa04966	Collecting duct acid secretion	0.410818	0.592707	0.359816	1
m14	hsa00591	Linoleic acid metabolism	0.433501	0.620694	0.376807	1
m14	hsa00760	Nicotinate and nicotinamide metabolism	0.444515	0.631679	0.383475	1
m14	hsa04140	Autophagy - animal	0.453087	0.639055	0.387953	3
m14	hsa04926	Relaxin signaling pathway	0.463206	0.648488	0.39368	3
m14	hsa05204	Chemical carcinogenesis	0.474153	0.658934	0.400021	2
m14	hsa00350	Tyrosine metabolism	0.506272	0.695314	0.422107	1
m14	hsa04550	Signaling pathways regulating pluripotency of stem cells	0.50769	0.695314	0.422107	3
m14	hsa04211	Longevity regulating pathway	0.517589	0.703772	0.427241	2
m14	hsa04970	Salivary secretion	0.523599	0.706858	0.429115	2
m14	hsa05414	Dilated cardiomyopathy (DCM)	0.529559	0.709834	0.430921	2
m14	hsa04216	Ferroptosis	0.543603	0.721097	0.437759	1
m14	hsa05224	Breast cancer	0.545592	0.721097	0.437759	3
m14	hsa00860	Porphyrin and chlorophyll metabolism	0.561202	0.736578	0.447157	1
m14	hsa01522	Endocrine resistance	0.569855	0.741621	0.450218	2
m14	hsa04921	Oxytocin signaling pathway	0.572892	0.741621	0.450218	3
m14	hsa04934	Cushing syndrome	0.581766	0.747985	0.454082	3
m14	hsa00565	Ether lipid metabolism	0.602308	0.769163	0.466938	1
m14	hsa04330	Notch signaling pathway	0.610058	0.772133	0.468741	1
m14	hsa04928	Parathyroid hormone synthesis, secretion and action	0.612804	0.772133	0.468741	2
m14	hsa05030	Cocaine addiction	0.617657	0.773094	0.469325	1
m14	hsa00330	Arginine and proline metabolism	0.62511	0.777275	0.471863	1
m14	hsa04978	Mineral absorption	0.632419	0.781223	0.47426	1
m14	hsa05010	Alzheimer disease	0.648485	0.795868	0.48315	3
m14	hsa04923	Regulation of lipolysis in adipocytes	0.660263	0.805095	0.488752	1
m14	hsa04152	AMPK signaling pathway	0.679993	0.823838	0.50013	2
m14	hsa04110	Cell cycle	0.69737	0.834196	0.506418	2
m14	hsa04611	Platelet activation	0.69737	0.834196	0.506418	2
m14	hsa05016	Huntington disease	0.727427	0.861971	0.523279	3
m14	hsa04270	Vascular smooth muscle contraction	0.729795	0.861971	0.523279	2
m14	hsa04664	Fc epsilon RI signaling pathway	0.737074	0.861971	0.523279	1
m14	hsa04120	Ubiquitin mediated proteolysis	0.74854	0.861971	0.523279	2
m14	hsa04371	Apelin signaling pathway	0.74854	0.861971	0.523279	2
m14	hsa04910	Insulin signaling pathway	0.74854	0.861971	0.523279	2
m14	hsa00982	Drug metabolism - cytochrome P450	0.757034	0.861971	0.523279	1
m14	hsa04918	Thyroid hormone synthesis	0.766441	0.861971	0.523279	1
m14	hsa05100	Bacterial invasion of epithelial cells	0.766441	0.861971	0.523279	1
m14	hsa01230	Biosynthesis of amino acids	0.771008	0.861971	0.523279	1
m14	hsa04971	Gastric acid secretion	0.771008	0.861971	0.523279	1
m14	hsa00980	Metabolism of xenobiotics by cytochrome P450	0.775487	0.861971	0.523279	1
m14	hsa04612	Antigen processing and presentation	0.779878	0.861971	0.523279	1
m14	hsa04080	Neuroactive ligand-receptor interaction	0.790406	0.868527	0.52726	5
m14	hsa04350	TGF-beta signaling pathway	0.836377	0.911962	0.553628	1
m14	hsa04912	GnRH signaling pathway	0.839584	0.911962	0.553628	1
m14	hsa04530	Tight junction	0.846309	0.912652	0.554047	2
m14	hsa00564	Glycerophospholipid metabolism	0.8518	0.912652	0.554047	1
m14	hsa04925	Aldosterone synthesis and secretion	0.854706	0.912652	0.554047	1
m14	hsa04071	Sphingolipid signaling pathway	0.904206	0.960084	0.582841	1
m14	hsa00230	Purine metabolism	0.92302	0.974586	0.591645	1
m14	hsa04072	Phospholipase D signaling pathway	0.946211	0.979064	0.594364	1
m14	hsa04723	Retrograde endocannabinoid signaling	0.946211	0.979064	0.594364	1
m14	hsa04150	mTOR signaling pathway	0.951317	0.979064	0.594364	1
m14	hsa04390	Hippo signaling pathway	0.952279	0.979064	0.594364	1
m14	hsa04144	Endocytosis	0.953163	0.979064	0.594364	2
m14	hsa04141	Protein processing in endoplasmic reticulum	0.96169	0.982483	0.596439	1
m14	hsa04360	Axon guidance	0.972183	0.98626	0.598732	1
m14	hsa04020	Calcium signaling pathway	0.975823	0.98626	0.598732	1
m14	hsa04024	cAMP signaling pathway	0.985067	0.989814	0.600889	1
m14	hsa04714	Thermogenesis	0.989814	0.989814	0.600889	1
m15	hsa04110	Cell cycle	1.16515e-05	0.00023303	0.000147177	5
m15	hsa03030	DNA replication	9.58292e-05	0.000946093	0.000597533	3
m15	hsa03440	Homologous recombination	0.000141914	0.000946093	0.000597533	3
m15	hsa03430	Mismatch repair	0.00151218	0.00756092	0.00477532	2
m15	hsa04114	Oocyte meiosis	0.00369024	0.0147609	0.0093227	3
m15	hsa03420	Nucleotide excision repair	0.00622881	0.0203952	0.0128812	2
m15	hsa03013	RNA transport	0.00800057	0.0203952	0.0128812	3
m15	hsa03460	Fanconi anemia pathway	0.00815806	0.0203952	0.0128812	2
m15	hsa03410	Base excision repair	0.0809257	0.179835	0.11358	1
m15	hsa05166	Human T-cell leukemia virus 1 infection	0.10609	0.212181	0.134009	2
m15	hsa00480	Glutathione metabolism	0.133606	0.226384	0.142979	1
m15	hsa00240	Pyrimidine metabolism	0.13583	0.226384	0.142979	1
m15	hsa00970	Aminoacyl-tRNA biosynthesis	0.155605	0.239392	0.151195	1
m15	hsa04115	p53 signaling pathway	0.168548	0.240782	0.152073	1
m15	hsa00983	Drug metabolism - other enzymes	0.18341	0.244546	0.15445	1
m15	hsa05222	Small cell lung cancer	0.21238	0.264112	0.166807	1
m15	hsa04914	Progesterone-mediated oocyte maturation	0.224495	0.264112	0.166807	1
m15	hsa00230	Purine metabolism	0.284319	0.310926	0.196374	1
m15	hsa04210	Apoptosis	0.29538	0.310926	0.196374	1
m15	hsa03010	Ribosome	0.325843	0.325843	0.205796	1
m16	hsa01200	Carbon metabolism	2.61283e-24	2.27316e-22	1.23766e-22	25
m16	hsa00010	Glycolysis / Gluconeogenesis	6.19707e-21	1.98201e-19	1.07914e-19	19
m16	hsa00620	Pyruvate metabolism	6.83453e-21	1.98201e-19	1.07914e-19	16
m16	hsa00280	Valine, leucine and isoleucine degradation	3.71687e-19	8.0842e-18	4.40156e-18	16
m16	hsa00640	Propanoate metabolism	7.03535e-19	1.22415e-17	6.66507e-18	14
m16	hsa00071	Fatty acid degradation	1.50917e-16	2.1883e-15	1.19145e-15	14
m16	hsa00020	Citrate cycle (TCA cycle)	2.35238e-12	2.92367e-11	1.59183e-11	10
m16	hsa01212	Fatty acid metabolism	1.1894e-09	1.29347e-08	7.04248e-09	10
m16	hsa00630	Glyoxylate and dicarboxylate metabolism	3.08674e-09	2.98385e-08	1.6246e-08	8
m16	hsa04146	Peroxisome	8.53963e-09	7.42948e-08	4.04509e-08	11
m16	hsa00260	Glycine, serine and threonine metabolism	3.63977e-08	2.87873e-07	1.56737e-07	8
m16	hsa01230	Biosynthesis of amino acids	3.98179e-08	2.8868e-07	1.57176e-07	10
m16	hsa00061	Fatty acid biosynthesis	7.21737e-08	4.83009e-07	2.62981e-07	6
m16	hsa00270	Cysteine and methionine metabolism	1.37971e-07	8.57391e-07	4.66819e-07	8
m16	hsa00410	beta-Alanine metabolism	2.49283e-06	1.44584e-05	7.87209e-06	6
m16	hsa03320	PPAR signaling pathway	4.93828e-06	2.68519e-05	1.46199e-05	8
m16	hsa00072	Synthesis and degradation of ketone bodies	5.53439e-06	2.8323e-05	1.54209e-05	4
m16	hsa00340	Histidine metabolism	9.85603e-06	4.76375e-05	2.59369e-05	5
m16	hsa00380	Tryptophan metabolism	1.58022e-05	7.20364e-05	3.92213e-05	6
m16	hsa00590	Arachidonic acid metabolism	1.65601e-05	7.20364e-05	3.92213e-05	7
m16	hsa00650	Butanoate metabolism	2.73246e-05	0.000113202	6.16344e-05	5
m16	hsa00330	Arginine and proline metabolism	4.39737e-05	0.000173896	9.46803e-05	6
m16	hsa00980	Metabolism of xenobiotics by cytochrome P450	5.69202e-05	0.000215307	0.000117227	7
m16	hsa00350	Tyrosine metabolism	9.64372e-05	0.000349585	0.000190337	5
m16	hsa00310	Lysine degradation	0.000113345	0.000386156	0.000210248	6
m16	hsa00670	One carbon pool by folate	0.000115403	0.000386156	0.000210248	4
m16	hsa05230	Central carbon metabolism in cancer	0.000194997	0.000628325	0.000342101	6
m16	hsa00830	Retinol metabolism	0.000230663	0.000716704	0.00039022	6
m16	hsa04922	Glucagon signaling pathway	0.000386385	0.00115915	0.000631119	7
m16	hsa00480	Glutathione metabolism	0.000793953	0.00230246	0.00125361	5
m16	hsa00360	Phenylalanine metabolism	0.00130652	0.0036667	0.00199639	3
m16	hsa01210	2-Oxocarboxylic acid metabolism	0.00155295	0.0042221	0.00229878	3
m16	hsa05204	Chemical carcinogenesis	0.00433626	0.011432	0.0062243	5
m16	hsa00053	Ascorbate and aldarate metabolism	0.00511025	0.0130762	0.00711954	3
m16	hsa00561	Glycerolipid metabolism	0.00824108	0.020485	0.0111533	4
m16	hsa00130	Ubiquinone and other terpenoid-quinone biosynthesis	0.0086874	0.0209946	0.0114308	2
m16	hsa00051	Fructose and mannose metabolism	0.00900599	0.0211762	0.0115297	3
m16	hsa00040	Pentose and glucuronate interconversions	0.0097847	0.0224018	0.012197	3
m16	hsa00982	Drug metabolism - cytochrome P450	0.0145662	0.0324939	0.0176918	4
m16	hsa00220	Arginine biosynthesis	0.0304662	0.0662641	0.0360784	2
m16	hsa00900	Terpenoid backbone biosynthesis	0.0332307	0.070514	0.0383924	2
m16	hsa04066	HIF-1 signaling pathway	0.0421441	0.0872984	0.0475309	4
m16	hsa04920	Adipocytokine signaling pathway	0.0617891	0.125015	0.0680663	3
m16	hsa04714	Thermogenesis	0.0828113	0.163741	0.089151	6
m16	hsa04216	Ferroptosis	0.0965169	0.186599	0.101597	2
m16	hsa00565	Ether lipid metabolism	0.126253	0.238783	0.130009	2
m16	hsa00520	Amino sugar and nucleotide sugar metabolism	0.130665	0.241868	0.131689	2
m16	hsa00430	Taurine and hypotaurine metabolism	0.135355	0.24533	0.133574	1
m16	hsa00140	Steroid hormone biosynthesis	0.185918	0.3301	0.179728	2
m16	hsa00730	Thiamine metabolism	0.19072	0.331853	0.180682	1
m16	hsa00450	Selenocompound metabolism	0.201365	0.343504	0.187026	1
m16	hsa00100	Steroid biosynthesis	0.222239	0.364808	0.198625	1
m16	hsa00770	Pantothenate and CoA biosynthesis	0.222239	0.364808	0.198625	1
m16	hsa04918	Thyroid hormone synthesis	0.253543	0.401512	0.218609	2
m16	hsa00190	Oxidative phosphorylation	0.25383	0.401512	0.218609	3
m16	hsa04964	Proximal tubule bicarbonate reclamation	0.262381	0.407627	0.221939	1
m16	hsa03018	RNA degradation	0.27796	0.421607	0.22955	2
m16	hsa00592	alpha-Linolenic acid metabolism	0.281675	0.421607	0.22955	1
m16	hsa05012	Parkinson disease	0.285917	0.421607	0.22955	3
m16	hsa00790	Folate biosynthesis	0.291134	0.421626	0.229561	1
m16	hsa00062	Fatty acid elongation	0.300469	0.421626	0.229561	1
m16	hsa01040	Biosynthesis of unsaturated fatty acids	0.300469	0.421626	0.229561	1
m16	hsa04932	Non-alcoholic fatty liver disease (NAFLD)	0.311114	0.429634	0.233921	3
m16	hsa00591	Linoleic acid metabolism	0.318777	0.433337	0.235937	1
m16	hsa00030	Pentose phosphate pathway	0.327752	0.43709	0.23798	1
m16	hsa00052	Galactose metabolism	0.336609	0.43709	0.23798	1
m16	hsa01523	Antifolate resistance	0.336609	0.43709	0.23798	1
m16	hsa00250	Alanine, aspartate and glutamate metabolism	0.379194	0.478114	0.260316	1
m16	hsa00500	Starch and sucrose metabolism	0.379194	0.478114	0.260316	1
m16	hsa05010	Alzheimer disease	0.390316	0.485107	0.264123	3
m16	hsa04726	Serotonergic synapse	0.447701	0.548591	0.298688	2
m16	hsa05016	Huntington disease	0.467264	0.559728	0.304752	3
m16	hsa04152	AMPK signaling pathway	0.469657	0.559728	0.304752	2
m16	hsa00230	Purine metabolism	0.511987	0.601931	0.32773	2
m16	hsa04723	Retrograde endocannabinoid signaling	0.582465	0.667878	0.363636	2
m16	hsa00970	Aminoacyl-tRNA biosynthesis	0.583434	0.667878	0.363636	1
m16	hsa04115	p53 signaling pathway	0.615454	0.695383	0.378611	1
m16	hsa04217	Necroptosis	0.631981	0.704902	0.383794	2
m16	hsa05146	Amoebiasis	0.720914	0.788027	0.429053	1
m16	hsa00564	Glycerophospholipid metabolism	0.724623	0.788027	0.429053	1
m16	hsa04750	Inflammatory mediator regulation of TRP channels	0.735458	0.789937	0.430093	1
m16	hsa04931	Insulin resistance	0.762332	0.808816	0.440372	1
m16	hsa04919	Thyroid hormone signaling pathway	0.7865	0.824404	0.448859	1
m16	hsa04270	Vascular smooth muscle contraction	0.827771	0.848723	0.4621	1
m16	hsa04210	Apoptosis	0.836788	0.848723	0.4621	1
m16	hsa04910	Insulin signaling pathway	0.838968	0.848723	0.4621	1
m16	hsa04024	cAMP signaling pathway	0.94156	0.94156	0.512646	1
m17	hsa01200	Carbon metabolism	1.43558e-23	1.22025e-21	6.34679e-22	24
m17	hsa00010	Glycolysis / Gluconeogenesis	1.82648e-21	6.95464e-20	3.61728e-20	19
m17	hsa00620	Pyruvate metabolism	2.45458e-21	6.95464e-20	3.61728e-20	16
m17	hsa00280	Valine, leucine and isoleucine degradation	1.34368e-19	2.85533e-18	1.48512e-18	16
m17	hsa00640	Propanoate metabolism	2.89669e-19	4.92438e-18	2.56129e-18	14
m17	hsa00071	Fatty acid degradation	1.34451e-18	1.90472e-17	9.90689e-18	15
m17	hsa00020	Citrate cycle (TCA cycle)	1.2718e-12	1.54433e-11	8.03244e-12	10
m17	hsa01212	Fatty acid metabolism	2.86834e-11	3.04761e-10	1.58513e-10	11
m17	hsa00630	Glyoxylate and dicarboxylate metabolism	1.90478e-09	1.79896e-08	9.3568e-09	8
m17	hsa03320	PPAR signaling pathway	1.94518e-08	1.65341e-07	8.59976e-08	10
m17	hsa00061	Fatty acid biosynthesis	5.02772e-08	3.88506e-07	2.02071e-07	6
m17	hsa04146	Peroxisome	6.01027e-08	4.25728e-07	2.21431e-07	10
m17	hsa00980	Metabolism of xenobiotics by cytochrome P450	3.3313e-07	2.17816e-06	1.13291e-06	9
m17	hsa00410	beta-Alanine metabolism	1.75147e-06	1.06339e-05	5.53097e-06	6
m17	hsa00982	Drug metabolism - cytochrome P450	2.54485e-06	1.44208e-05	7.50061e-06	8
m17	hsa00072	Synthesis and degradation of ketone bodies	4.35324e-06	2.31266e-05	1.20287e-05	4
m17	hsa00340	Histidine metabolism	7.34006e-06	3.67003e-05	1.90887e-05	5
m17	hsa00260	Glycine, serine and threonine metabolism	8.34739e-06	3.94182e-05	2.05024e-05	6
m17	hsa00380	Tryptophan metabolism	1.11831e-05	5.00296e-05	2.60216e-05	6
m17	hsa00830	Retinol metabolism	1.68326e-05	7.15387e-05	3.7209e-05	7
m17	hsa00650	Butanoate metabolism	2.04144e-05	8.26296e-05	4.29776e-05	5
m17	hsa00270	Cysteine and methionine metabolism	2.17789e-05	8.41459e-05	4.37663e-05	6
m17	hsa01230	Biosynthesis of amino acids	3.54478e-05	0.000131003	6.81377e-05	7
m17	hsa00350	Tyrosine metabolism	7.2416e-05	0.000250791	0.000130443	5
m17	hsa00100	Steroid biosynthesis	7.37622e-05	0.000250791	0.000130443	4
m17	hsa00310	Lysine degradation	8.11076e-05	0.00026516	0.000137916	6
m17	hsa05230	Central carbon metabolism in cancer	0.000140081	0.000440997	0.000229373	6
m17	hsa04922	Glucagon signaling pathway	0.000267116	0.000810888	0.000421762	7
m17	hsa00130	Ubiquinone and other terpenoid-quinone biosynthesis	0.000281186	0.000824166	0.000428668	3
m17	hsa00590	Arachidonic acid metabolism	0.00103788	0.00294066	0.00152951	5
m17	hsa00360	Phenylalanine metabolism	0.00109804	0.00301076	0.00156597	3
m17	hsa01210	2-Oxocarboxylic acid metabolism	0.00130589	0.00346878	0.0018042	3
m17	hsa00330	Arginine and proline metabolism	0.00327053	0.008378	0.0043576	4
m17	hsa05204	Chemical carcinogenesis	0.0033512	0.008378	0.0043576	5
m17	hsa00053	Ascorbate and aldarate metabolism	0.00431919	0.0104895	0.00545582	3
m17	hsa00561	Glycerolipid metabolism	0.00668473	0.0157834	0.00820932	4
m17	hsa00040	Pentose and glucuronate interconversions	0.00830253	0.0190734	0.00992052	3
m17	hsa04920	Adipocytokine signaling pathway	0.0102763	0.0229865	0.0119558	4
m17	hsa04714	Thermogenesis	0.0239277	0.0521501	0.0271245	7
m17	hsa00670	One carbon pool by folate	0.0248647	0.0528375	0.027482	2
m17	hsa00900	Terpenoid backbone biosynthesis	0.0297525	0.0616821	0.0320823	2
m17	hsa04066	HIF-1 signaling pathway	0.0349647	0.0707618	0.0368049	4
m17	hsa00140	Steroid hormone biosynthesis	0.0377521	0.0746263	0.0388149	3
m17	hsa00051	Fructose and mannose metabolism	0.0623366	0.120423	0.0626349	2
m17	hsa04216	Ferroptosis	0.0871697	0.164654	0.0856404	2
m17	hsa00565	Ether lipid metabolism	0.114401	0.211394	0.109951	2
m17	hsa00480	Glutathione metabolism	0.152039	0.274964	0.143016	2
m17	hsa04726	Serotonergic synapse	0.169777	0.300647	0.156374	3
m17	hsa00190	Oxidative phosphorylation	0.22667	0.391233	0.20349	3
m17	hsa00220	Arginine biosynthesis	0.230137	0.391233	0.20349	1
m17	hsa04964	Proximal tubule bicarbonate reclamation	0.249104	0.411202	0.213876	1
m17	hsa03018	RNA degradation	0.255487	0.411202	0.213876	2
m17	hsa05012	Parkinson disease	0.256397	0.411202	0.213876	3
m17	hsa00592	alpha-Linolenic acid metabolism	0.267609	0.418643	0.217746	1
m17	hsa00790	Folate biosynthesis	0.276691	0.418643	0.217746	1
m17	hsa04932	Non-alcoholic fatty liver disease (NAFLD)	0.279888	0.418643	0.217746	3
m17	hsa00062	Fatty acid elongation	0.285662	0.418643	0.217746	1
m17	hsa01040	Biosynthesis of unsaturated fatty acids	0.285662	0.418643	0.217746	1
m17	hsa00591	Linoleic acid metabolism	0.303275	0.436921	0.227253	1
m17	hsa00030	Pentose phosphate pathway	0.311919	0.439337	0.22851	1
m17	hsa00052	Galactose metabolism	0.320458	0.439337	0.22851	1
m17	hsa01523	Antifolate resistance	0.320458	0.439337	0.22851	1
m17	hsa05010	Alzheimer disease	0.354577	0.478398	0.248826	3
m17	hsa00250	Alanine, aspartate and glutamate metabolism	0.361601	0.480252	0.24979	1
m17	hsa04931	Insulin resistance	0.387057	0.506151	0.263261	2
m17	hsa04975	Fat digestion and absorption	0.400278	0.515509	0.268129	1
m17	hsa05016	Huntington disease	0.428413	0.543509	0.282692	3
m17	hsa04152	AMPK signaling pathway	0.438834	0.548542	0.28531	2
m17	hsa00520	Amino sugar and nucleotide sugar metabolism	0.450558	0.555035	0.288687	1
m17	hsa04723	Retrograde endocannabinoid signaling	0.549694	0.662873	0.344776	2
m17	hsa04927	Cortisol synthesis and secretion	0.555958	0.662873	0.344776	1
m17	hsa00970	Aminoacyl-tRNA biosynthesis	0.561492	0.662873	0.344776	1
m17	hsa04115	p53 signaling pathway	0.593296	0.690824	0.359314	1
m17	hsa01522	Endocrine resistance	0.706716	0.798567	0.415354	1
m17	hsa04925	Aldosterone synthesis and secretion	0.706716	0.798567	0.415354	1
m17	hsa04750	Inflammatory mediator regulation of TRP channels	0.714013	0.798567	0.415354	1
m17	hsa04928	Parathyroid hormone synthesis, secretion and action	0.734843	0.81119	0.421919	1
m17	hsa04919	Thyroid hormone signaling pathway	0.766274	0.835042	0.434325	1
m17	hsa00230	Purine metabolism	0.804173	0.858909	0.446739	1
m17	hsa04270	Vascular smooth muscle contraction	0.809065	0.858909	0.446739	1
m17	hsa04210	Apoptosis	0.81849	0.858909	0.446739	1
m17	hsa04934	Cushing syndrome	0.857334	0.8887	0.462234	1
m17	hsa04217	Necroptosis	0.869466	0.890417	0.463127	1
m17	hsa05152	Tuberculosis	0.894842	0.905494	0.470969	1
m17	hsa04024	cAMP signaling pathway	0.930975	0.930975	0.484222	1
m18	hsa01200	Carbon metabolism	4.39561e-23	3.38462e-21	1.80451e-21	23
m18	hsa00620	Pyruvate metabolism	5.58627e-22	2.15071e-20	1.14665e-20	16
m18	hsa00640	Propanoate metabolism	9.3384e-22	2.39686e-20	1.27789e-20	15
m18	hsa00010	Glycolysis / Gluconeogenesis	1.28547e-20	2.47454e-19	1.3193e-19	18
m18	hsa00280	Valine, leucine and isoleucine degradation	3.08489e-20	4.75074e-19	2.53286e-19	16
m18	hsa00071	Fatty acid degradation	3.41014e-19	4.37634e-18	2.33325e-18	15
m18	hsa04146	Peroxisome	6.62113e-19	7.28324e-18	3.88307e-18	18
m18	hsa00020	Citrate cycle (TCA cycle)	5.23949e-13	5.04301e-12	2.68868e-12	10
m18	hsa01212	Fatty acid metabolism	1.09572e-11	9.37449e-11	4.99802e-11	11
m18	hsa00630	Glyoxylate and dicarboxylate metabolism	9.49762e-10	7.31317e-09	3.89902e-09	8
m18	hsa03320	PPAR signaling pathway	8.35014e-09	5.8451e-08	3.11632e-08	10
m18	hsa00061	Fatty acid biosynthesis	2.98806e-08	1.91734e-07	1.02223e-07	6
m18	hsa00410	beta-Alanine metabolism	4.00867e-08	2.37436e-07	1.26589e-07	7
m18	hsa00072	Synthesis and degradation of ketone bodies	3.08284e-06	1.69556e-05	9.03991e-06	4
m18	hsa00340	Histidine metabolism	4.80081e-06	2.46442e-05	1.31391e-05	5
m18	hsa00380	Tryptophan metabolism	6.78758e-06	3.26652e-05	1.74155e-05	6
m18	hsa00270	Cysteine and methionine metabolism	1.32765e-05	5.73609e-05	3.0582e-05	6
m18	hsa00650	Butanoate metabolism	1.3409e-05	5.73609e-05	3.0582e-05	5
m18	hsa00350	Tyrosine metabolism	4.78896e-05	0.000192355	0.000102554	5
m18	hsa00310	Lysine degradation	4.99622e-05	0.000192355	0.000102554	6
m18	hsa00260	Glycine, serine and threonine metabolism	8.06574e-05	0.000295744	0.000157676	5
m18	hsa00830	Retinol metabolism	0.000102916	0.000360206	0.000192044	6
m18	hsa01230	Biosynthesis of amino acids	0.000193138	0.000646592	0.000344731	6
m18	hsa00980	Metabolism of xenobiotics by cytochrome P450	0.000207802	0.000666699	0.000355451	6
m18	hsa00561	Glycerolipid metabolism	0.00060491	0.00186312	0.000993326	5
m18	hsa05230	Central carbon metabolism in cancer	0.000810556	0.00240049	0.00127983	5
m18	hsa00360	Phenylalanine metabolism	0.000854875	0.00243798	0.00129981	3
m18	hsa01210	2-Oxocarboxylic acid metabolism	0.00101747	0.00279804	0.00149178	3
m18	hsa04922	Glucagon signaling pathway	0.00106473	0.00282705	0.00150725	6
m18	hsa00670	One carbon pool by folate	0.00139835	0.0035891	0.00191353	3
m18	hsa00330	Arginine and proline metabolism	0.00239224	0.00594201	0.00316799	4
m18	hsa00053	Ascorbate and aldarate metabolism	0.0033882	0.00815285	0.0043467	3
m18	hsa04714	Thermogenesis	0.00453788	0.0105884	0.0056452	8
m18	hsa00040	Pentose and glucuronate interconversions	0.00654714	0.0148273	0.00790521	3
m18	hsa04920	Adipocytokine signaling pathway	0.00763032	0.0167867	0.00894985	4
m18	hsa05204	Chemical carcinogenesis	0.0138176	0.0295544	0.0157569	4
m18	hsa04066	HIF-1 signaling pathway	0.0265909	0.0553379	0.0295035	4
m18	hsa00982	Drug metabolism - cytochrome P450	0.0480408	0.0973459	0.0519001	3
m18	hsa00051	Fructose and mannose metabolism	0.0535219	0.105671	0.0563388	2
m18	hsa04216	Ferroptosis	0.0751793	0.14472	0.0771577	2
m18	hsa00130	Ubiquinone and other terpenoid-quinone biosynthesis	0.117992	0.221595	0.118144	1
m18	hsa00480	Glutathione metabolism	0.13244	0.242807	0.129453	2
m18	hsa04152	AMPK signaling pathway	0.155092	0.277722	0.148068	3
m18	hsa00590	Arachidonic acid metabolism	0.159876	0.279782	0.149166	2
m18	hsa00190	Oxidative phosphorylation	0.191475	0.326501	0.174074	3
m18	hsa00770	Pantothenate and CoA biosynthesis	0.195052	0.326501	0.174074	1
m18	hsa00220	Arginine biosynthesis	0.213253	0.347452	0.185244	1
m18	hsa05012	Parkinson disease	0.217827	0.347452	0.185244	3
m18	hsa00900	Terpenoid backbone biosynthesis	0.2222	0.347452	0.185244	1
m18	hsa03018	RNA degradation	0.225618	0.347452	0.185244	2
m18	hsa04964	Proximal tubule bicarbonate reclamation	0.231047	0.348835	0.185982	1
m18	hsa04932	Non-alcoholic fatty liver disease (NAFLD)	0.238826	0.353646	0.188547	3
m18	hsa00592	alpha-Linolenic acid metabolism	0.248443	0.360945	0.192438	1
m18	hsa00790	Folate biosynthesis	0.256994	0.364992	0.194596	1
m18	hsa00062	Fatty acid elongation	0.265449	0.364992	0.194596	1
m18	hsa01040	Biosynthesis of unsaturated fatty acids	0.265449	0.364992	0.194596	1
m18	hsa00030	Pentose phosphate pathway	0.290248	0.389344	0.207579	1
m18	hsa00052	Galactose metabolism	0.298329	0.389344	0.207579	1
m18	hsa01523	Antifolate resistance	0.298329	0.389344	0.207579	1
m18	hsa05010	Alzheimer disease	0.30662	0.393496	0.209793	3
m18	hsa00250	Alanine, aspartate and glutamate metabolism	0.337388	0.425883	0.22706	1
m18	hsa04975	Fat digestion and absorption	0.374297	0.458588	0.244497	1
m18	hsa05016	Huntington disease	0.375208	0.458588	0.244497	3
m18	hsa02010	ABC transporters	0.402353	0.484081	0.258088	1
m18	hsa00565	Ether lipid metabolism	0.415911	0.492695	0.262681	1
m18	hsa00140	Steroid hormone biosynthesis	0.496919	0.578415	0.308382	1
m18	hsa04723	Retrograde endocannabinoid signaling	0.503296	0.578415	0.308382	2
m18	hsa00970	Aminoacyl-tRNA biosynthesis	0.530458	0.600666	0.320245	1
m18	hsa04115	p53 signaling pathway	0.561784	0.626919	0.334242	1
m18	hsa04750	Inflammatory mediator regulation of TRP channels	0.68272	0.750992	0.400392	1
m18	hsa04931	Insulin resistance	0.710747	0.77081	0.410958	1
m18	hsa04726	Serotonergic synapse	0.733252	0.776669	0.414082	1
m18	hsa04919	Thyroid hormone signaling pathway	0.736323	0.776669	0.414082	1
m18	hsa04270	Vascular smooth muscle contraction	0.780954	0.81198	0.432908	1
m18	hsa04210	Apoptosis	0.79089	0.81198	0.432908	1
m18	hsa04217	Necroptosis	0.845448	0.856572	0.456682	1
m18	hsa04024	cAMP signaling pathway	0.913838	0.913838	0.487214	1
m19	hsa03040	Spliceosome	5.77179e-22	8.65768e-21	6.68312e-21	17
m19	hsa03015	mRNA surveillance pathway	2.76997e-12	2.07748e-11	1.60367e-11	10
m19	hsa03018	RNA degradation	0.000350836	0.00175418	0.0013541	4
m19	hsa03013	RNA transport	0.000657032	0.00246387	0.00190193	5
m19	hsa03008	Ribosome biogenesis in eukaryotes	0.0754429	0.226329	0.17471	2
m19	hsa03020	RNA polymerase	0.12617	0.305152	0.235556	1
m19	hsa04216	Ferroptosis	0.159808	0.305152	0.235556	1
m19	hsa05164	Influenza A	0.162748	0.305152	0.235556	2
m19	hsa05416	Viral myocarditis	0.226746	0.354365	0.273545	1
m19	hsa04623	Cytosolic DNA-sensing pathway	0.240164	0.354365	0.273545	1
m19	hsa05211	Renal cell carcinoma	0.259867	0.354365	0.273545	1
m19	hsa05322	Systemic lupus erythematosus	0.44147	0.551837	0.42598	1
m19	hsa05202	Transcriptional misregulation in cancer	0.558404	0.6128	0.473038	1
m19	hsa05016	Huntington disease	0.571946	0.6128	0.473038	1
m19	hsa05168	Herpes simplex virus 1 infection	0.889896	0.889896	0.686937	1
m20	hsa04962	Vasopressin-regulated water reabsorption	2.58201e-08	8.00423e-07	1.63074e-07	5
m20	hsa04145	Phagosome	4.96701e-07	7.69887e-06	1.56853e-06	6
m20	hsa04130	SNARE interactions in vesicular transport	4.8492e-05	0.000501084	0.000102088	3
m20	hsa05132	Salmonella infection	0.000773489	0.00599454	0.0012213	3
m20	hsa05310	Asthma	0.00197979	0.0122747	0.00250079	2
m20	hsa05330	Allograft rejection	0.00296656	0.0146722	0.00298924	2
m20	hsa05332	Graft-versus-host disease	0.0034471	0.0146722	0.00298924	2
m20	hsa04940	Type I diabetes mellitus	0.00378637	0.0146722	0.00298924	2
m20	hsa04672	Intestinal immune network for IgA production	0.00489359	0.0168557	0.0034341	2
m20	hsa05320	Autoimmune thyroid disease	0.00570507	0.0172824	0.00352103	2
m20	hsa05134	Legionellosis	0.00613245	0.0172824	0.00352103	2
m20	hsa05416	Viral myocarditis	0.00702992	0.0181606	0.00369996	2
m20	hsa05321	Inflammatory bowel disease (IBD)	0.00848112	0.0202242	0.00412038	2
m20	hsa05150	Staphylococcus aureus infection	0.00925313	0.0204891	0.00417434	2
m20	hsa05140	Leishmaniasis	0.0108881	0.022502	0.00458445	2
m20	hsa04612	Antigen processing and presentation	0.0117503	0.0227661	0.00463826	2
m20	hsa04144	Endocytosis	0.014623	0.0266654	0.00543268	3
m20	hsa05323	Rheumatoid arthritis	0.0161553	0.0269102	0.00548256	2
m20	hsa04658	Th1 and Th2 cell differentiation	0.0164934	0.0269102	0.00548256	2
m20	hsa04640	Hematopoietic cell lineage	0.0182293	0.0282555	0.00575663	2
m20	hsa04659	Th17 cell differentiation	0.0219238	0.0323637	0.00659362	2
m20	hsa05145	Toxoplasmosis	0.0242786	0.0342107	0.00696993	2
m20	hsa05322	Systemic lupus erythematosus	0.0328373	0.0442589	0.0090171	2
m20	hsa04514	Cell adhesion molecules (CAMs)	0.0389521	0.0503131	0.0102505	2
m20	hsa05164	Influenza A	0.049674	0.0615958	0.0125492	2
m20	hsa05152	Tuberculosis	0.0562357	0.0670503	0.0136605	2
m20	hsa05016	Huntington disease	0.0642608	0.0737809	0.0150318	2
m20	hsa05169	Epstein-Barr virus infection	0.0690153	0.0764098	0.0155674	2
m20	hsa05166	Human T-cell leukemia virus 1 infection	0.0801312	0.0856575	0.0174514	2
m20	hsa04728	Dopaminergic synapse	0.249108	0.257411	0.0524437	1
m20	hsa05168	Herpes simplex virus 1 infection	0.289139	0.289139	0.0589077	2
